# Supplementary material
Source: PubMed Central journal article supplement (PMC4076383)
Supplement: supp_114.117531_biolreprod.114.117531-1.pdf [file supp_114.117531_biolreprod.114.117531-1.pdf]

Supplemental Table S1: Total list of genes for which transcriptional expression is significantly increased in the P4-treated SRC-2<sup>ff</sup> uterus as compared to oil-treated SRC-2<sup>ff</sup> uterus (fold change > 1.5 with  $p < 0.05$ ).

Supplemental Table S2: Total list of genes for which transcriptional expression is significantly decreased in the P4-treated SRC-2<sup>ff</sup> uterus compared to oil-treated SRC-2<sup>ff</sup> uterus (fold change < -1.5 with  $p < 0.05$ ).

Supplemental Table S3: Total list of genes with significantly decreased transcript levels in the P4-treated SRC-2<sup>d/d</sup> uterus as compared to P4-treated SRC-2<sup>ff</sup> uterus (fold change < -1.4 with  $p < 0.05$ ). Fold change indicates the fold decrease in transcriptional induction by P4 when SRC-2 levels are depleted.

Supplemental Table S4: Total list of genes with significantly increased transcript levels in the P4-treated SRC-2<sup>d/d</sup> uterus as compared to P4-treated SRC-2<sup>ff</sup> uterus (fold change < -1.4 with  $p < 0.05$ ). Fold change indicates the fold decrease in transcriptional repression by P4 when SRC-2 levels are depleted.

| SUPPLEMENTAL TABLE 1: List of Genes Upregulated by P4 in SRC-2 <sup>ff</sup> (Control) Mice |                                                                   |               |           |             |           |
|---------------------------------------------------------------------------------------------|-------------------------------------------------------------------|---------------|-----------|-------------|-----------|
| Probe set                                                                                   | Gene Title                                                        | Gene Symbol   | Entrez ID | Fold change | p value   |
| 1421134_at                                                                                  | amphiregulin                                                      | Areg          | 11839     | 47.0        | 0.0027551 |
| 1429608_at                                                                                  | alcohol dehydrogenase 6A (class V)                                | Adh6a         | 69117     | 45.2        | 0.0008686 |
| 1420504_at                                                                                  | solute carrier family 6 (neurotransmitter transporter), member 14 | Slc6a14       | 56774     | 28.8        | 1.46E-05  |
| 1420771_at                                                                                  | small proline-rich protein 2D                                     | Sprr2d        | 20758     | 25.8        | 0.0073407 |
| 1420503_at                                                                                  | solute carrier family 6 (neurotransmitter transporter), member 14 | Slc6a14       | 56774     | 17.9        | 3.925E-05 |
| 1434202_a_at                                                                                | family with sequence similarity 107, member A                     | Fam107a       | 268709    | 16.4        | 0.0001316 |
| 1429013_at                                                                                  | MAP7 domain containing 2                                          | Mtap7d2       | 78283     | 15.0        | 9.403E-05 |
| 1419253_at                                                                                  | methylenetetrahydrofolate dehydrogenase (NAD+ dependent), meth    | Mthfd2        | 17768     | 10.7        | 0.0001732 |
| 1416125_at                                                                                  | FK506 binding protein 5                                           | Fkbp5         | 14229     | 9.6         | 0.0010067 |
| 1426595_at                                                                                  | solute carrier family 18 (vesicular monoamine), member 1          | Slc18a1       | 110877    | 9.3         | 0.0008715 |
| 1417094_at                                                                                  | acyl-CoA thioesterase 7                                           | Acot7         | 70025     | 9.3         | 4.608E-05 |
| 1419430_at                                                                                  | cytochrome P450, family 26, subfamily a, polypeptide 1            | Cyp26a1       | 13082     | 9.2         | 0.0041674 |
| 1427102_at                                                                                  | schlafen 4                                                        | Slfn4         | 20558     | 9.0         | 0.0053616 |
| 1421113_at                                                                                  | pepsinogen 5, group I                                             | Pga5          | 58803     | 9.0         | 1.668E-05 |
| 1448756_at                                                                                  | S100 calcium binding protein A9 (calgranulin B)                   | S100a9        | 20202     | 8.2         | 0.0083516 |
| 1419254_at                                                                                  | methylenetetrahydrofolate dehydrogenase (NAD+ dependent), meth    | Mthfd2        | 17768     | 8.2         | 6.958E-05 |
| 1455913_x_at                                                                                | transthyretin                                                     | Ttr           | 22139     | 8.1         | 0.0001228 |
| 1419394_s_at                                                                                | S100 calcium binding protein A8 (calgranulin A)                   | S100a8        | 20201     | 8.0         | 0.0029658 |
| 1454608_x_at                                                                                | transthyretin                                                     | Ttr           | 22139     | 8.0         | 8.043E-06 |
| 1417231_at                                                                                  | claudin 2                                                         | Cldn2         | 12738     | 7.5         | 0.0010394 |
| 1422177_at                                                                                  | interleukin 13 receptor, alpha 2                                  | Il13ra2       | 16165     | 7.9         | 8.918E-05 |
| 1426268_at                                                                                  | RIKEN cDNA C130090K23 gene                                        | C130090K23Rik | 231293    | 6.8         | 0.000312  |
| 1452284_at                                                                                  | protein tyrosine phosphatase, receptor type Z, polypeptide 1      | Ptprz1        | 19283     | 6.8         | 2.857E-05 |
| 1418806_at                                                                                  | colony stimulating factor 3 receptor (granulocyte)                | Csf3r         | 12986     | 6.3         | 0.0067639 |
| 1431211_s_at                                                                                | thioesterase superfamily member 5                                 | Them5         | 66198     | 6.2         | 0.0011985 |
| 1416761_at                                                                                  | hydroxysteroid 11-beta dehydrogenase 2                            | Hsd11b2       | 15484     | 6.0         | 0.0003528 |
| 1427019_at                                                                                  | protein tyrosine phosphatase, receptor type Z, polypeptide 1      | Ptprz1        | 19283     | 5.9         | 0.0001396 |
| 1424211_at                                                                                  | solute carrier family 25, member 33                               | Slc25a33      | 70556     | 5.9         | 0.0001928 |
| 1435999_at                                                                                  | serine peptidase inhibitor, Kazal type 8                          | Spink8        | 78709     | 5.7         | 0.0002118 |
| 1449592_at                                                                                  | transcription factor 15                                           | Tcf15         | 21407     | 5.6         | 6.097E-05 |
| 1444176_at                                                                                  | ATPase, H+ transporting, lysosomal V0 subunit D2                  | Atp6v0d2      | 242341    | 5.6         | 0.0044336 |
| 1451532_s_at                                                                                | six transmembrane epithelial antigen of the prostate 1            | Steap1        | 70358     | 5.5         | 0.0013859 |
| 1424938_at                                                                                  | six transmembrane epithelial antigen of the prostate 1            | Steap1        | 70358     | 5.1         | 0.0076819 |
| 1451796_s_at                                                                                | histidine decarboxylase                                           | Hdc           | 15186     | 5.6         | 0.0057087 |
| 1434203_at                                                                                  | family with sequence similarity 107, member A                     | Fam107a       | 268709    | 5.5         | 8.211E-06 |

|              |                                                                      |               |        |     |           |
|--------------|----------------------------------------------------------------------|---------------|--------|-----|-----------|
| 1453801_at   | thioesterase superfamily member 5                                    | Them5         | 66198  | 5.3 | 0.0009678 |
| 1454713_s_at | histidine decarboxylase                                              | Hdc           | 15186  | 5.2 | 0.0069182 |
| 1459737_s_at | transthyretin                                                        | Ttr           | 22139  | 5.2 | 6.326E-05 |
| 1419532_at   | interleukin 1 receptor, type II                                      | Il1r2         | 16178  | 5.1 | 0.0097626 |
| 1416432_at   | 6-phosphofructo-2-kinase/fructose-2,6-biphosphatase 3                | Pfkfb3        | 170768 | 5.0 | 1.169E-05 |
| 1434008_at   | sodium channel, type IV, beta                                        | Scn4b         | 399548 | 4.9 | 0.0017421 |
| 1416041_at   | serum/glucocorticoid regulated kinase 1                              | Sgk1          | 20393  | 4.8 | 1.565E-05 |
| 1423611_at   | alkaline phosphatase, liver/bone/kidney                              | Alpl          | 11647  | 4.7 | 0.0012416 |
| 1429216_at   | progesterin and adipoQ receptor family member III                    | Paqr3         | 231474 | 4.7 | 6.179E-05 |
| 1450731_s_at | tumor necrosis factor receptor superfamily, member 21                | Tnfrsf21      | 94185  | 4.7 | 6.962E-05 |
| 1431416_a_at | junction adhesion molecule 2                                         | Jam2          | 67374  | 4.7 | 2.185E-05 |
| 1451580_a_at | transthyretin                                                        | Ttr           | 22139  | 4.7 | 0.000768  |
| 1450704_at   | Indian hedgehog                                                      | Ihh           | 16147  | 4.4 | 1.198E-05 |
| 1448842_at   | cysteine dioxygenase 1, cytosolic                                    | Cdo1          | 12583  | 5.0 | 0.0039839 |
| 1434458_at   | follistatin                                                          | Fst           | 14313  | 4.9 | 0.0034918 |
| 1433902_at   | kelch repeat and BTB (POZ) domain containing 8                       | Kbtbd8        | 243574 | 4.5 | 0.0057122 |
| 1456509_at   | RIKEN cDNA 1110032F04 gene                                           | 1110032F04Rik | 68725  | 4.2 | 0.0009292 |
| 1434798_at   | ATPase, H+ transporting, lysosomal V0 subunit D2                     | Atp6v0d2      | 242341 | 4.1 | 0.0020137 |
| 1418203_at   | phorbol-12-myristate-13-acetate-induced protein 1                    | Pmaip1        | 58801  | 4.3 | 0.0008548 |
| 1422740_at   | tumor necrosis factor receptor superfamily, member 21                | Tnfrsf21      | 94185  | 4.3 | 3.884E-05 |
| 1427514_at   | hypothetical protein LOC624295                                       | LOC624295     | 624295 | 4.3 | 0.0009875 |
| 1454866_s_at | chloride intracellular channel 6                                     | Clic6         | 209195 | 4.2 | 0.0004381 |
| 1455898_x_at | solute carrier family 2 (facilitated glucose transporter), member 3  | Slc2a3        | 20527  | 4.2 | 8.827E-05 |
| 1452652_at   | transmembrane protein 158                                            | Tmem158       | 72309  | 4.2 | 0.0010959 |
| 1437052_s_at | solute carrier family 2 (facilitated glucose transporter), member 3  | Slc2a3        | 20527  | 4.1 | 0.0001853 |
| 1426243_at   | cystathionase (cystathionine gamma-lyase)                            | Cth           | 107869 | 4.1 | 0.00016   |
| 1418453_a_at | ATPase, Na+/K+ transporting, beta 1 polypeptide                      | Atp1b1        | 11931  | 4.0 | 2.975E-05 |
| 1439036_a_at | ATPase, Na+/K+ transporting, beta 1 polypeptide                      | Atp1b1        | 11931  | 4.0 | 5.124E-05 |
| 1434411_at   | collagen, type XII, alpha 1                                          | Col12a1       | 12816  | 3.9 | 0.0004822 |
| 1429029_at   | sphingomyelin synthase 2                                             | Sgms2         | 74442  | 3.9 | 0.0021422 |
| 1436568_at   | junction adhesion molecule 2                                         | Jam2          | 67374  | 3.9 | 0.0002383 |
| 1439569_at   | G protein-coupled receptor 83                                        | Gpr83         | 14608  | 3.8 | 0.0030127 |
| 1424901_at   | glucosaminyl (N-acetyl) transferase 3, mucin type                    | Gcnt3         | 72077  | 3.8 | 0.0008426 |
| 1417149_at   | procollagen-proline, 2-oxoglutarate 4-dioxygenase (proline 4-hydroxy | P4ha2         | 18452  | 3.8 | 0.0001001 |
| 1421260_a_at | spermidine synthase                                                  | Srm           | 20810  | 3.8 | 8.064E-05 |
| 1421078_at   | transcription factor 23                                              | Tcf23         | 69852  | 3.8 | 0.0009004 |
| 1427735_a_at | actin, alpha 1, skeletal muscle                                      | Acta1         | 11459  | 3.8 | 0.0001627 |

|              |                                                                          |           |        |     |           |
|--------------|--------------------------------------------------------------------------|-----------|--------|-----|-----------|
| 1428662_a_at | HOP homeobox                                                             | Hopx      | 74318  | 3.7 | 9.615E-05 |
| 1421037_at   | neuronal PAS domain protein 2                                            | Npas2     | 18143  | 3.7 | 0.0003109 |
| 1434239_at   | ribosomal RNA processing 12 homolog ( <i>S. cerevisiae</i> )             | Rrp12     | 107094 | 3.7 | 0.0002547 |
| 1449408_at   | junction adhesion molecule 2                                             | Jam2      | 67374  | 3.7 | 5.821E-05 |
| 1428663_at   | sphingomyelin synthase 2                                                 | Sgms2     | 74442  | 3.7 | 0.0012403 |
| 1429262_at   | Ras association (RalGDS/AF-6) domain family member 6                     | Rassf6    | 73246  | 3.7 | 0.006603  |
| 1419272_at   | myeloid differentiation primary response gene 88                         | Myd88     | 17874  | 3.6 | 1.225E-05 |
| 1451776_s_at | HOP homeobox                                                             | Hopx      | 74318  | 3.6 | 6.776E-05 |
| 1450772_at   | wingless-related MMTV integration site 11                                | Wnt11     | 22411  | 3.6 | 0.0004619 |
| 1439163_at   | zinc finger and BTB domain containing 16                                 | Zbtb16    | 235320 | 3.6 | 0.0146189 |
| 1438306_at   | ring finger protein 180                                                  | Rnf180    | 71816  | 3.6 | 0.00092   |
| 1439016_x_at | small proline-rich protein 2A                                            | Sprr2a    | 20755  | 3.7 | 0.0060687 |
| 1428550_at   | YdjC homolog (bacterial)                                                 | Ydjc      | 69101  | 3.6 | 0.006595  |
| 1424140_at   | galactose-4-epimerase, UDP                                               | Gale      | 74246  | 3.6 | 0.0009341 |
| 1419874_x_at | zinc finger and BTB domain containing 16                                 | Zbtb16    | 235320 | 3.5 | 0.001634  |
| 1419195_at   | WAP four-disulfide core domain 15B                                       | Wfdc15b   | 192201 | 3.4 | 0.0002558 |
| 1451599_at   | sestrin 2                                                                | Sesn2     | 230784 | 3.4 | 0.0008307 |
| 1419705_at   | carbonic anhydrase 5b, mitochondrial                                     | Car5b     | 56078  | 3.4 | 0.0017084 |
| 1450855_at   | armadillo repeat gene deleted in velo-cardio-facial syndrome             | Arvcf     | 11877  | 3.2 | 0.0008626 |
| 1450826_a_at | serum amyloid A 3                                                        | Saa3      | 20210  | 3.2 | 0.0045992 |
| 1418572_x_at | tumor necrosis factor receptor superfamily, member 12a                   | Tnfrsf12a | 27279  | 3.1 | 0.0004579 |
| 1418571_at   | tumor necrosis factor receptor superfamily, member 12a                   | Tnfrsf12a | 27279  | 3.1 | 0.0002739 |
| 1452490_a_at | adaptor protein complex AP-2, alpha 2 subunit                            | Ap2a2     | 11772  | 3.0 | 0.0001421 |
| 1460197_a_at | STEAP family member 4                                                    | Steap4    | 117167 | 3.0 | 0.0013545 |
| 1418346_at   | insulin-like 6                                                           | Insl6     | 27356  | 3.5 | 0.0002225 |
| 1451339_at   | sulfite oxidase                                                          | Suox      | 211389 | 3.5 | 0.0001378 |
| 1417262_at   | prostaglandin-endoperoxide synthase 2                                    | Ptgs2     | 19225  | 3.4 | 0.0087407 |
| 1448231_at   | FK506 binding protein 5                                                  | Fkbp5     | 14229  | 3.4 | 0.0005032 |
| 1452326_at   | ATPase, Ca <sup>++</sup> transporting, type 2C, member 2                 | Atp2c2    | 69047  | 3.4 | 0.0023279 |
| 1456981_at   | transmembrane channel-like gene family 7                                 | Tmc7      | 209760 | 3.4 | 2.337E-05 |
| 1417089_a_at | creatine kinase, mitochondrial 1, ubiquitous                             | Ckmt1     | 12716  | 3.4 | 0.0003886 |
| 1422612_at   | hexokinase 2                                                             | Hk2       | 15277  | 3.4 | 0.0016794 |
| 1419569_a_at | interferon-stimulated protein                                            | Isg20     | 57444  | 3.3 | 0.0024883 |
| 1451152_a_at | ATPase, Na <sup>+</sup> /K <sup>+</sup> transporting, beta 1 polypeptide | Atp1b1    | 11931  | 3.3 | 6.453E-05 |
| 1419282_at   | chemokine (C-C motif) ligand 12                                          | Ccl12     | 20293  | 3.3 | 0.0041385 |
| 1423890_x_at | ATPase, Na <sup>+</sup> /K <sup>+</sup> transporting, beta 1 polypeptide | Atp1b1    | 11931  | 3.3 | 1.058E-05 |
| 1452367_at   | coronin, actin binding protein 2A                                        | Coro2a    | 107684 | 3.3 | 7.382E-05 |

|              |                                                                |               |        |     |           |
|--------------|----------------------------------------------------------------|---------------|--------|-----|-----------|
| 1455419_at   | RIKEN cDNA D630045J12 gene                                     | D630045J12Rik | 330286 | 3.3 | 0.0001163 |
| 1420961_a_at | influenza virus NS1A binding protein                           | lvns1abp      | 117198 | 3.2 | 0.0002378 |
| 1417689_a_at | PDZK1 interacting protein 1                                    | Pdzk1ip1      | 67182  | 3.2 | 0.0020919 |
| 1416563_at   | cytidine 5'-triphosphate synthase                              | Ctps          | 51797  | 3.2 | 6.921E-05 |
| 1448067_at   | expressed sequence AW011956                                    | AW011956      | 105332 | 3.2 | 0.0013575 |
| 1431705_a_at | mucolin 2                                                      | Mcoln2        | 68279  | 3.2 | 0.0003386 |
| 1415916_a_at | methylenetetrahydrofolate dehydrogenase (NADP+ dependent), met | Mthfd1        | 108156 | 3.2 | 9.276E-06 |
| 1460555_at   | family with sequence similarity 65, member B                   | Fam65b        | 193385 | 3.2 | 0.0013648 |
| 1451502_at   | phospholipase A2, group X                                      | Pla2g10       | 26565  | 3.2 | 0.0097372 |
| 1415917_at   | methylenetetrahydrofolate dehydrogenase (NADP+ dependent), met | Mthfd1        | 108156 | 3.1 | 9.551E-06 |
| 1419491_at   | defensin beta 1                                                | Defb1         | 13214  | 3.1 | 0.0058954 |
| 1422821_s_at | StAR-related lipid transfer (START) domain containing 5        | Stard5        | 170460 | 3.1 | 6.514E-05 |
| 1455477_s_at | PDZK1 interacting protein 1                                    | Pdzk1ip1      | 67182  | 3.1 | 0.0016724 |
| 1422767_at   | bystin-like                                                    | Bysl          | 53414  | 3.1 | 8.343E-05 |
| 1436941_at   | family with sequence similarity 55, member C                   | Fam55c        | 385658 | 3.1 | 0.0002153 |
| 1440409_at   | glucosaminyl (N-acetyl) transferase 3, mucin type              | Gcnt3         | 72077  | 3.1 | 0.001224  |
| 1419816_s_at | ERBB receptor feedback inhibitor 1                             | Errfi1        | 74155  | 3.1 | 0.0094078 |
| 1440116_at   | RIKEN cDNA D630045J12 gene                                     | D630045J12Rik | 330286 | 3.1 | 0.0005886 |
| 1433789_at   | small nucleolar RNA host gene (non-protein coding) 3           | Snhg3         | 399101 | 3.0 | 0.000537  |
| 1426410_at   | pyruvate dehydrogenase kinase, isoenzyme 3                     | Pdk3          | 236900 | 3.0 | 9.271E-06 |
| 1434413_at   | insulin-like growth factor 1                                   | Igf1          | 16000  | 3.0 | 0.0010776 |
| 1450852_s_at | coagulation factor II (thrombin) receptor                      | F2r           | 14062  | 3.0 | 0.0001786 |
| 1429400_at   | chloride channel 5                                             | Clcn5         | 12728  | 3.0 | 0.0001222 |
| 1439795_at   | G protein-coupled receptor 64                                  | Gpr64         | 237175 | 3.0 | 0.000113  |
| 1419295_at   | cAMP responsive element binding protein 3-like 1               | Creb3l1       | 26427  | 2.9 | 0.0012796 |
| 1455366_at   | mitochondrial ribosomal protein L52                            | Mrpl52        | 68836  | 2.9 | 0.0052802 |
| 1427944_at   | caprin family member 2                                         | Caprin2       | 232560 | 2.9 | 0.0003744 |
| 1418471_at   | placental growth factor                                        | Pgf           | 18654  | 2.9 | 0.0008519 |
| 1436704_x_at | methylenetetrahydrofolate dehydrogenase (NADP+ dependent), met | Mthfd1        | 108156 | 2.9 | 0.0031414 |
| 1432997_at   | RIKEN cDNA 5830462P14 gene                                     | 5830462P14Rik | 76098  | 2.8 | 0.0001408 |
| 1451540_at   | mannose phosphate isomerase                                    | Mpi           | 110119 | 2.8 | 0.0015676 |
| 1427797_s_at | predicted gene, EG665955                                       | EG665955      | 665955 | 2.8 | 0.0045715 |
| 1422803_at   | follistatin-like 3                                             | Fstl3         | 83554  | 2.8 | 0.0004976 |
| 1441272_at   | Matrin 3, mRNA (cDNA clone MGC:28206 IMAGE:3989914)            | Matr3         | 17184  | 2.8 | 0.0133686 |
| 1455843_at   | fucosyltransferase 4                                           | Fut4          | 14345  | 2.8 | 0.0007358 |
| 1419288_at   | junction adhesion molecule 2                                   | Jam2          | 67374  | 2.8 | 0.0007891 |
| 1428112_at   | arginine-rich, mutated in early stage tumors                   | Armet         | 74840  | 2.8 | 0.0001181 |

|              |                                                                        |         |        |     |           |
|--------------|------------------------------------------------------------------------|---------|--------|-----|-----------|
| 1428942_at   | metallothionein 2                                                      | Mt2     | 17750  | 2.8 | 1.968E-05 |
| 1437308_s_at | coagulation factor II (thrombin) receptor                              | F2r     | 14062  | 2.8 | 0.0002192 |
| 1450742_at   | bystin-like                                                            | Bysl    | 53414  | 2.8 | 0.0009616 |
| 1420295_x_at | chloride channel 5                                                     | Clcn5   | 12728  | 2.8 | 0.0007223 |
| 1428074_at   | transmembrane protein 158                                              | Tmem158 | 72309  | 2.7 | 0.0006869 |
| 1415860_at   | karyopherin (importin) alpha 2                                         | Kpna2   | 16647  | 2.7 | 0.0026484 |
| 1422443_at   | X-prolyl aminopeptidase (aminopeptidase P) 1, soluble                  | Xpnpep1 | 170750 | 2.7 | 0.0002102 |
| 1420819_at   | src-like adaptor                                                       | Sla     | 20491  | 2.7 | 0.0057103 |
| 1437401_at   | insulin-like growth factor 1                                           | Igf1    | 16000  | 2.7 | 0.0006416 |
| 1434601_at   | adhesion molecule with Ig like domain 2                                | Amigo2  | 105827 | 2.6 | 0.0005141 |
| 1418746_at   | paroxysmal nonkinesigenic dyskinesia                                   | Pnkd    | 56695  | 2.6 | 2.429E-05 |
| 1432418_a_at | creatine kinase, mitochondrial 1, ubiquitous                           | Ckmt1   | 12716  | 2.6 | 0.0023118 |
| 1447272_s_at | ATPase, class V, type 10A                                              | Atp10a  | 11982  | 2.6 | 0.0003571 |
| 1448945_at   | plasma membrane proteolipid                                            | Plip    | 67801  | 2.6 | 0.0003529 |
| 1423920_at   | non-SMC condensin I complex, subunit H                                 | Ncaph   | 215387 | 2.6 | 0.0053856 |
| 1450131_a_at | B-box and SPRY domain containing                                       | Bspry   | 192120 | 2.6 | 0.0014233 |
| 1434651_a_at | claudin 3                                                              | Cldn3   | 12739  | 2.6 | 0.0001996 |
| 1431422_a_at | dual specificity phosphatase 14                                        | Dusp14  | 56405  | 2.6 | 0.0013296 |
| 1453181_x_at | phospholipid scramblase 1                                              | Plscr1  | 22038  | 2.6 | 0.0007042 |
| 1421926_at   | mitogen-activated protein kinase 11                                    | Mapk11  | 19094  | 2.6 | 0.0001529 |
| 1428737_s_at | GRAM domain containing 3                                               | Gramd3  | 107022 | 2.6 | 0.0011913 |
| 1429527_a_at | phospholipid scramblase 1                                              | Plscr1  | 22038  | 2.6 | 0.0004068 |
| 1451895_a_at | 24-dehydrocholesterol reductase                                        | Dhcr24  | 74754  | 2.6 | 0.0021388 |
| 1424843_a_at | growth arrest specific 5                                               | Gas5    | 14455  | 2.6 | 0.0058248 |
| 1425255_s_at | heterogeneous nuclear ribonucleoprotein L-like                         | Hnrpll  | 72692  | 2.6 | 7.043E-05 |
| 1423569_at   | glycine amidinotransferase (L-arginine:glycine amidinotransferase)     | Gatm    | 67092  | 2.5 | 0.0001448 |
| 1431335_a_at | WAP four-disulfide core domain 1                                       | Wfdc1   | 67866  | 2.5 | 0.0007013 |
| 1455965_at   | a disintegrin-like and metallopeptidase (reprolysin type) with thrombo | Adamts4 | 240913 | 2.5 | 0.013299  |
| 1422557_s_at | metallothionein 1                                                      | Mt1     | 17748  | 2.5 | 7.664E-05 |
| 1417884_at   | solute carrier family 16 (monocarboxylic acid transporters), member 6  | Slc16a6 | 104681 | 2.5 | 5.802E-05 |
| 1436448_a_at | prostaglandin-endoperoxide synthase 1                                  | Ptgs1   | 19224  | 2.5 | 0.0009256 |
| 1437965_at   | HEAT repeat containing 1                                               | Heatr1  | 217995 | 2.5 | 0.0064112 |
| 1432579_at   | radial spokehead-like 2A                                               | Rshl2a  | 66832  | 2.5 | 0.0004951 |
| 1454953_at   | ring finger protein 157                                                | Rnf157  | 217340 | 2.5 | 0.0002284 |
| 1431295_a_at | syntaxin 18                                                            | Stx18   | 71116  | 2.5 | 0.000986  |
| 1416998_at   | RRS1 ribosome biogenesis regulator homolog (S. cerevisiae)             | Rrs1    | 59014  | 2.5 | 0.0004949 |
| 1439030_at   | GDP-mannose pyrophosphorylase B                                        | Gmpppb  | 331026 | 2.5 | 0.0002554 |

|              |                                                                 |               |        |     |           |
|--------------|-----------------------------------------------------------------|---------------|--------|-----|-----------|
| 1436707_x_at | non-SMC condensin I complex, subunit H                          | Ncaph         | 215387 | 2.5 | 0.0023342 |
| 1441831_x_at | Chloride channel 5, mRNA (cDNA clone MGC:35965 IMAGE:398981)    | Clcn5         | 12728  | 2.5 | 0.0004842 |
| 1451701_x_at | claudin 3                                                       | Cldn3         | 12739  | 2.5 | 0.0001576 |
| 1419365_at   | peroxisomal biogenesis factor 11 alpha                          | Pex11a        | 18631  | 2.5 | 0.0001173 |
| 1452445_at   | Mus musculus, clone IMAGE:3980872, mRNA                         | Slc41a2       | 338365 | 2.5 | 0.0007233 |
| 1430491_at   | block of proliferation 1                                        | Bop1          | 12181  | 2.4 | 0.0143416 |
| 1460569_x_at | claudin 3                                                       | Cldn3         | 12739  | 2.4 | 0.0003078 |
| 1448270_at   | DEAD (Asp-Glu-Ala-Asp) box polypeptide 21                       | Ddx21         | 56200  | 2.4 | 0.0002344 |
| 1418206_at   | stromal cell-derived factor 2-like 1                            | Sdf2l1        | 64136  | 2.4 | 0.0005883 |
| 1423643_at   | DEAD (Asp-Glu-Ala-Asp) box polypeptide 39                       | Ddx39         | 68278  | 2.4 | 0.0004881 |
| 1426037_a_at | regulator of G-protein signaling 16                             | Rgs16         | 19734  | 2.4 | 0.0069309 |
| 1451293_at   | RRP9, small subunit (SSU) processome component, homolog (yeast) | Rrp9          | 27966  | 2.4 | 0.0005263 |
| 1435737_a_at | nuclear distribution gene E homolog 1 (A nidulans)              | Nde1          | 67203  | 2.4 | 0.0002322 |
| 1419519_at   | insulin-like growth factor 1                                    | Igf1          | 16000  | 2.4 | 0.0010337 |
| 1455667_at   | prolactin regulatory element binding                            | Preb          | 50907  | 2.4 | 0.0029301 |
| 1449110_at   | ras homolog gene family, member B                               | Rhob          | 11852  | 2.4 | 0.0018396 |
| 1454659_at   | dCMP deaminase                                                  | Dctd          | 320685 | 2.4 | 0.0064045 |
| 1428562_at   | RIKEN cDNA 2210403K04 gene                                      | 2210403K04Rik | 67098  | 2.4 | 0.0071241 |
| 1460012_at   | WAP four-disulfide core domain 3                                | Wfdc3         | 71856  | 2.4 | 0.0012746 |
| 1450017_at   | cyclin G1                                                       | Ccng1         | 12450  | 2.4 | 0.0001975 |
| 1416235_at   | leucine rich repeat containing 59                               | Lrrc59        | 98238  | 2.4 | 0.0006014 |
| 1450735_at   | partner of NOB1 homolog (S. cerevisiae)                         | Pno1          | 66249  | 2.4 | 0.0013176 |
| 1449442_at   | peroxisomal biogenesis factor 11 alpha                          | Pex11a        | 18631  | 2.4 | 0.0003243 |
| 1429792_at   | RIKEN cDNA 9530048O09 gene                                      | 9530048O09Rik | 78611  | 2.3 | 0.0003046 |
| 1455904_at   | growth arrest specific 5                                        | Gas5          | 14455  | 2.3 | 0.0032281 |
| 1430111_a_at | branched chain aminotransferase 1, cytosolic                    | Bcat1         | 12035  | 2.3 | 0.0136948 |
| 1426332_a_at | claudin 3                                                       | Cldn3         | 12739  | 2.3 | 0.0002137 |
| 1420406_at   | paternally expressed 12                                         | Peg12         | 27412  | 2.3 | 0.001833  |
| 1455814_x_at | DEAD (Asp-Glu-Ala-Asp) box polypeptide 39                       | Ddx39         | 68278  | 2.3 | 0.0002803 |
| 1455402_at   | suppressor of cytokine signaling 7                              | Socs7         | 192157 | 2.3 | 8.518E-05 |
| 1417212_at   | RIKEN cDNA 9530058B02 gene                                      | 9530058B02Rik | 68241  | 2.3 | 0.0002942 |
| 1437373_at   | apoptosis enhancing nuclease                                    | Aen           | 68048  | 2.3 | 0.0010602 |
| 1438168_x_at | DEAD (Asp-Glu-Ala-Asp) box polypeptide 39                       | Ddx39         | 68278  | 2.3 | 0.0002141 |
| 1449044_at   | eukaryotic translation elongation factor 1 epsilon 1            | Eef1e1        | 66143  | 2.3 | 0.0001407 |
| 1448568_a_at | solute carrier family 20, member 1                              | Slc20a1       | 20515  | 2.3 | 0.0006754 |
| 1452661_at   | transferrin receptor                                            | Tfrc          | 22042  | 2.3 | 0.0003439 |
| 1424882_a_at | 5'-nucleotidase domain containing 2                             | Nt5dc2        | 70021  | 2.3 | 0.0015021 |

|              |                                                                         |               |        |     |           |
|--------------|-------------------------------------------------------------------------|---------------|--------|-----|-----------|
| 1426958_at   | ribosomal protein S9                                                    | Rps9          | 76846  | 2.3 | 0.0022208 |
| 1434165_at   | chloride intracellular channel 6                                        | Clic6         | 209195 | 2.3 | 0.0016377 |
| 1453745_at   | RIKEN cDNA 2700038G22 gene                                              | 2700038G22Rik | 67194  | 2.3 | 0.0010628 |
| 1426381_at   | peroxisome proliferative activated receptor, gamma, coactivator-related | Pprc1         | 226169 | 2.3 | 0.0006374 |
| 1450016_at   | cyclin G1                                                               | Ccng1         | 12450  | 2.3 | 7.478E-05 |
| 1434427_a_at | ring finger protein 157                                                 | Rnf157        | 217340 | 2.3 | 0.0009043 |
| 1450627_at   | progressive ankylosis                                                   | Ank           | 11732  | 2.3 | 0.0001541 |
| 1454197_a_at | coiled-coil domain containing 86                                        | Ccdc86        | 108673 | 2.3 | 0.0004644 |
| 1440786_x_at | Sideroflexin 2, mRNA (cDNA clone MGC:30418 IMAGE:5043343)               | Sfxn2         | 94279  | 2.3 | 0.0014282 |
| 1450506_a_at | apoptosis enhancing nuclease                                            | Aen           | 68048  | 2.3 | 0.0015963 |
| 1434653_at   | PTK2 protein tyrosine kinase 2 beta                                     | Ptk2b         | 19229  | 2.3 | 0.0033449 |
| 1453135_at   | fibronectin type III domain containing 5                                | Fndc5         | 384061 | 2.2 | 0.00707   |
| 1423414_at   | prostaglandin-endoperoxide synthase 1                                   | Ptgs1         | 19224  | 2.2 | 0.0020454 |
| 1426813_at   | LTV1 homolog (S. cerevisiae)                                            | Ltv1          | 353258 | 2.2 | 0.0001886 |
| 1456865_x_at | RRS1 ribosome biogenesis regulator homolog (S. cerevisiae)              | Rrs1          | 59014  | 2.2 | 0.0001098 |
| 1424522_at   | HEAT repeat containing 1                                                | Heatr1        | 217995 | 2.2 | 9.424E-05 |
| 1423685_at   | alanyl-tRNA synthetase                                                  | Aars          | 234734 | 2.2 | 6.768E-05 |
| 1434188_at   | solute carrier family 16 (monocarboxylic acid transporters), member 12  | Slc16a12      | 240638 | 2.2 | 0.0017056 |
| 1418079_at   | proteasome (prosome, macropain) 28 subunit, 3                           | Psme3         | 19192  | 2.2 | 0.0008349 |
| 1436222_at   | growth arrest specific 5                                                | Gas5          | 14455  | 2.2 | 0.0124395 |
| 1427923_at   | zinc metalloproteinase, STE24 homolog (S. cerevisiae)                   | Zmpste24      | 230709 | 2.2 | 0.0001651 |
| 1423566_a_at | heat shock 105kDa/110kDa protein 1                                      | Hsph1         | 15505  | 2.2 | 0.0012556 |
| 1419058_at   | polymerase (RNA) I polypeptide E                                        | Polr1e        | 64424  | 2.2 | 0.0007991 |
| 1425011_x_at | syntaxin 18                                                             | Stx18         | 71116  | 2.2 | 0.0007573 |
| 1437870_at   | solute carrier organic anion transporter family, member 4C1             | Slco4c1       | 227394 | 2.2 | 0.0020248 |
| 1455266_at   | kinesin family member 5C                                                | Kif5c         | 16574  | 2.2 | 0.0014915 |
| 1451065_a_at | DEAD (Asp-Glu-Ala-Asp) box polypeptide 39                               | Ddx39         | 68278  | 2.2 | 2.47E-05  |
| 1450846_at   | basic leucine zipper and W2 domains 1                                   | Bzw1          | 66882  | 2.2 | 0.0040335 |
| 1441776_at   | tetraspanin 11                                                          | Tspan11       | 68498  | 2.2 | 0.0013147 |
| 1427144_at   | heterogeneous nuclear ribonucleoprotein L-like                          | Hnrpll        | 72692  | 2.2 | 1.668E-05 |
| 1417890_at   | pyridoxal (pyridoxine, vitamin B6) phosphatase                          | Pdpx          | 57028  | 2.2 | 0.000101  |
| 1436136_at   | nucleolar complex associated 2 homolog (S. cerevisiae)                  | Noc2l         | 57741  | 2.2 | 0.0030477 |
| 1429288_x_at | syntaxin 18                                                             | Stx18         | 71116  | 2.2 | 0.0001277 |
| 1438018_at   | hook homolog 1 (Drosophila)                                             | Hook1         | 77963  | 2.2 | 0.0003223 |
| 1422484_at   | cytochrome c, somatic                                                   | Cycc          | 13063  | 2.2 | 0.0003205 |
| 1427055_at   | thioesterase superfamily member 4                                       | Them4         | 75778  | 2.2 | 0.0018643 |
| 1416316_at   | solute carrier family 27 (fatty acid transporter), member 2             | Slc27a2       | 26458  | 2.2 | 3.516E-05 |



|              |                                                                         |               |        |     |           |
|--------------|-------------------------------------------------------------------------|---------------|--------|-----|-----------|
| 1450871_a_at | branched chain aminotransferase 1, cytosolic                            | Bcat1         | 12035  | 2.2 | 0.0031997 |
| 1452414_s_at | coiled-coil domain containing 86                                        | Ccdc86        | 108673 | 2.2 | 0.0002273 |
| 1457292_at   | TATA box binding protein (Tbp)-associated factor, RNA polymerase        | Taf1d         | 75316  | 2.2 | 0.003597  |
| 1453819_x_at | syntaxin 18                                                             | Stx18         | 71116  | 2.2 | 0.0010496 |
| 1426649_at   | transmembrane protein with EGF-like and two follistatin-like domains    | Tmeff1        | 230157 | 2.2 | 0.0013286 |
| 1435115_at   | fibronectin type III domain containing 5                                | Fndc5         | 384061 | 2.2 | 0.0024486 |
| 1455035_s_at | NOP56 ribonucleoprotein homolog (yeast)                                 | Nop56         | 67134  | 2.2 | 0.0004234 |
| 1427095_at   | CUB domain containing protein 1                                         | Cdcp1         | 109332 | 2.2 | 0.0019255 |
| 1427997_at   | NADH dehydrogenase (ubiquinone) 1 alpha subcomplex, assembly f          | Ndufaf4       | 68493  | 2.2 | 0.0007356 |
| 1428223_at   | major facilitator superfamily domain containing 2                       | Mfsd2         | 76574  | 2.2 | 0.007245  |
| 1455878_at   | RIKEN cDNA 2700023E23 gene                                              | 2700023E23Rik | 70036  | 2.2 | 0.0022543 |
| 1422733_at   | four jointed box 1 (Drosophila)                                         | Fjx1          | 14221  | 2.2 | 7.425E-05 |
| 1428048_at   | cDNA sequence BC027582                                                  | BC027582      | 269472 | 2.2 | 0.0043091 |
| 1423784_at   | glycyl-tRNA synthetase                                                  | Gars          | 353172 | 2.2 | 0.0001003 |
| 1449233_at   | basic helix-loop-helix family, member a15                               | Bhlha15       | 17341  | 2.1 | 0.0003    |
| 1417422_at   | glycine N-methyltransferase                                             | Gnmt          | 14711  | 2.1 | 0.0003045 |
| 1451406_a_at | proprotein convertase subtilisin/kexin type 5                           | Pcsk5         | 18552  | 2.1 | 0.0013889 |
| 1416346_at   | translocase of inner mitochondrial membrane 8 homolog a1 (yeast)        | Timm8a1       | 30058  | 2.1 | 0.0014741 |
| 1433576_at   | methionine adenosyltransferase II, alpha                                | Mat2a         | 232087 | 2.1 | 6.581E-05 |
| 1460742_at   | asparagine-linked glycosylation 3 homolog (yeast, alpha-1,3-mannos      | Alg3          | 208624 | 2.1 | 0.0025942 |
| 1434154_at   | potassium channel tetramerisation domain containing 13                  | Kctd13        | 233877 | 2.1 | 9.422E-05 |
| 1423136_at   | fibroblast growth factor 1                                              | Fgf1          | 14164  | 2.1 | 0.0017663 |
| 1429169_at   | RNA binding motif protein 3                                             | Rbm3          | 19652  | 2.1 | 0.0054357 |
| 1422789_at   | aldehyde dehydrogenase family 1, subfamily A2                           | Aldh1a2       | 19378  | 2.1 | 0.0043158 |
| 1417629_at   | proline dehydrogenase                                                   | Prodh         | 19125  | 2.1 | 2.273E-05 |
| 1433739_at   | nucleolar protein 10                                                    | Nol10         | 217431 | 2.1 | 0.0001203 |
| 1436874_x_at | solute carrier family 25 (mitochondrial carrier, adenine nucleotide tra | Slc25a5       | 11740  | 2.1 | 0.0007874 |
| 1426426_at   | MAK16 homolog (S. cerevisiae)                                           | Mak16         | 67920  | 2.1 | 0.0003456 |
| 1423823_at   | MRT4, mRNA turnover 4, homolog (S. cerevisiae)                          | Mrto4         | 69902  | 2.1 | 0.0001158 |
| 1416234_at   | leucine rich repeat containing 59                                       | Lrrc59        | 98238  | 2.1 | 7.83E-05  |
| 1449853_at   | sideroflexin 2                                                          | Sfxn2         | 94279  | 2.1 | 0.0027659 |
| 1435102_a_at | syntaxin 18                                                             | Stx18         | 71116  | 2.1 | 0.0001682 |
| 1450769_s_at | StAR-related lipid transfer (START) domain containing 5                 | Stard5        | 170460 | 2.1 | 0.0027165 |
| 1415807_s_at | splicing factor, arginine/serine-rich 2 (SC-35)                         | Sfrs2         | 20382  | 2.1 | 0.0053886 |
| 1424824_at   | SLAIN motif family, member 1                                            | Slain1        | 105439 | 2.1 | 0.000146  |
| 1434801_x_at | solute carrier family 25 (mitochondrial carrier, adenine nucleotide tra | Slc25a5       | 11740  | 2.1 | 0.0024592 |
| 1435655_at   | ribosomal protein L12                                                   | Rpl12         | 269261 | 2.1 | 0.001493  |

|              |                                                     |               |        |     |           |
|--------------|-----------------------------------------------------|---------------|--------|-----|-----------|
| 1425921_a_at | RIKEN cDNA 1810055G02 gene                          | 1810055G02Rik | 72056  | 2.1 | 0.0002767 |
| 1426533_at   | NOP56 ribonucleoprotein homolog (yeast)             | Nop56         | 67134  | 2.1 | 0.0005349 |
| 1415828_a_at | stress-associated endoplasmic reticulum protein 1   | Serp1         | 28146  | 2.1 | 0.0055339 |
| 1438036_x_at | family with sequence similarity 82, member A1       | Fam82a1       | 381110 | 2.1 | 0.0046407 |
| 1416481_s_at | HIG1 domain family, member 1A                       | Higd1a        | 56295  | 2.1 | 7.809E-05 |
| 1451026_at   | FtsJ homolog 3 (E. coli)                            | Ftsj3         | 56095  | 2.1 | 0.0002499 |
| 1454236_a_at | family with sequence similarity 118, member B       | Fam118b       | 109229 | 2.1 | 0.001227  |
| 1429165_at   | RIKEN cDNA 3110001I22 gene                          | 3110001I22Rik | 66598  | 2.1 | 0.0025147 |
| 1450087_a_at | nucleolar and coiled-body phosphoprotein 1          | Nolc1         | 70769  | 2.1 | 0.0091971 |
| 1428864_at   | RIKEN cDNA 5530400B01 gene                          | 5530400B01Rik | 71434  | 2.1 | 0.0052162 |
| 1454963_at   | RIKEN cDNA E430028B21 gene                          | E430028B21Rik | 211948 | 2.1 | 0.000224  |
| 1456335_at   | gene model 106, (NCBI)                              | Gm106         | 226866 | 2.1 | 0.0089371 |
| 1448350_at   | argininosuccinate lyase                             | Asl           | 109900 | 2.1 | 0.0010637 |
| 1428736_at   | GRAM domain containing 3                            | Gramd3        | 107022 | 2.0 | 0.0002364 |
| 1423158_at   | glucosamine-phosphate N-acetyltransferase 1         | Gnpnat1       | 54342  | 2.0 | 0.004012  |
| 1436312_at   | IKAROS family zinc finger 1                         | Ikzf1         | 22778  | 2.0 | 0.002334  |
| 1447475_at   | gene model 967, (NCBI)                              | Gm967         | 381217 | 2.0 | 0.0001509 |
| 1440400_at   | ring finger protein 157                             | Rnf157        | 217340 | 2.0 | 0.0076112 |
| 1444872_at   | DNA segment, Chr 3, ERATO Doi 740, expressed        | D3Ert740e     | 51936  | 2.0 | 0.0090821 |
| 1451083_s_at | alanyl-tRNA synthetase                              | Aars          | 234734 | 2.0 | 0.0008324 |
| 1433502_s_at | TSR1, 20S rRNA accumulation, homolog (yeast)        | Tsr1          | 104662 | 2.0 | 4.409E-05 |
| 1423933_a_at | RIKEN cDNA 1600029D21 gene                          | 1600029D21Rik | 76509  | 2.0 | 0.0056108 |
| 1447822_x_at | UFM1-specific peptidase 1                           | Ufsp1         | 70240  | 2.0 | 0.0004649 |
| 1456702_x_at | methionine adenosyltransferase II, alpha            | Mat2a         | 232087 | 2.0 | 0.000575  |
| 1455643_s_at | TSR1, 20S rRNA accumulation, homolog (yeast)        | Tsr1          | 104662 | 2.0 | 0.0001475 |
| 1449012_s_at | fibronectin type III domain containing 4            | Fndc4         | 64339  | 2.0 | 0.0024801 |
| 1447930_at   | bromodomain adjacent to zinc finger domain 1A       | Baz1a         | 217578 | 2.0 | 0.0013207 |
| 1450029_s_at | integrin alpha 9                                    | Itga9         | 104099 | 2.0 | 0.0028537 |
| 1423151_at   | DnaJ (Hsp40) homolog, subfamily B, member 11        | Dnajb11       | 67838  | 2.0 | 0.0001225 |
| 1416411_at   | glutathione S-transferase, mu 2                     | Gstm2         | 14863  | 2.0 | 0.0009453 |
| 1454838_s_at | protein kinase domain containing, cytoplasmic       | Pkdcc         | 106522 | 2.0 | 0.002528  |
| 1423957_at   | apoptosis enhancing nuclease                        | Aen           | 68048  | 2.0 | 1.936E-05 |
| 1434744_at   | yrdC domain containing (E.coli)                     | Yrdc          | 230734 | 2.0 | 0.0002114 |
| 1447683_x_at | methyltransferase like 1                            | Mettl1        | 17299  | 2.0 | 0.000402  |
| 1433962_at   | tRNA methyltransferase 61 homolog A (S. cerevisiae) | Trmt61a       | 328162 | 2.0 | 5.452E-05 |
| 1429363_at   | vacuolar protein sorting 37A (yeast)                | Vps37a        | 52348  | 2.0 | 0.0078263 |
| 1419046_at   | brain protein 16                                    | Brp16         | 59053  | 2.0 | 0.0009618 |

|              |                                                                           |               |        |     |           |
|--------------|---------------------------------------------------------------------------|---------------|--------|-----|-----------|
| 1417627_a_at | LIM-domain containing, protein kinase                                     | Limk1         | 16885  | 2.0 | 0.0009106 |
| 1443869_at   | RIKEN cDNA E430028B21 gene                                                | E430028B21Rik | 211948 | 2.0 | 4.375E-05 |
| 1416345_at   | translocase of inner mitochondrial membrane 8 homolog a1 (yeast)          | Timm8a1       | 30058  | 2.0 | 0.0003013 |
| 1454817_at   | UTP18, small subunit (SSU) processome component, homolog (yeast)          | Utp18         | 217109 | 2.0 | 0.0002952 |
| 1419609_at   | chemokine (C-C motif) receptor 1                                          | Ccr1          | 12768  | 3.0 | 0.001721  |
| 1416129_at   | ERBB receptor feedback inhibitor 1                                        | Errfi1        | 74155  | 3.0 | 0.004232  |
| 1433966_x_at | asparagine synthetase                                                     | Asns          | 27053  | 2.8 | 0.0001675 |
| 1425225_at   | Fc receptor, IgG, low affinity IV                                         | Fcgr4         | 246256 | 2.8 | 0.0092322 |
| 1453486_a_at | signal peptide, CUB domain, EGF-like 2                                    | Scube2        | 56788  | 2.7 | 0.0014993 |
| 1416939_at   | pyrophosphatase (inorganic) 1                                             | Ppa1          | 67895  | 2.7 | 0.0001761 |
| 1448918_at   | solute carrier organic anion transporter family, member 3a1               | Slco3a1       | 108116 | 2.7 | 3.093E-06 |
| 1447928_at   | carbonic anhydrase 5b, mitochondrial                                      | Car5b         | 56078  | 2.7 | 0.0017906 |
| 1427347_s_at | tubulin, beta 2A                                                          | Tubb2a        | 22151  | 2.7 | 0.0002892 |
| 1418030_at   | solute carrier organic anion transporter family, member 3a1               | Slco3a1       | 108116 | 2.6 | 5.462E-05 |
| 1447851_x_at | ATPase, class V, type 10A                                                 | Atp10a        | 11982  | 2.6 | 4.721E-05 |
| 1419609_at   | asparagine synthetase                                                     | Asns          | 27053  | 2.6 | 4.915E-05 |
| 1416129_at   | ATPase, class V, type 10A                                                 | Atp10a        | 11982  | 2.5 | 0.0009165 |
| 1433966_x_at | BMP2 inducible kinase                                                     | Bmp2k         | 140780 | 2.5 | 0.0005552 |
| 1425225_at   | cytotoxic T lymphocyte-associated protein 2 beta                          | Ctla2b        | 13025  | 2.5 | 0.0009862 |
| 1453486_a_at | solute carrier organic anion transporter family, member 3a1               | Slco3a1       | 108116 | 2.5 | 4.606E-05 |
| 1416939_at   | gamma-glutamyl cyclotransferase                                           | Ggct          | 110175 | 2.5 | 3.569E-05 |
| 1448918_at   | topoisomerase (DNA) II alpha                                              | Top2a         | 21973  | 2.4 | 0.0067943 |
| 1447928_at   | ATPase, H+/K+ transporting, nongastric, alpha polypeptide                 | Atp12a        | 192113 | 2.4 | 0.0001009 |
| 1427347_s_at | hydrolethalus syndrome 1                                                  | Hyls1         | 76832  | 2.4 | 6.183E-05 |
| 1418030_at   | phosphatidylinositol-4-phosphate 5-kinase, type 1 beta                    | Pip5k1b       | 18719  | 2.4 | 0.0015547 |
| 1447851_x_at | protein tyrosine phosphatase-like (proline instead of catalytic arginine) | Ptplb         | 70757  | 2.4 | 0.0001163 |
| 1419609_at   | RIKEN cDNA 4932441K18 gene                                                | 4932441K18Rik | 353170 | 2.4 | 0.0050626 |
| 1416129_at   | DEAD (Asp-Glu-Ala-Asp) box polypeptide 21                                 | Ddx21         | 56200  | 2.4 | 0.0001891 |
| 1433966_x_at | DnaJ (Hsp40) homolog, subfamily C, member 24                              | Dnajc24       | 99349  | 2.4 | 0.0038165 |
| 1425225_at   | polymerase (RNA) I polypeptide E                                          | Polr1e        | 64424  | 2.3 | 0.0005806 |
| 1453486_a_at | paired immunoglobulin-like type 2 receptor alpha                          | Pilra         | 231805 | 2.3 | 0.0068571 |
| 1416939_at   | four jointed box 1 (Drosophila)                                           | Fjx1          | 14221  | 2.2 | 0.0006216 |
| 1448918_at   | cytotoxic T lymphocyte-associated protein 2 alpha                         | Ctla2a        | 13024  | 2.2 | 0.0007487 |
| 1447928_at   | platelet-activating factor acetylhydrolase, isoform 1b, subunit 2         | Pafah1b2      | 18475  | 2.2 | 0.0039035 |
| 1427347_s_at | regulator of chromosome condensation 1                                    | Rcc1          | 100088 | 2.2 | 0.0044107 |
| 1418030_at   | ATPase, class V, type 10B                                                 | Atp10b        | 319767 | 2.1 | 0.0090082 |
| 1447851_x_at | SET domain, bifurcated 2                                                  | Setdb2        | 239122 | 2.1 | 0.0006034 |

|              |                                                                              |               |        |     |           |
|--------------|------------------------------------------------------------------------------|---------------|--------|-----|-----------|
| 1419609_at   | acetyl-Coenzyme A carboxylase alpha                                          | Acaca         | 107476 | 2.1 | 0.0069709 |
| 1416129_at   | glucose-6-phosphate dehydrogenase X-linked                                   | G6pdx         | 14381  | 2.1 | 0.0019429 |
| 1433966_x_at | UDP-GlcNAc:betaGal beta-1,3-N-acetylglucosaminyltransferase 7                | B3gnt7        | 227327 | 2.1 | 0.003236  |
| 1425225_at   | aldehyde dehydrogenase family 1, subfamily A7                                | Aldh1a7       | 26358  | 2.1 | 0.0013151 |
| 1453486_a_at | cerebellar degeneration-related 2                                            | Cdr2          | 12585  | 2.1 | 0.0007777 |
| 1416939_at   | protein tyrosine phosphatase-like (proline instead of catalytic arginine)    | Ptplb         | 70757  | 2.1 | 0.0011267 |
| 1448918_at   | 3-phosphoglycerate dehydrogenase                                             | Phgdh         | 236539 | 2.1 | 0.000224  |
| 1447928_at   | nuclear receptor subfamily 4, group A, member 3                              | Nr4a3         | 18124  | 2.0 | 0.0004452 |
| 1427347_s_at | solute carrier family 1 (glutamate/neutral amino acid transporter), member 4 | Slc1a4        | 55963  | 2.0 | 0.0032062 |
| 1429778_at   | optineurin                                                                   | Optn          | 71648  | 2.0 | 0.0002063 |
| 1440910_at   | expressed sequence C77370                                                    | C77370        | 245555 | 2.0 | 0.0030666 |
| 1426937_at   | RIKEN cDNA 6330406115 gene                                                   | 6330406115Rik | 70717  | 2.0 | 0.0037823 |
| 1422768_at   | synaptotagmin binding, cytoplasmic RNA interacting protein                   | Syncrip       | 56403  | 2.0 | 0.0013075 |
| 1438035_at   | family with sequence similarity 82, member A1                                | Fam82a1       | 381110 | 2.0 | 0.0007237 |
| 1433815_at   | janus kinase and microtubule interacting protein 1                           | Jakmip1       | 76071  | 1.9 | 0.0039628 |
| 1435302_at   | TAF4B RNA polymerase II, TATA box binding protein (TBP)-associated factor 4B | Taf4b         | 72504  | 1.9 | 0.0001247 |
| 1433663_s_at | expressed sequence AU014645                                                  | AU014645      | 433702 | 1.9 | 0.0004176 |
| 1435252_at   | UDP-Gal:betaGal beta 1,3-galactosyltransferase, polypeptide 6                | B3galt6       | 117592 | 1.9 | 0.0013513 |
| 1419276_at   | ectonucleotide pyrophosphatase/phosphodiesterase 1                           | Enpp1         | 18605  | 1.9 | 0.0018458 |
| 1423061_at   | armadillo repeat gene deleted in velo-cardio-facial syndrome                 | Arvcf         | 11877  | 1.9 | 0.0002375 |
| 1435483_x_at | solute carrier family 25, member 32                                          | Slc25a32      | 69906  | 1.9 | 0.0040515 |
| 1455951_at   | methionine-tRNA synthetase                                                   | Mars          | 216443 | 1.9 | 3.202E-05 |
| 1458351_s_at | kelch-like 2, Mayven (Drosophila)                                            | Klhl2         | 77113  | 1.9 | 0.0019344 |
| 1419883_s_at | ATPase, H+ transporting, lysosomal V1 subunit B2                             | Atp6v1b2      | 11966  | 1.9 | 0.001869  |
| 1425179_at   | serine hydroxymethyltransferase 1 (soluble)                                  | Shmt1         | 20425  | 1.9 | 0.0076238 |
| 1424289_at   | oxidative stress induced growth inhibitor family member 2                    | Osgin2        | 209212 | 1.9 | 0.0011071 |
| 1419548_at   | karyopherin (importin) alpha 1                                               | Kpna1         | 16646  | 1.9 | 0.0006901 |
| 1415750_at   | transducin (beta)-like 3                                                     | Tbl3          | 213773 | 1.9 | 0.0005877 |
| 1424291_at   | nucleoporin 93                                                               | Nup93         | 71805  | 1.9 | 1.038E-05 |
| 1429642_at   | AN1, ubiquitin-like, homolog (Xenopus laevis)                                | Anub1         | 67492  | 1.8 | 0.0009242 |
| 1433567_at   | guanine monphosphate synthetase                                              | Gmps          | 229363 | 1.8 | 1.309E-05 |
| 1419674_a_at | dipeptidase 1 (renal)                                                        | Dpep1         | 13479  | 1.8 | 0.0040214 |
| 1431304_a_at | transmembrane protein 183A                                                   | Tmem183a      | 57439  | 1.8 | 0.0008331 |
| 1451679_at   | RIKEN cDNA 6530401D17 gene                                                   | 6530401D17Rik | 76219  | 1.8 | 0.0037181 |
| 1428870_at   | nucleolar and coiled-body phosphoprotein 1                                   | Nolc1         | 70769  | 1.8 | 1.83E-07  |
| 1426721_s_at | TCDD-inducible poly(ADP-ribose) polymerase                                   | Tiparp        | 99929  | 1.8 | 1.217E-05 |
| 1438133_a_at | cysteine rich protein 61                                                     | Cyr61         | 16007  | 1.8 | 0.0078885 |

|              |                                                                    |          |             |     |           |
|--------------|--------------------------------------------------------------------|----------|-------------|-----|-----------|
| 1421103_at   | BMP2 inducible kinase                                              | Bmp2k    | 140780      | 1.8 | 0.0058172 |
| 1425027_s_at | SFT2 domain containing 2                                           | Sft2d2   | 108735      | 1.8 | 0.0059772 |
| 1418078_at   | proteasome (prosome, macropain) 28 subunit, 3                      | Psme3    | 19192       | 1.8 | 0.0027086 |
| 1434748_at   | cytoskeleton associated protein 2                                  | Ckap2    | 80986       | 1.8 | 0.0083017 |
| 1416468_at   | aldehyde dehydrogenase family 1, subfamily A1                      | Aldh1a1  | 11668       | 1.8 | 0.0004701 |
| 1433482_a_at | far upstream element (FUSE) binding protein 1                      | Fubp1    | 51886       | 1.8 | 0.0024096 |
| 1427097_at   | WW domain containing E3 ubiquitin protein ligase 1                 | Wwp1     | 107568      | 1.7 | 0.0016657 |
| 1430596_s_at | vestigial like 3 (Drosophila)                                      | Vgll3    | 73569       | 1.7 | 0.0006253 |
| 1433531_at   | acyl-CoA synthetase long-chain family member 4                     | Acsl4    | 50790       | 1.7 | 0.0005594 |
| 1450722_at   | nucleoporin 50                                                     | Nup50    | 18141       | 1.7 | 0.002605  |
| 1448140_at   | cytokine induced apoptosis inhibitor 1                             | Ciapin1  | 109006      | 1.7 | 0.000309  |
| 1417301_at   | frizzled homolog 6 (Drosophila)                                    | Fzd6     | 14368       | 1.7 | 0.0020305 |
| 1423749_s_at | RAN GTPase activating protein 1                                    | Rangap1  | 19387       | 1.7 | 0.000589  |
| 1440303_at   | Solute carrier family 7, member 6 opposite strand (Slc7a6os), mRNA | Slc7a6os | 66432       | 1.7 | 0.0067796 |
| 1448171_at   | seven in absentia 2                                                | Siah2    | 20439       | 1.7 | 0.0025244 |
| 1448014_s_at | ubiquitin specific peptidase 24                                    | Usp24    | 329908      | 1.7 | 0.0037376 |
| 1452160_at   | TCDD-inducible poly(ADP-ribose) polymerase                         | Tiparp   | 99929       | 1.7 | 0.0005278 |
| 1426978_at   | kelch-like 2, Mayven (Drosophila)                                  | Klhl2    | 77113       | 1.7 | 9.241E-05 |
| 1451038_at   | apelin                                                             | Apln     | 30878       | 1.7 | 0.0089138 |
| 1437914_at   | E2F transcription factor 6                                         | E2f6     | 50496       | 1.7 | 0.0011699 |
| 1428095_a_at | C2 calcium-dependent domain containing 2-like                      | C2cd2l   | 71764       | 1.7 | 0.0010006 |
| 1450668_s_at | heat shock protein 1 (chaperonin 10)                               | Hspe1    | 15528       | 1.7 | 4.054E-05 |
| 1416249_at   | NAD kinase                                                         | Nadk     | 192185      | 1.7 | 0.0027008 |
| 1424290_at   | oxidative stress induced growth inhibitor family member 2          | Osgin2   | 209212      | 1.7 | 0.0029931 |
| 1460323_at   | threonyl-tRNA synthetase                                           | Tars     | 110960      | 1.7 | 0.0002058 |
| 1421499_a_at | protein tyrosine phosphatase, non-receptor type 14                 | Ptpn14   | 19250       | 1.7 | 0.0023614 |
| 1437932_a_at | claudin 1                                                          | Cldn1    | 12737       | 1.7 | 0.0006271 |
| 1440799_s_at | FERM, RhoGEF and pleckstrin domain protein 2                       | Farp2    | 227377      | 1.7 | 0.0031876 |
| 1455422_x_at | septin 4                                                           |          | 40060 18952 | 1.7 | 0.0069083 |
| 1419680_a_at | elaC homolog 2 (E. coli)                                           | Elac2    | 68626       | 1.7 | 0.0018207 |
| 1438170_x_at | adhesion regulating molecule 1                                     | Adrm1    | 56436       | 1.7 | 0.0039125 |
| 1428760_at   | small nuclear RNA activating complex, polypeptide 3                | Snopc3   | 77634       | 1.7 | 0.0040585 |
| 1437333_x_at | aldehyde dehydrogenase 18 family, member A1                        | Aldh18a1 | 56454       | 1.7 | 0.0005166 |
| 1416039_x_at | cysteine rich protein 61                                           | Cyr61    | 16007       | 1.7 | 0.0035544 |
| 1450743_s_at | synaptotagmin binding, cytoplasmic RNA interacting protein         | Syncrip  | 56403       | 1.7 | 0.0025328 |
| 1438962_s_at | DEAD/H (Asp-Glu-Ala-Asp/His) box polypeptide 31                    | Ddx31    | 227674      | 1.7 | 0.0004905 |
| 1447703_x_at | zinc finger protein 593                                            | Zfp593   | 68040       | 1.7 | 0.0011432 |

|              |                                                                             |               |        |     |           |
|--------------|-----------------------------------------------------------------------------|---------------|--------|-----|-----------|
| 1438725_at   | mediator complex subunit 13                                                 | Med13         | 327987 | 1.7 | 0.0021524 |
| 1449170_at   | piwi-like homolog 2 (Drosophila)                                            | Piwil2        | 57746  | 1.7 | 0.0019932 |
| 1418222_at   | RIKEN cDNA 2610024G14 gene                                                  | 2610024G14Rik | 56412  | 1.7 | 0.0013543 |
| 1431856_a_at | C1q and tumor necrosis factor related protein 6                             | C1qtnf6       | 72709  | 1.7 | 0.0004294 |
| 1416485_at   | translocase of inner mitochondrial membrane 23 homolog (yeast)              | Timm23        | 53600  | 1.7 | 0.0004091 |
| 1421321_a_at | neuroepithelial cell transforming gene 1                                    | Net1          | 56349  | 1.7 | 0.003258  |
| 1426932_at   | DNA segment, Chr 19, Brigham & Women's Genetics 1357 expressed              | D19Bwg1357e   | 52874  | 1.6 | 0.0059953 |
| 1455532_at   | ataxin 7-like 2                                                             | Atxn7l2       | 72522  | 1.6 | 0.0015059 |
| 1455985_x_at | serine hydroxymethyltransferase 2 (mitochondrial)                           | Shmt2         | 108037 | 1.6 | 0.0003718 |
| 1460329_at   | UDP-Gal:betaGlcNAc beta 1,4-galactosyltransferase, polypeptide 6, isoform 1 | B4galt6       | 56386  | 1.6 | 0.0014625 |
| 1451508_at   | La ribonucleoprotein domain family, member 2                                | Larp2         | 214048 | 1.6 | 0.0034046 |
| 1422577_at   | citrate synthase                                                            | Cs            | 12974  | 1.6 | 0.0048385 |
| 1430034_at   | chaperonin containing Tcp1, subunit 4 (delta)                               | Cct4          | 12464  | 1.6 | 0.0037063 |
| 1420888_at   | BCL2-like 1                                                                 | Bcl2l1        | 12048  | 1.6 | 0.0001969 |
| 1455149_at   | SH3 domain containing ring finger 1                                         | Sh3rf1        | 59009  | 1.6 | 0.0080908 |
| 1426002_a_at | cell division cycle 7 (S. cerevisiae)                                       | Cdc7          | 12545  | 1.6 | 0.0029065 |
| 1439442_x_at | tyrosyl-tRNA synthetase 2 (mitochondrial)                                   | Yars2         | 70120  | 1.6 | 0.0039426 |
| 1451346_at   | methylthioadenosine phosphorylase                                           | Mtap          | 66902  | 1.6 | 0.003689  |
| 1455896_a_at | potassium channel, subfamily K, member 1                                    | Kcnk1         | 16525  | 1.6 | 0.0057159 |
| 1421457_a_at | SAM domain, SH3 domain and nuclear localization signals, 1                  | Samsn1        | 67742  | 1.6 | 0.0012872 |
| 1460273_a_at | NLR family, apoptosis inhibitory protein 2                                  | Naip2         | 17948  | 1.6 | 0.005472  |
| 1417675_a_at | midasin homolog (yeast)                                                     | Mdn1          | 100019 | 1.6 | 0.0040521 |
| 1451092_a_at | RAN GTPase activating protein 1                                             | Rangap1       | 19387  | 1.6 | 0.0005757 |
| 1420936_s_at | cleavage and polyadenylation specific factor 2                              | Cpsf2         | 51786  | 1.6 | 0.0028228 |
| 1415697_at   | GTPase activating protein (SH3 domain) binding protein 2                    | G3bp2         | 23881  | 1.6 | 0.0015874 |
| 1437848_x_at | ADP-dependent glucokinase                                                   | Adpgk         | 72141  | 1.6 | 0.0015198 |
| 1423267_s_at | integrin alpha 5 (fibronectin receptor alpha)                               | Itga5         | 16402  | 1.6 | 0.0024397 |
| 1424065_at   | ER degradation enhancer, mannosidase alpha-like 1                           | Edem1         | 192193 | 1.6 | 0.0049102 |
| 1448013_at   | ubiquitin specific peptidase 24                                             | Usp24         | 329908 | 1.6 | 0.0015156 |
| 1416439_at   | dCTP pyrophosphatase 1                                                      | Dctpp1        | 66422  | 1.6 | 0.0056272 |
| 1424574_at   | transmembrane emp24 protein transport domain containing 5                   | Tmed5         | 73130  | 1.6 | 0.0033283 |
| 1425764_a_at | branched chain aminotransferase 2, mitochondrial                            | Bcat2         | 12036  | 1.6 | 0.0053528 |
| 1455368_at   | zinc finger, DHHC domain containing 3                                       | Zdhhc3        | 69035  | 1.6 | 0.0001088 |
| 1435679_at   | optineurin                                                                  | Optn          | 71648  | 1.6 | 0.0013481 |
| 1455084_x_at | serine hydroxymethyltransferase 2 (mitochondrial)                           | Shmt2         | 108037 | 1.6 | 0.0007509 |
| 1430134_a_at | tyrosyl-tRNA synthetase 2 (mitochondrial)                                   | Yars2         | 70120  | 1.6 | 0.0030876 |
| 1448690_at   | potassium channel, subfamily K, member 1                                    | Kcnk1         | 16525  | 1.6 | 0.0019007 |

|              |                                                                                |               |        |     |           |
|--------------|--------------------------------------------------------------------------------|---------------|--------|-----|-----------|
| 1434182_at   | DEAD/H (Asp-Glu-Ala-Asp/His) box polypeptide 31                                | Ddx31         | 227674 | 1.6 | 0.0059654 |
| 1434173_s_at | DNA segment, Chr 19, Brigham & Women's Genetics 1357 expressed                 | D19Bwg1357e   | 52874  | 1.6 | 0.0005934 |
| 1417254_at   | spermatogenesis associated 5                                                   | Spata5        | 57815  | 1.6 | 0.0003277 |
| 1455657_at   | SMG1 homolog, phosphatidylinositol 3-kinase-related kinase (C. elegans)        | Smg1          | 233789 | 1.6 | 0.0011798 |
| 1456728_x_at | aconitase 1                                                                    | Aco1          | 11428  | 1.6 | 0.0009262 |
| 1415836_at   | aldehyde dehydrogenase 18 family, member A1                                    | Aldh18a1      | 56454  | 1.6 | 0.000185  |
| 1423621_a_at | solute carrier family 33 (acetyl-CoA transporter), member 1                    | Slc33a1       | 11416  | 1.6 | 0.0001168 |
| 1452396_at   | splicing factor, arginine/serine-rich 15                                       | Sfrs15        | 224432 | 1.6 | 0.0023795 |
| 1435292_at   | TBC1 domain family, member 4                                                   | Tbc1d4        | 210789 | 1.6 | 0.0027643 |
| 1424556_at   | pyrroline-5-carboxylate reductase 1                                            | Pycr1         | 209027 | 1.6 | 0.001442  |
| 1438818_at   | NMD3 homolog (S. cerevisiae)                                                   | Nmd3          | 97112  | 1.6 | 0.0001896 |
| 1419169_at   | mitogen-activated protein kinase 6                                             | Mapk6         | 50772  | 1.6 | 0.0054162 |
| 1432184_a_at | RIKEN cDNA 2610204M08 gene                                                     | 2610204M08Rik | 70435  | 1.6 | 0.0012891 |
| 1417716_at   | glutamate oxaloacetate transaminase 2, mitochondrial                           | Got2          | 14719  | 1.6 | 0.004679  |
| 1435053_s_at | pleckstrin homology domain containing, family H (with MyTH4 domain)            | Plekhh1       | 211945 | 1.6 | 0.0056215 |
| 1456887_at   | chemokine-like receptor 1                                                      | Cmklr1        | 14747  | 1.6 | 0.0072223 |
| 1448968_at   | ubiquitin family domain containing 1                                           | Ubfd1         | 28018  | 1.6 | 0.0004144 |
| 1435103_x_at | phenylalanyl-tRNA synthetase, beta subunit                                     | Farsb         | 23874  | 1.6 | 0.0008627 |
| 1453593_at   | vestigial like 3 (Drosophila)                                                  | Vgll3         | 73569  | 1.5 | 0.0018804 |
| 1417270_at   | WD repeat domain 12                                                            | Wdr12         | 57750  | 1.5 | 0.0006084 |
| 1418903_at   | aquaporin 2                                                                    | Aqp2          | 11827  | 1.5 | 0.0096527 |
| 1433467_at   | solute carrier family 7 (cationic amino acid transporter, y+ system), member 6 | Slc7a6        | 330836 | 1.5 | 0.0024028 |
| 1417398_at   | related RAS viral (r-ras) oncogene homolog 2                                   | Rras2         | 66922  | 1.5 | 0.0030283 |
| 1424573_at   | transmembrane emp24 protein transport domain containing 5                      | Tmed5         | 73130  | 1.5 | 0.0048923 |
| 1435367_at   | mitogen-activated protein kinase 4                                             | Mapk4         | 225724 | 1.5 | 0.0009433 |
| 1449718_s_at | RIKEN cDNA 4930453N24 gene, mRNA (cDNA clone MGC:28305 IMAGE4930453)           | 4930453N24Rik | 67609  | 1.5 | 0.0001522 |
| 1423795_at   | splicing factor proline/glutamine rich (polypyrimidine tract binding protein)  | Sfpq          | 71514  | 1.5 | 0.0003666 |
| 1459973_x_at | dipeptidylpeptidase 4                                                          | Dpp4          | 13482  | 1.5 | 0.0006877 |
| 1427098_at   | WW domain containing E3 ubiquitin protein ligase 1                             | Wwp1          | 107568 | 1.5 | 0.0040013 |
| 1449211_at   | bisphosphate 3'-nucleotidase 1                                                 | Bpnt1         | 23827  | 1.5 | 0.0033986 |
| 1433894_at   | JAZF zinc finger 1                                                             | Jazf1         | 231986 | 1.5 | 0.0023844 |
| 1422461_at   | ATPase family, AAA domain containing 3A                                        | Atad3a        | 108888 | 1.5 | 0.0049868 |
| 1431349_at   | heterogeneous nuclear ribonucleoprotein A/B                                    | Hnrnpab       | 15384  | 1.5 | 0.00529   |
| 1423841_at   | brix domain containing 2                                                       | Bxdc2         | 67832  | 1.5 | 0.0008833 |
| 1423796_at   | splicing factor proline/glutamine rich (polypyrimidine tract binding protein)  | Sfpq          | 71514  | 1.5 | 0.0001943 |
| 1415933_a_at | cytochrome c oxidase, subunit Va                                               | Cox5a         | 12858  | 1.5 | 0.0003324 |
| 1424223_at   | RIKEN cDNA 1700020C11 gene                                                     | 1700020C11Rik | 67900  | 1.5 | 2.167E-06 |

|              |                                                                          |               |           |     |           |
|--------------|--------------------------------------------------------------------------|---------------|-----------|-----|-----------|
| 1441578_at   | coiled-coil domain containing 86                                         | Ccdc86        | 108673    | 1.5 | 0.006474  |
| 1439266_a_at | polymerase (RNA) III (DNA directed) polypeptide K                        | Polr3k        | 67005     | 1.5 | 0.0057007 |
| 1434306_at   | RAB3A interacting protein                                                | Rab3ip        | 216363    | 1.5 | 0.0009639 |
| 1457717_at   | expressed sequence AI987986                                              | AI987986      | 105573    | 1.5 | 0.0018962 |
| 1448175_at   | EH-domain containing 1                                                   | Ehd1          | 13660     | 1.5 | 0.0010567 |
| 1452274_at   | zinc finger, AN1-type domain 3                                           | Zfand3        | 21769     | 1.5 | 0.0011458 |
| 1416850_s_at | CDGSH iron sulfur domain 1                                               | Cisd1         | 52637     | 1.5 | 0.0007132 |
| 1434096_at   | solute carrier family 4 (anion exchanger), member 4                      | Slc4a4        | 54403     | 1.5 | 0.0021638 |
| 1432016_a_at | isocitrate dehydrogenase 3 (NAD+) alpha                                  | Idh3a         | 67834     | 1.5 | 0.0009757 |
| 1424193_at   | PWP2 periodic tryptophan protein homolog (yeast)                         | Pwp2          | 110816    | 1.5 | 0.0003645 |
| 1419162_s_at | DnaJ (Hsp40) homolog, subfamily C, member 3                              | Dnajc3        | 100037258 | 1.5 | 0.0007179 |
| 1430138_at   | CD3E antigen, epsilon polypeptide associated protein                     | Cd3eap        | 70333     | 1.5 | 0.0063663 |
| 1430289_a_at | WD repeat domain 77                                                      | Wdr77         | 70465     | 2.0 | 0.0122058 |
| 1423772_x_at | solute carrier family 25 (mitochondrial carrier, adenine nucleotide tran | Slc25a5       | 11740     | 2.0 | 0.0007405 |
| 1455841_s_at | glutamate-rich WD repeat containing 1                                    | Grwd1         | 101612    | 2.0 | 4.367E-06 |
| 1435896_at   | sideroflexin 2                                                           | Sfxn2         | 94279     | 2.0 | 0.0012142 |
| 1452171_at   | glutamate-rich WD repeat containing 1                                    | Grwd1         | 101612    | 2.0 | 2.524E-06 |
| 1448359_a_at | HIG1 domain family, member 1A                                            | Hig1a         | 56295     | 2.0 | 0.0004539 |
| 1455987_at   | Sec61 alpha 1 subunit ( <i>S. cerevisiae</i> )                           | Sec61a1       | 53421     | 2.0 | 0.0052743 |
| 1418207_at   | FXD domain-containing ion transport regulator 4                          | Fxd4          | 108017    | 2.0 | 0.0229159 |
| 1426645_at   | heat shock protein 90, alpha (cytosolic), class A member 1               | Hsp90aa1      | 15519     | 2.0 | 0.0060695 |
| 1454841_at   | URB1 ribosome biogenesis 1 homolog ( <i>S. cerevisiae</i> )              | Urb1          | 207932    | 2.0 | 0.0001394 |
| 1449390_at   | G patch domain containing 4                                              | Gpatch4       | 66614     | 2.0 | 0.0002157 |
| 1439155_at   | methyltransferase like 1                                                 | Mettl1        | 17299     | 2.0 | 0.0007225 |
| 1438976_x_at | methionine adenosyltransferase II, alpha                                 | Mat2a         | 232087    | 2.0 | 0.0002996 |
| 1433599_at   | bromodomain adjacent to zinc finger domain 1A                            | Baz1a         | 217578    | 2.0 | 0.0035117 |
| 1428869_at   | nucleolar and coiled-body phosphoprotein 1                               | Nolc1         | 70769     | 2.0 | 0.0004988 |
| 1452919_a_at | phosphoglycolate phosphatase                                             | Pgp           | 67078     | 2.0 | 0.0002775 |
| 1417874_at   | TMEM9 domain family, member B                                            | Tmem9b        | 56786     | 2.0 | 0.0001254 |
| 1438630_x_at | methionine adenosyltransferase II, alpha                                 | Mat2a         | 232087    | 2.0 | 0.0001701 |
| 1433530_at   | RIKEN cDNA 2210411K19 gene                                               | 2210411K19Rik | 70164     | 2.0 | 0.0052352 |
| 1460411_s_at | protein kinase domain containing, cytoplasmic                            | Pkdcc         | 106522    | 2.0 | 0.0002508 |
| 1443558_s_at | 5'-nucleotidase domain containing 3                                      | Nt5dc3        | 103466    | 2.0 | 0.0002775 |
| 1416911_a_at | akirin 1                                                                 | Akirin1       | 68050     | 2.0 | 0.0012878 |
| 1419613_at   | collagen, type VII, alpha 1                                              | Col7a1        | 12836     | 2.0 | 0.0046818 |
| 1435734_x_at | dihydrouridine synthase 1-like ( <i>S. cerevisiae</i> )                  | Dus1l         | 68730     | 2.0 | 0.0004539 |
| 1415814_at   | ATPase, H <sup>+</sup> transporting, lysosomal V1 subunit B2             | Atp6v1b2      | 11966     | 1.9 | 0.0009501 |



|              |                                                                        |               |        |     |           |
|--------------|------------------------------------------------------------------------|---------------|--------|-----|-----------|
| 1436887_x_at | glutamate-rich WD repeat containing 1                                  | Grwd1         | 101612 | 1.9 | 6.29E-06  |
| 1437658_a_at | small nucleolar RNA host gene (non-protein coding) 1                   | Snhg1         | 83673  | 1.9 | 0.0035109 |
| 1455285_at   | solute carrier family 31, member 1                                     | Slc31a1       | 20529  | 1.9 | 0.0059232 |
| 1425993_a_at | heat shock 105kDa/110kDa protein 1                                     | Hsph1         | 15505  | 1.9 | 0.0066452 |
| 1448604_at   | uridine-cytidine kinase 2                                              | Uck2          | 80914  | 1.9 | 0.001181  |
| 1444184_at   | alkB, alkylation repair homolog 3 (E. coli)                            | Alkbh3        | 69113  | 1.9 | 0.0129881 |
| 1455173_at   | G1 to S phase transition 1                                             | Gspt1         | 14852  | 1.9 | 0.0004151 |
| 1440120_at   | Guanine nucleotide binding protein (G protein), beta polypeptide 2 lik | Gnb2l1        | 14694  | 1.9 | 0.0011675 |
| 1435435_at   | cortactin binding protein 2                                            | Ctnbp2        | 30785  | 1.9 | 0.0008126 |
| 1423943_at   | dihydrouridine synthase 1-like (S. cerevisiae)                         | Dus1l         | 68730  | 1.9 | 0.000611  |
| 1427464_s_at | heat shock protein 5                                                   | Hspa5         | 14828  | 1.9 | 7.424E-05 |
| 1431179_at   | ectonucleoside triphosphate diphosphohydrolase 7                       | Entpd7        | 93685  | 1.9 | 0.0017338 |
| 1420827_a_at | cyclin G1                                                              | Ccng1         | 12450  | 1.9 | 0.0002465 |
| 1450642_at   | SECIS binding protein 2-like                                           | Secisbp2l     | 70354  | 1.9 | 3.297E-05 |
| 1432332_a_at | nudix (nucleoside diphosphate linked moiety X)-type motif 19           | Nudt19        | 110959 | 1.9 | 0.0008705 |
| 1424529_s_at | cell growth regulator with EF hand domain 1                            | Cgref1        | 68567  | 1.9 | 0.0028867 |
| 1452154_at   | isoleucine-tRNA synthetase                                             | lars          | 105148 | 1.9 | 0.0034131 |
| 1449424_at   | pleckstrin 2                                                           | Plek2         | 27260  | 1.9 | 0.000148  |
| 1433656_a_at | guanine nucleotide binding protein-like 3 (nucleolar)                  | Gnl3          | 30877  | 1.9 | 0.0009659 |
| 1450716_at   | a disintegrin-like and metallopeptidase (reprolysin type) with thrombo | Adamts1       | 11504  | 1.9 | 0.0032754 |
| 1448619_at   | 7-dehydrocholesterol reductase                                         | Dhcr7         | 13360  | 1.9 | 0.0033591 |
| 1417807_at   | UFM1-specific peptidase 1                                              | Ufsp1         | 70240  | 1.9 | 0.0039022 |
| 1423358_at   | endothelin converting enzyme 2                                         | Ece2          | 107522 | 1.9 | 0.0006394 |
| 1450232_at   | X-linked inhibitor of apoptosis                                        | Xiap          | 11798  | 1.9 | 2.964E-05 |
| 1428544_at   | RIKEN cDNA 0610007L01 gene                                             | 0610007L01Rik | 71667  | 1.9 | 0.000165  |
| 1450344_a_at | prostaglandin E receptor 3 (subtype EP3)                               | Ptger3        | 19218  | 1.9 | 3.049E-06 |
| 1455065_x_at | glucosamine-6-phosphate deaminase 1                                    | Gnpda1        | 26384  | 1.9 | 0.0019889 |
| 1436242_a_at | chemokine-like factor                                                  | Cklf          | 75458  | 1.9 | 0.0010319 |
| 1435283_s_at | gene model 967, (NCBI)                                                 | Gm967         | 381217 | 1.9 | 0.0003442 |
| 1431023_at   | RIKEN cDNA C030046E11 gene                                             | C030046E11Rik | 226089 | 1.9 | 0.0061395 |
| 1451733_at   | glucosaminyl (N-acetyl) transferase 2, I-branching enzyme              | Gcnt2         | 14538  | 1.9 | 0.0005695 |
| 1418911_s_at | acyl-CoA synthetase long-chain family member 4                         | Acsl4         | 50790  | 1.9 | 4.963E-05 |
| 1422708_at   | phosphoinositide-3-kinase, catalytic, gamma polypeptide                | Pik3cg        | 30955  | 1.9 | 0.00015   |
| 1432435_s_at | family with sequence similarity 118, member B                          | Fam118b       | 109229 | 1.9 | 0.0001044 |
| 1424822_at   | SLAIN motif family, member 1                                           | Slain1        | 105439 | 1.9 | 0.0048663 |
| 1424495_a_at | chemokine-like factor                                                  | Cklf          | 75458  | 1.9 | 0.0011033 |
| 1438326_at   | MKIAA1153 protein                                                      | Trmt6         | 66926  | 1.9 | 0.0101122 |

|              |                                                                           |               |        |     |           |
|--------------|---------------------------------------------------------------------------|---------------|--------|-----|-----------|
| 1451342_at   | spondin 1, (f-spondin) extracellular matrix protein                       | Spon1         | 233744 | 1.9 | 0.0029241 |
| 1431475_a_at | homeo box A10                                                             | Hoxa10        | 15395  | 1.9 | 0.0038812 |
| 1452583_s_at | galactose mutarotase                                                      | Galm          | 319625 | 1.9 | 0.0083477 |
| 1448543_at   | slowmo homolog 2 (Drosophila)                                             | Slmo2         | 66390  | 1.9 | 0.0024194 |
| 1460551_at   | RAN, member RAS oncogene family                                           | Ran           | 19384  | 1.9 | 0.0002771 |
| 1417499_at   | translocase of inner mitochondrial membrane 10 homolog (yeast)            | Timm10        | 30059  | 1.9 | 0.0003971 |
| 1419798_at   | RIKEN cDNA 2610019E17 gene                                                | 2610019E17Rik | 75614  | 1.9 | 0.0011686 |
| 1431893_a_at | prenyl (solanesyl) diphosphate synthase, subunit 1                        | Pdss1         | 56075  | 1.9 | 0.0043876 |
| 1450084_s_at | influenza virus NS1A binding protein                                      | Ivns1abp      | 117198 | 1.9 | 0.0003216 |
| 1451272_a_at | ubiquitin-conjugating enzyme E2F (putative)                               | Ube2f         | 67921  | 1.9 | 0.0001051 |
| 1438188_x_at | solute carrier family 25 (mitochondrial carrier, palmitoylcarnitine trans | Slc25a29      | 214663 | 1.9 | 0.0065259 |
| 1424174_at   | Sh3kbp1 binding protein 1                                                 | Shkbp1        | 192192 | 1.9 | 0.0018464 |
| 1450970_at   | glutamate oxaloacetate transaminase 1, soluble                            | Got1          | 14718  | 1.9 | 0.0040467 |
| 1448135_at   | activating transcription factor 4                                         | Atf4          | 11911  | 1.9 | 0.0001862 |
| 1436134_at   | sodium channel, voltage-gated, type II, beta                              | Scn2b         | 72821  | 1.9 | 0.0003916 |
| 1419122_at   | methyltransferase like 1                                                  | Mettl1        | 17299  | 1.9 | 0.0006961 |
| 1425718_a_at | influenza virus NS1A binding protein                                      | Ivns1abp      | 117198 | 1.8 | 0.0002116 |
| 1416064_a_at | heat shock protein 5                                                      | Hspa5         | 14828  | 1.8 | 3.928E-05 |
| 1448651_at   | nudix (nucleoside diphosphate linked moiety X)-type motif 5               | Nudt5         | 53893  | 1.8 | 0.0027963 |
| 1428487_s_at | coenzyme Q10 homolog B (S. cerevisiae)                                    | Coq10b        | 67876  | 1.8 | 0.0034191 |
| 1439966_x_at | sideroflexin 2                                                            | Sfxn2         | 94279  | 1.8 | 0.0021987 |
| 1454991_at   | solute carrier family 7 (cationic amino acid transporter, y+ system), m   | Slc7a1        | 11987  | 1.8 | 0.0002379 |
| 1452514_a_at | kit oncogene                                                              | Kit           | 16590  | 1.8 | 0.0012235 |
| 1438187_at   | solute carrier family 25 (mitochondrial carrier, palmitoylcarnitine trans | Slc25a29      | 214663 | 1.8 | 0.0145871 |
| 1448704_s_at | histocompatibility 47                                                     | H47           | 109815 | 1.8 | 6.419E-05 |
| 1460541_at   | solute carrier family 7 (cationic amino acid transporter, y+ system), m   | Slc7a6        | 330836 | 1.8 | 0.0008304 |
| 1434350_at   | cysteine-serine-rich nuclear protein 1                                    | Csrnp1        | 215418 | 1.8 | 7.594E-05 |
| 1448531_at   | lamin B2                                                                  | Lmnb2         | 16907  | 1.8 | 0.0004708 |
| 1419072_at   | glutathione S-transferase, mu 7                                           | Gstm7         | 68312  | 1.8 | 0.0047353 |
| 1423313_at   | phosphodiesterase 7A                                                      | Pde7a         | 18583  | 1.8 | 0.0045977 |
| 1427057_at   | 5'-nucleotidase domain containing 3                                       | Nt5dc3        | 103466 | 1.8 | 0.0005592 |
| 1455241_at   | cDNA sequence BC037703                                                    | BC037703      | 242125 | 1.8 | 0.0037628 |
| 1447122_at   | Proteasome (prosome, macropain) 26S subunit, non-ATPase, 1, mR            | Psmc1         | 70247  | 1.8 | 0.0065568 |
| 1448126_at   | family with sequence similarity 60, member A                              | Fam60a        | 56306  | 1.8 | 0.0001965 |
| 1435282_at   | gene model 967, (NCBI)                                                    | Gm967         | 381217 | 1.8 | 0.0009123 |
| 1451344_at   | transmembrane protein 119                                                 | Tmem119       | 231633 | 1.8 | 0.004667  |
| 1448413_at   | RIKEN cDNA 2410016O06 gene                                                | 2410016O06Rik | 71952  | 1.8 | 0.0001108 |

|              |                                                                                              |               |        |     |           |
|--------------|----------------------------------------------------------------------------------------------|---------------|--------|-----|-----------|
| 1430980_a_at | eukaryotic translation initiation factor 4A1                                                 | Eif4a1        | 13681  | 1.8 | 0.004279  |
| 1416912_at   | akirin 1                                                                                     | Akirin1       | 68050  | 1.8 | 0.0013641 |
| 1428010_at   | translocase of inner mitochondrial membrane 9 homolog (yeast)                                | Timm9         | 30056  | 1.8 | 0.0138846 |
| 1437007_x_at | ubiquitin specific peptidase 39                                                              | Usp39         | 28035  | 1.8 | 0.0001011 |
| 1416014_at   | ATP-binding cassette, sub-family E (OABP), member 1                                          | Abce1         | 24015  | 1.8 | 0.0003206 |
| 1452754_at   | cysteine-rich with EGF-like domains 2                                                        | Creld2        | 76737  | 1.8 | 0.0006498 |
| 1442071_at   | ATP-binding cassette, sub-family E (OABP), member 1                                          | Abce1         | 24015  | 1.8 | 0.0102481 |
| 1453149_at   | solute carrier family 25, member 32                                                          | Slc25a32      | 69906  | 1.8 | 0.0010183 |
| 1427504_s_at | splicing factor, arginine/serine-rich 2 (SC-35)                                              | Sfrs2         | 20382  | 1.8 | 0.0001688 |
| 1422579_at   | heat shock protein 1 (chaperonin 10)                                                         | Hspe1         | 15528  | 1.8 | 3.21E-05  |
| 1423291_s_at | hypoxia up-regulated 1                                                                       | Hyou1         | 12282  | 1.8 | 4.583E-05 |
| 1449946_a_at | zinc finger protein 593                                                                      | Zfp593        | 68040  | 1.8 | 0.0015362 |
| 1434710_at   | DEAH (Asp-Glu-Ala-His) box polypeptide 29                                                    | Dhx29         | 218629 | 1.8 | 0.0003897 |
| 1447724_x_at | optic atrophy 3 (human)                                                                      | Opa3          | 403187 | 1.8 | 0.0004383 |
| 1448480_at   | nuclear import 7 homolog ( <i>S. cerevisiae</i> )                                            | Nip7          | 66164  | 1.8 | 0.0003862 |
| 1416605_at   | NHP2 ribonucleoprotein homolog (yeast)                                                       | Nhp2          | 52530  | 1.8 | 0.0029129 |
| 1419205_x_at | G patch domain containing 4                                                                  | Gpatch4       | 66614  | 1.8 | 0.0006402 |
| 1426118_a_at | translocase of outer mitochondrial membrane 40 homolog (yeast)                               | Tomm40        | 53333  | 1.8 | 0.000759  |
| 1456037_x_at | prolactin regulatory element binding                                                         | Preb          | 50907  | 1.8 | 0.0023205 |
| 1432032_a_at | artemin                                                                                      | Artn          | 11876  | 1.8 | 0.0042718 |
| 1430062_at   | hedgehog interacting protein-like 1                                                          | Hhip1         | 214305 | 1.8 | 0.0046929 |
| 1455102_at   | La ribonucleoprotein domain family, member 4                                                 | Larp4         | 207214 | 1.8 | 0.0014529 |
| 1423040_at   | basic leucine zipper and W2 domains 1                                                        | Bzw1          | 66882  | 1.8 | 0.0005087 |
| 1420296_at   | Chloride channel 5, mRNA (cDNA clone MGC:35965 IMAGE:398981)                                 | Clcn5         | 12728  | 1.8 | 0.0003379 |
| 1435735_x_at | histocompatibility 47                                                                        | H47           | 109815 | 1.8 | 5.904E-06 |
| 1421845_at   | golgi phosphoprotein 3                                                                       | Golph3        | 66629  | 1.8 | 0.0092838 |
| 1418151_at   | myotubularin related protein 4                                                               | Mtmr4         | 170749 | 1.8 | 0.0010927 |
| 1418074_at   | ST6 (alpha-N-acetyl-neuraminyl-2,3-beta-galactosyl-1,3)-N-acetylgalactosaminyl transferase 4 | St6galnac4    | 20448  | 1.8 | 0.0016779 |
| 1418906_at   | nucleotide binding protein 1                                                                 | Nubp1         | 26425  | 1.8 | 0.0066953 |
| 1450368_a_at | protein phosphatase 3, regulatory subunit B, alpha isoform ( <i>calcineurin</i> )            | Ppp3r1        | 19058  | 1.8 | 0.012986  |
| 1450235_at   | FYVE, RhoGEF and PH domain containing 3                                                      | Fgd3          | 30938  | 1.8 | 0.0032187 |
| 1453077_a_at | small nuclear RNA activating complex, polypeptide 3                                          | Snopc3        | 77634  | 1.8 | 0.0048628 |
| 1455043_at   | transportin 1                                                                                | Tnpo1         | 238799 | 1.8 | 0.0009197 |
| 1437238_x_at | NMD3 homolog ( <i>S. cerevisiae</i> )                                                        | Nmd3          | 97112  | 1.8 | 8.18E-05  |
| 1452244_at   | RIKEN cDNA 6330406I15 gene                                                                   | 6330406I15Rik | 70717  | 1.8 | 0.0038954 |
| 1418714_at   | dual specificity phosphatase 8                                                               | Dusp8         | 18218  | 1.8 | 0.0059941 |
| 1425820_x_at | G patch domain containing 4                                                                  | Gpatch4       | 66614  | 1.8 | 0.0038691 |

|              |                                                                           |               |        |     |           |
|--------------|---------------------------------------------------------------------------|---------------|--------|-----|-----------|
| 1426737_at   | G1 to S phase transition 1                                                | Gspt1         | 14852  | 1.8 | 0.0021515 |
| 1426370_at   | fatty acyl CoA reductase 1                                                | Far1          | 67420  | 1.8 | 0.007587  |
| 1452662_a_at | eukaryotic translation initiation factor 2, subunit 1 alpha               | Eif2s1        | 13665  | 1.8 | 0.0004309 |
| 1458218_s_at | phosphodiesterase 7A                                                      | Pde7a         | 18583  | 1.8 | 0.00693   |
| 1435709_at   | signal sequence receptor, delta                                           | Ssr4          | 20832  | 1.8 | 0.0016904 |
| 1448769_at   | solute carrier family 35, member B1                                       | Slc35b1       | 110172 | 1.8 | 0.0008765 |
| 1446550_at   | G1 to S phase transition 1                                                | Gspt1         | 14852  | 1.8 | 0.0069645 |
| 1416559_at   | ribosomal RNA processing 8, methyltransferase, homolog (yeast)            | Rrp8          | 101867 | 1.8 | 9.946E-05 |
| 1423979_a_at | solute carrier family 25 (mitochondrial carrier, palmitoylcarnitine trans | Slc25a29      | 214663 | 1.8 | 0.0058256 |
| 1452830_s_at | carbamoyl-phosphate synthetase 2, aspartate transcarbamylase, and         | Cad           | 69719  | 1.8 | 0.0001161 |
| 1426705_s_at | isoleucine-tRNA synthetase                                                | Iars          | 105148 | 1.8 | 0.0026094 |
| 1419382_a_at | dehydrogenase/reductase (SDR family) member 4                             | Dhrs4         | 28200  | 1.8 | 0.0034173 |
| 1436196_at   | hypothetical protein C030046G05                                           | C030046G05    | 327885 | 1.8 | 0.001365  |
| 1443794_x_at | nucleolar complex associated 4 homolog ( <i>S. cerevisiae</i> )           | Noc4l         | 100608 | 1.8 | 0.002974  |
| 1425059_at   | protein arginine N-methyltransferase 6                                    | Prmt6         | 99890  | 1.8 | 0.0038414 |
| 1418527_a_at | FUS interacting protein (serine-arginine rich) 1                          | Fusip1        | 14105  | 1.8 | 0.0083765 |
| 1425293_a_at | zinc finger, CCHC domain containing 18                                    | Zcchc18       | 66995  | 1.8 | 0.0031769 |
| 1421657_a_at | SRY-box containing gene 17                                                | Sox17         | 20671  | 1.8 | 0.0030524 |
| 1421912_at   | solute carrier family 23 (nucleobase transporters), member 1              | Slc23a1       | 20522  | 1.8 | 0.0455472 |
| 1422769_at   | synaptotagmin binding, cytoplasmic RNA interacting protein                | Syncrip       | 56403  | 1.8 | 0.0059148 |
| 1458836_at   | calbindin 1                                                               | Calb1         | 12307  | 1.8 | 0.0218914 |
| 1423264_at   | block of proliferation 1                                                  | Bop1          | 12181  | 1.8 | 5.683E-05 |
| 1416606_s_at | NHP2 ribonucleoprotein homolog (yeast)                                    | Nhp2          | 52530  | 1.8 | 0.0001642 |
| 1426600_at   | solute carrier family 2 (facilitated glucose transporter), member 1       | Slc2a1        | 20525  | 1.8 | 0.000755  |
| 1437606_at   | RIKEN cDNA 9530048O09 gene                                                | 9530048O09Rik | 78611  | 1.8 | 0.0020151 |
| 1418847_at   | arginase type II                                                          | Arg2          | 11847  | 1.8 | 0.0039849 |
| 1452829_at   | carbamoyl-phosphate synthetase 2, aspartate transcarbamylase, and         | Cad           | 69719  | 1.7 | 0.000449  |
| 1423934_at   | RIKEN cDNA 1600029D21 gene                                                | 1600029D21Rik | 76509  | 1.7 | 0.00421   |
| 1460209_at   | ubiquitin specific peptidase 39                                           | Usp39         | 28035  | 1.7 | 0.0001984 |
| 1452037_at   | mannoside acetylglucosaminyltransferase 2                                 | Mgat2         | 217664 | 1.7 | 0.0027956 |
| 1449140_at   | NudC domain containing 2                                                  | Nudcd2        | 52653  | 1.7 | 0.001182  |
| 1450908_at   | eukaryotic translation initiation factor 4E                               | Eif4e         | 13684  | 1.7 | 0.0006246 |
| 1452753_at   | forkhead box K2                                                           | Foxk2         | 68837  | 1.7 | 0.0008396 |
| 1424511_at   | aurora kinase A                                                           | Aurka         | 20878  | 1.7 | 0.0083711 |
| 1450860_at   | leucine aminopeptidase 3                                                  | Lap3          | 66988  | 1.7 | 0.0057848 |
| 1452647_a_at | DPH2 homolog ( <i>S. cerevisiae</i> )                                     | Dph2          | 67728  | 1.7 | 0.0009129 |
| 1453851_a_at | growth arrest and DNA-damage-inducible 45 gamma                           | Gadd45g       | 23882  | 1.7 | 0.0059417 |

|              |                                                                         |               |           |     |           |
|--------------|-------------------------------------------------------------------------|---------------|-----------|-----|-----------|
| 1459546_s_at | ectonucleotide pyrophosphatase/phosphodiesterase 1                      | Enpp1         | 18605     | 1.7 | 0.0001567 |
| 1454992_at   | solute carrier family 7 (cationic amino acid transporter, y+ system), m | Slc7a1        | 11987     | 1.7 | 0.0002127 |
| 1423667_at   | methionine adenosyltransferase II, alpha                                | Mat2a         | 232087    | 1.7 | 0.0009448 |
| 1436508_at   | malectin                                                                | Mlec          | 109154    | 1.7 | 0.015373  |
| 1450423_s_at | brix domain containing 1                                                | Bxdc1         | 67239     | 1.7 | 0.0002287 |
| 1416248_at   | NAD kinase                                                              | Nadk          | 192185    | 1.7 | 2.135E-05 |
| 1428788_at   | phosphoglycolate phosphatase                                            | Pgp           | 67078     | 1.7 | 0.0023054 |
| 1424019_at   | NOP2 nucleolar protein homolog (yeast)                                  | Nop2          | 110109    | 1.7 | 4.712E-05 |
| 1450005_x_at | delta-like 2 homolog (Drosophila)                                       | DLk2          | 106565    | 1.7 | 0.0097105 |
| 1460673_at   | folypolyglutamyl synthetase                                             | Fpgs          | 14287     | 1.7 | 0.002217  |
| 1416208_at   | ubiquitin specific peptidase 14                                         | Usp14         | 59025     | 1.7 | 0.0021208 |
| 1423703_at   | peter pan homolog (Drosophila)                                          | Ppan          | 235036    | 1.7 | 0.0035085 |
| 1416502_a_at | prolactin regulatory element binding                                    | Preb          | 50907     | 1.7 | 0.0004497 |
| 1429568_x_at | ubiquitin-conjugating enzyme E2F (putative)                             | Ube2f         | 67921     | 1.7 | 0.0023677 |
| 1425860_x_at | chemokine-like factor                                                   | Cklf          | 75458     | 1.7 | 0.0018261 |
| 1418226_at   | origin recognition complex, subunit 2-like (S. cerevisiae)              | Orc2l         | 18393     | 1.7 | 0.0052714 |
| 1425769_x_at | chemokine-like factor                                                   | Cklf          | 75458     | 1.7 | 0.0078595 |
| 1426599_a_at | solute carrier family 2 (facilitated glucose transporter), member 1     | Slc2a1        | 20525     | 1.7 | 0.0003625 |
| 1453257_at   | 1-acylglycerol-3-phosphate O-acyltransferase 5 (lysophosphatidic aci    | Agpat5        | 52123     | 1.7 | 0.0003628 |
| 1424457_at   | amyloid beta (A4) precursor protein-binding, family B, member 3         | Apbb3         | 225372    | 1.7 | 0.0038145 |
| 1416146_at   | heat shock protein 4                                                    | Hspa4         | 15525     | 1.7 | 0.0003558 |
| 1424268_at   | spermine oxidase                                                        | Smox          | 228608    | 1.7 | 0.0013653 |
| 1450122_at   | protein tyrosine phosphatase, receptor type, G                          | Ptprg         | 19270     | 1.7 | 0.0066817 |
| 1423156_at   | glucosamine-phosphate N-acetyltransferase 1                             | Gnpat1        | 54342     | 1.7 | 0.0011287 |
| 1428754_at   | tRNA methyltransferase 6 homolog (S. cerevisiae)                        | Trmt6         | 66926     | 1.7 | 0.0039169 |
| 1427878_at   | RIKEN cDNA 0610010O12 gene                                              | 0610010O12Rik | 66060     | 1.7 | 0.006904  |
| 1456738_s_at | brain protein 16                                                        | Brp16         | 59053     | 1.7 | 0.0008582 |
| 1448119_at   | 2,3-bisphosphoglycerate mutase                                          | Bpgm          | 12183     | 1.7 | 0.0054829 |
| 1438095_x_at | Nucleolar complex associated 4 homolog (S. cerevisiae) (Noc4l), mR      | Noc4l         | 100608    | 1.7 | 1.062E-06 |
| 1450986_at   | NOP58 ribonucleoprotein homolog (yeast)                                 | Nop58         | 55989     | 1.7 | 0.0006498 |
| 1454909_at   | transforming, acidic coiled-coil containing protein 1                   | Tacc1         | 320165    | 1.7 | 0.0001625 |
| 1419385_a_at | ubiquilin 1                                                             | Ubqln1        | 56085     | 1.7 | 0.0010259 |
| 1419163_s_at | DnaJ (Hsp40) homolog, subfamily C, member 3                             | Dnajc3        | 100037258 | 1.7 | 0.0007953 |
| 1425930_a_at | MAX-like protein X                                                      | Mlx           | 21428     | 1.7 | 0.0039933 |
| 1419690_at   | RIKEN cDNA 2610002M06 gene                                              | 2610002M06Rik | 67028     | 1.7 | 0.0003608 |
| 1423362_at   | sortilin 1                                                              | Sort1         | 20661     | 1.7 | 0.0013209 |
| 1436796_at   | matrin 3                                                                | Matr3         | 17184     | 1.7 | 0.0102823 |

|              |                                                                         |          |        |     |           |
|--------------|-------------------------------------------------------------------------|----------|--------|-----|-----------|
| 1441630_at   | E1A binding protein p400, mRNA (cDNA clone IMAGE:5116582)               | Ep400    | 75560  | 1.7 | 0.0199951 |
| 1453840_at   | poly(A) binding protein, cytoplasmic 1                                  | Pabpc1   | 18458  | 1.7 | 0.0126974 |
| 1425704_at   | dehydrogenase/reductase (SDR family) member 11                          | Dhrs11   | 192970 | 1.7 | 0.0071177 |
| 1460713_at   | cDNA sequence BC048355                                                  | BC048355 | 381101 | 1.7 | 0.0046239 |
| 1438386_x_at | methionine adenosyltransferase II, alpha                                | Mat2a    | 232087 | 1.7 | 0.0003259 |
| 1417014_at   | heat shock protein 8                                                    | Hspb8    | 80888  | 1.7 | 0.0046558 |
| 1459880_at   | Alanine-glyoxylate aminotransferase 2-like 2, mRNA (cDNA clone M        | Agxt2l2  | 72947  | 1.7 | 0.0005756 |
| 1450446_a_at | suppressor of cytokine signaling 1                                      | Socs1    | 12703  | 1.7 | 0.0017132 |
| 1416376_at   | transmembrane protein 97                                                | Tmem97   | 69071  | 1.7 | 0.0003392 |
| 1420414_at   | homeo box A11                                                           | Hoxa11   | 15396  | 1.7 | 0.0008928 |
| 1451559_a_at | dehydrogenase/reductase (SDR family) member 4                           | Dhrs4    | 28200  | 1.7 | 0.0001864 |
| 1417774_at   | N-acetylneuraminic acid synthase (sialic acid synthase)                 | Nans     | 94181  | 1.7 | 0.0008867 |
| 1417584_at   | solute carrier family 11 (proton-coupled divalent metal ion transporter | Slc11a2  | 18174  | 1.7 | 0.0006866 |
| 1424425_a_at | methylthioadenosine phosphorylase                                       | Mtap     | 66902  | 1.7 | 0.0007287 |
| 1422709_a_at | WD repeat domain 46                                                     | Wdr46    | 57315  | 1.7 | 0.0014455 |
| 1420909_at   | vascular endothelial growth factor A                                    | Vegfa    | 22339  | 1.7 | 0.0351455 |
| 1457726_at   | ribosomal protein S15A                                                  | Rps15a   | 267019 | 1.7 | 0.0009109 |
| 1437642_at   | ArfGAP with FG repeats 2                                                | Agfg2    | 231801 | 1.7 | 0.0037543 |
| 1448681_at   | interleukin 15 receptor, alpha chain                                    | Il15ra   | 16169  | 1.7 | 0.0051773 |
| 1448593_at   | WNT1 inducible signaling pathway protein 1                              | Wisp1    | 22402  | 1.7 | 0.0025113 |
| 1417200_at   | transmembrane protein 183A                                              | Tmem183a | 57439  | 1.7 | 0.0021372 |
| 1448742_at   | snail homolog 1 (Drosophila)                                            | Snai1    | 20613  | 1.7 | 0.0029595 |
| 1430388_a_at | sulfatase 2                                                             | Sulf2    | 72043  | 1.7 | 0.0033367 |
| 1415864_at   | 2,3-bisphosphoglycerate mutase                                          | Bpgm     | 12183  | 1.7 | 0.0066809 |
| 1428902_at   | carbohydrate sulfotransferase 11                                        | Chst11   | 58250  | 1.7 | 7.204E-05 |
| 1416241_at   | SEC13 homolog (S. cerevisiae)                                           | Sec13    | 110379 | 1.7 | 0.0018673 |
| 1426886_at   | ceroid-lipofuscinosis, neuronal 5                                       | Cln5     | 211286 | 1.7 | 0.0009077 |
| 1421945_a_at | brix domain containing 1                                                | Bxdc1    | 67239  | 1.7 | 0.0025199 |
| 1451262_a_at | JTV1 gene                                                               | Jtv1     | 231872 | 1.7 | 0.0005299 |
| 1418869_a_at | pseudouridine synthase 1                                                | Pus1     | 56361  | 1.7 | 0.0002766 |
| 1416275_at   | solute carrier family 26, member 6                                      | Slc26a6  | 171429 | 1.7 | 0.0102832 |
| 1460358_s_at | nudix (nucleoside diphosphate linked moiety X)-type motif 22            | Nudt22   | 68323  | 1.7 | 0.0007747 |
| 1460556_at   | microtubule associated monooxygenase, calponin and LIM domain co        | Micall1  | 27008  | 1.7 | 0.0081987 |
| 1460638_at   | tyrosyl-tRNA synthetase                                                 | Yars     | 107271 | 1.7 | 0.0002569 |
| 1448867_at   | TMEM9 domain family, member B                                           | Tmem9b   | 56786  | 1.7 | 0.0004939 |
| 1436509_at   | malectin                                                                | Mlec     | 109154 | 1.7 | 0.0006958 |
| 1419522_at   | zinc finger, MYND domain containing 19                                  | Zmynd19  | 67187  | 1.7 | 0.0040391 |

|              |                                                                         |               |        |     |           |
|--------------|-------------------------------------------------------------------------|---------------|--------|-----|-----------|
| 1438992_x_at | activating transcription factor 4                                       | Atf4          | 11911  | 1.7 | 3.163E-05 |
| 1446165_at   | predicted gene, EG621312                                                | EG621312      | 621312 | 1.7 | 0.0083441 |
| 1417439_at   | CD248 antigen, endosialin                                               | Cd248         | 70445  | 1.7 | 0.0090625 |
| 1426946_at   | importin 5                                                              | Ipo5          | 70572  | 1.7 | 0.0001379 |
| 1425503_at   | glucosaminyl (N-acetyl) transferase 2, I-branching enzyme               | Gcnt2         | 14538  | 1.7 | 0.0011116 |
| 1415827_a_at | stress-associated endoplasmic reticulum protein 1                       | Serp1         | 28146  | 1.7 | 0.0003806 |
| 1419263_a_at | adhesion regulating molecule 1                                          | Adrm1         | 56436  | 1.7 | 0.0002636 |
| 1426351_at   | heat shock protein 1 (chaperonin)                                       | Hspd1         | 15510  | 1.7 | 0.0003243 |
| 1423863_at   | ATP-binding cassette, sub-family F (GCN20), member 2                    | Abcf2         | 27407  | 1.7 | 0.000452  |
| 1447484_x_at | RIKEN cDNA 2610002F03 gene, mRNA (cDNA clone IMAGE:53244)               | Snhg7         | 72091  | 1.7 | 0.0446049 |
| 1419209_at   | chemokine (C-X-C motif) ligand 1                                        | Cxcl1         | 14825  | 1.7 | 0.00238   |
| 1429119_at   | isoamyl acetate-hydrolyzing esterase 1 homolog ( <i>S. cerevisiae</i> ) | Iah1          | 67732  | 1.7 | 0.0001104 |
| 1419652_s_at | Na <sup>+</sup> /K <sup>+</sup> transporting ATPase interacting 1       | Nkain1        | 67149  | 1.7 | 0.0088812 |
| 1460732_a_at | periplakin                                                              | Ppl           | 19041  | 1.7 | 0.0062541 |
| 1424415_s_at | spondin 1, (f-spondin) extracellular matrix protein                     | Spon1         | 233744 | 1.7 | 0.000816  |
| 1427035_at   | solute carrier family 39 (zinc transporter), member 14                  | Slc39a14      | 213053 | 1.7 | 0.0001149 |
| 1423884_at   | cirrhosis, autosomal recessive 1A (human)                               | Cirh1a        | 21771  | 1.7 | 0.0006737 |
| 1418905_at   | nucleotide binding protein 1                                            | Nubp1         | 26425  | 1.7 | 0.0095357 |
| 1451164_a_at | mitochondrial ribosomal protein S18B                                    | Mrps18b       | 66973  | 1.7 | 0.0001788 |
| 1435544_at   | exosome component 6                                                     | Exosc6        | 72544  | 1.6 | 0.0017347 |
| 1421089_a_at | RIKEN cDNA 2610028A01 gene                                              | 2610028A01Rik | 72400  | 1.6 | 0.0011426 |
| 1418052_at   | mevalonate kinase                                                       | Mvk           | 17855  | 1.6 | 0.0077174 |
| 1416106_at   | KTI12 homolog, chromatin associated ( <i>S. cerevisiae</i> )            | Kti12         | 100087 | 1.6 | 0.0002291 |
| 1448484_at   | S-adenosylmethionine decarboxylase 1                                    | Amd1          | 11702  | 1.6 | 3.93E-05  |
| 1417004_at   | tumor susceptibility gene 101                                           | Tsg101        | 22088  | 1.6 | 0.0001153 |
| 1436305_at   | ring finger protein 217                                                 | Rnf217        | 268291 | 1.6 | 0.0003946 |
| 1449118_at   | dihydrolipoamide branched chain transacylase E2                         | Dbt           | 13171  | 1.6 | 0.0077253 |
| 1425350_a_at | myelin basic protein expression factor 2, repressor                     | Myef2         | 17876  | 1.6 | 0.0060268 |
| 1433907_at   | Pbx/knotted 1 homeobox 2                                                | Pknox2        | 208076 | 1.6 | 5.568E-05 |
| 1417304_at   | chordin                                                                 | Chrd          | 12667  | 1.6 | 0.0104972 |
| 1423992_at   | GATA zinc finger domain containing 2A                                   | Gatad2a       | 234366 | 1.6 | 9.569E-05 |
| 1452095_a_at | histocompatibility 47                                                   | H47           | 109815 | 1.6 | 0.0117377 |
| 1455505_at   | GATA zinc finger domain containing 2A                                   | Gatad2a       | 234366 | 1.6 | 0.0004087 |
| 1460460_a_at | golgi reassembly stacking protein 2                                     | Gorasp2       | 70231  | 1.6 | 0.0011888 |
| 1415910_s_at | cytokine induced apoptosis inhibitor 1                                  | Ciapin1       | 109006 | 1.6 | 0.0009451 |
| 1437211_x_at | ELOVL family member 5, elongation of long chain fatty acids (yeast)     | Elovl5        | 68801  | 1.6 | 0.0002678 |
| 1434524_at   | eukaryotic translation initiation factor 2B, subunit 3                  | Eif2b3        | 108067 | 1.6 | 0.0015739 |

|              |                                                                     |               |           |     |           |
|--------------|---------------------------------------------------------------------|---------------|-----------|-----|-----------|
| 1450745_at   | core 1 synthase, glycoprotein-N-acetylgalactosamine 3-beta-galactos | C1galt1       | 94192     | 1.6 | 0.0014528 |
| 1416015_s_at | ATP-binding cassette, sub-family E (OABP), member 1                 | Abce1         | 24015     | 1.6 | 0.0005569 |
| 1415840_at   | ELOVL family member 5, elongation of long chain fatty acids (yeast) | Elov15        | 68801     | 1.6 | 0.0006468 |
| 1443909_at   | cleavage stimulation factor, 3' pre-RNA, subunit 3                  | Cstf3         | 228410    | 1.6 | 0.0074132 |
| 1459874_s_at | myotubularin related protein 4                                      | Mtmr4         | 170749    | 1.6 | 0.0008757 |
| 1460035_at   | prohibitin 2                                                        | Phb2          | 12034     | 1.6 | 0.0326634 |
| 1424731_at   | notchless homolog 1 (Drosophila)                                    | Nle1          | 217011    | 1.6 | 6.35E-05  |
| 1440383_at   | DNA cross-link repair 1B, PSO2 homolog (S. cerevisiae)              | Dclre1b       | 140917    | 1.6 | 5.481E-05 |
| 1417192_at   | translocase of outer mitochondrial membrane 70 homolog A (yeast)    | Tomm70a       | 28185     | 1.6 | 0.003324  |
| 1428261_at   | coiled-coil domain containing 134                                   | Ccdc134       | 76457     | 1.6 | 0.000242  |
| 1416746_at   | H2A histone family, member X                                        | H2afx         | 15270     | 1.6 | 0.001597  |
| 1448133_at   | NMD3 homolog (S. cerevisiae)                                        | Nmd3          | 97112     | 1.6 | 0.0006823 |
| 1439010_at   | La ribonucleoprotein domain family, member 4                        | Larp4         | 207214    | 1.6 | 0.0003195 |
| 1417091_at   | conserved helix-loop-helix ubiquitous kinase                        | Chuk          | 12675     | 1.6 | 0.0014596 |
| 1450943_at   | mago-nashi homolog B (Drosophila)                                   | Magohb        | 66441     | 1.6 | 0.0002171 |
| 1424151_at   | JTV1 gene                                                           | Jtv1          | 231872    | 1.6 | 0.000356  |
| 1447483_s_at | RIKEN cDNA 2610002F03 gene, mRNA (cDNA clone IMAGE:53244)           | Snhg7         | 72091     | 1.6 | 0.0021862 |
| 1420056_s_at | jumonji domain containing 6                                         | Jmjd6         | 107817    | 1.6 | 0.0048347 |
| 1448707_at   | TAF13 RNA polymerase II, TATA box binding protein (TBP)-associat    | Taf13         | 99730     | 1.6 | 0.0014257 |
| 1428477_at   | elaC homolog 2 (E. coli)                                            | Elac2         | 68626     | 1.6 | 0.0004152 |
| 1416093_a_at | mitochondrial ribosomal protein L20                                 | Mrpl20        | 66448     | 1.6 | 0.0026919 |
| 1429207_at   | RIKEN cDNA 5730408K05 gene                                          | 5730408K05Rik | 67531     | 1.6 | 0.007961  |
| 1430326_s_at | ubiquinol-cytochrome c reductase, complex III subunit VII           | Uqcrcq        | 22272     | 1.6 | 0.0040826 |
| 1448236_at   | radixin                                                             | Rdx           | 19684     | 1.6 | 3.269E-06 |
| 1422844_a_at | WD repeat domain 77                                                 | Wdr77         | 70465     | 1.6 | 9.311E-05 |
| 1451208_at   | eukaryotic translation termination factor 1                         | Etf1          | 225363    | 1.6 | 0.0086362 |
| 1440179_x_at | ring finger protein 217                                             | Rnf217        | 268291    | 1.6 | 0.0019767 |
| 1428389_s_at | WD repeat domain 43                                                 | Wdr43         | 72515     | 1.6 | 0.0014225 |
| 1415914_at   | heterogeneous nuclear ribonucleoprotein A/B                         | Hnrnpab       | 15384     | 1.6 | 0.0006477 |
| 1421155_at   | UDP-Gal:betaGal beta 1,3-galactosyltransferase, polypeptide 6       | B3galt6       | 117592    | 1.6 | 0.0036999 |
| 1453359_at   | exosome component 1                                                 | Exosc1        | 66583     | 1.6 | 0.0047926 |
| 1428210_s_at | conserved helix-loop-helix ubiquitous kinase                        | Chuk          | 12675     | 1.6 | 0.0010134 |
| 1428666_at   | asparaginyl-tRNA synthetase                                         | Nars          | 70223     | 1.6 | 0.0002426 |
| 1434940_x_at | regulator of G-protein signaling 19                                 | Rgs19         | 56470     | 1.6 | 0.002629  |
| 1434414_at   | FAD-dependent oxidoreductase domain containing 2                    | Foxred2       | 239554    | 1.6 | 0.0012668 |
| 1449372_at   | DnaJ (Hsp40) homolog, subfamily C, member 3                         | Dnajc3        | 100037258 | 1.6 | 0.0001293 |
| 1417096_at   | ribosomal RNA processing 15 homolog (S. cerevisiae)                 | Rrp15         | 67223     | 1.6 | 0.0015047 |



|              |                                                                                     |               |           |     |           |
|--------------|-------------------------------------------------------------------------------------|---------------|-----------|-----|-----------|
| 1434216_a_at | nudix (nucleoside diphosphate linked moiety X)-type motif 19                        | Nudt19        | 110959    | 1.6 | 0.0001099 |
| 1418963_at   | RIKEN cDNA 2310047O13 gene                                                          | 2310047O13Rik | 66960     | 1.6 | 0.0019013 |
| 1427058_at   | eukaryotic translation initiation factor 4A1                                        | Eif4a1        | 13681     | 1.6 | 0.0029062 |
| 1434200_at   | cDNA sequence BC010981                                                              | BC010981      | 407830    | 1.6 | 0.0017488 |
| 1435061_at   | nudix (nucleoside diphosphate linked moiety X)-type motif 10                        | Nudt10        | 102954    | 1.6 | 0.0022921 |
| 1450757_at   | cadherin 11                                                                         | Cdh11         | 12552     | 1.6 | 0.0061626 |
| 1417829_a_at | RAB15, member RAS oncogene family                                                   | Rab15         | 104886    | 1.6 | 0.0008603 |
| 1448740_at   | RAN guanine nucleotide release factor                                               | Rangrf        | 57785     | 1.6 | 0.0021796 |
| 1448274_at   | complement component 1, q subcomponent binding protein                              | C1qbp         | 12261     | 1.6 | 6.504E-05 |
| 1421821_at   | low density lipoprotein receptor                                                    | Ldlr          | 16835     | 1.6 | 6.915E-05 |
| 1444108_at   | DnaJ (Hsp40) homolog, subfamily C, member 25                                        | Dnajc25       | 72429     | 1.6 | 0.0077706 |
| 1416431_at   | tubulin, beta 6                                                                     | Tubb6         | 67951     | 1.6 | 4.054E-06 |
| 1439740_s_at | uridine-cytidine kinase 2                                                           | Uck2          | 80914     | 1.6 | 0.0002281 |
| 1432181_s_at | SCO cytochrome oxidase deficient homolog 2 (yeast)                                  | Sco2          | 100126824 | 1.6 | 0.0011736 |
| 1434424_at   | major facilitator superfamily domain containing 7B                                  | Mfsd7b        | 226844    | 1.6 | 0.0009545 |
| 1452272_a_at | growth factor, erv1 ( <i>S. cerevisiae</i> )-like (augmenter of liver regeneration) | Gfer          | 11692     | 1.6 | 0.0086591 |
| 1448473_at   | budding uninhibited by benzimidazoles 3 homolog ( <i>S. cerevisiae</i> )            | Bub3          | 12237     | 1.6 | 0.0019931 |
| 1451374_x_at | chemokine-like factor                                                               | Cklf          | 75458     | 1.6 | 0.0058447 |
| 1452318_a_at | heat shock protein 1B                                                               | Hspa1b        | 15511     | 1.6 | 0.0057179 |
| 1425668_a_at | ST3 beta-galactoside alpha-2,3-sialyltransferase 4                                  | St3gal4       | 20443     | 1.6 | 0.0063581 |
| 1428800_a_at | pseudouridylate synthase 7 homolog ( <i>S. cerevisiae</i> )-like                    | Pus7l         | 78895     | 1.6 | 0.0011574 |
| 1440338_at   | RIKEN cDNA E430028B21 gene                                                          | E430028B21Rik | 211948    | 1.6 | 0.0052406 |
| 1428816_a_at | GATA binding protein 2                                                              | Gata2         | 14461     | 1.6 | 0.0002052 |
| 1455821_x_at | complement component 1, q subcomponent binding protein                              | C1qbp         | 12261     | 1.6 | 1.002E-05 |
| 1454109_a_at | jumonji domain containing 6                                                         | Jmjd6         | 107817    | 1.6 | 0.0018608 |
| 1460260_s_at | karyopherin (importin) alpha 1                                                      | Kpna1         | 16646     | 1.6 | 0.0017376 |
| 1442484_at   | DNA segment, Chr 9, ERATO Doi 306, expressed                                        | D9Erd306e     | 52203     | 1.6 | 0.0243025 |
| 1448908_at   | phosphatidic acid phosphatase type 2B                                               | Ppap2b        | 67916     | 1.6 | 0.0002884 |
| 1450333_a_at | GATA binding protein 2                                                              | Gata2         | 14461     | 1.6 | 0.0001201 |
| 1449505_at   | karyopherin (importin) alpha 1                                                      | Kpna1         | 16646     | 1.6 | 0.000274  |
| 1438886_at   | hairy/enhancer-of-split related with YRPW motif-like                                | Heyl          | 56198     | 1.6 | 0.0059864 |
| 1423241_a_at | transcription factor Dp 1                                                           | Tfdp1         | 21781     | 1.6 | 0.000409  |
| 1435333_at   | NADH dehydrogenase (ubiquinone) 1 alpha subcomplex, assembly factor                 | Ndufaf4       | 68493     | 1.6 | 0.0064713 |
| 1422547_at   | RAN binding protein 1                                                               | Ranbp1        | 19385     | 1.6 | 0.0056618 |
| 1424013_at   | eukaryotic translation termination factor 1                                         | Etf1          | 225363    | 1.6 | 0.0018454 |
| 1451265_at   | coiled-coil domain containing 115                                                   | Ccdc115       | 69668     | 1.6 | 0.0049588 |
| 1417173_at   | activating transcription factor 6 beta                                              | Atf6b         | 12915     | 1.6 | 0.0001477 |

|              |                                                                            |               |           |     |           |
|--------------|----------------------------------------------------------------------------|---------------|-----------|-----|-----------|
| 1418467_at   | SWI/SNF related, matrix associated, actin dependent regulator of chromatin | Smarcd3       | 66993     | 1.6 | 0.0028211 |
| 1453202_at   | RIKEN cDNA E330016A19 gene                                                 | E330016A19Rik | 214763    | 1.6 | 0.0003763 |
| 1429126_at   | RIKEN cDNA 2600001M11 gene                                                 | 2600001M11Rik | 76531     | 1.6 | 0.0091173 |
| 1448533_at   | tubulin folding cofactor B                                                 | Tbcb          | 66411     | 1.6 | 9.893E-05 |
| 1434985_a_at | eukaryotic translation initiation factor 4A1                               | Eif4a1        | 13681     | 1.6 | 0.0004312 |
| 1416035_at   | hypoxia inducible factor 1, alpha subunit                                  | Hif1a         | 15251     | 1.6 | 1.977E-05 |
| 1427126_at   | heat shock protein 1B                                                      | Hspa1b        | 15511     | 1.6 | 0.0054988 |
| 1451782_a_at | solute carrier family 29 (nucleoside transporters), member 1               | Slc29a1       | 63959     | 1.6 | 0.006235  |
| 1434398_at   | NF-kappaB repressing factor                                                | Nkrf          | 77286     | 1.6 | 0.0001906 |
| 1452831_s_at | phosphoribosyl pyrophosphate amidotransferase                              | Ppat          | 231327    | 1.6 | 0.0001521 |
| 1425780_a_at | transmembrane protein 167                                                  | Tmem167       | 66074     | 1.6 | 0.0065103 |
| 1428106_at   | RIKEN cDNA 1300001I01 gene                                                 | 1300001I01Rik | 74148     | 1.6 | 0.0001544 |
| 1450264_a_at | choline kinase alpha                                                       | Chka          | 12660     | 1.6 | 2.739E-05 |
| 1426350_at   | mannoside acetylglucosaminyltransferase 2                                  | Mgat2         | 217664    | 1.6 | 0.0070692 |
| 1437660_at   | natural killer tumor recognition sequence                                  | Nktr          | 18087     | 1.6 | 0.0360506 |
| 1449645_s_at | chaperonin containing Tcp1, subunit 3 (gamma)                              | Cct3          | 12462     | 1.6 | 0.0087793 |
| 1452394_at   | cysteinyI-tRNA synthetase                                                  | Cars          | 27267     | 1.6 | 0.0029662 |
| 1451509_at   | TAF9 RNA polymerase II, TATA box binding protein (TBP)-associated factor 9 | Taf9          | 108143    | 1.6 | 0.0011953 |
| 1417786_a_at | regulator of G-protein signaling 19                                        | Rgs19         | 56470     | 1.6 | 0.0033116 |
| 1428334_at   | osteopetrosis associated transmembrane protein 1                           | Ostm1         | 14628     | 1.6 | 0.0015865 |
| 1433591_at   | protein phosphatase 3, regulatory subunit B, alpha isoform (calcineurin)   | Ppp3r1        | 19058     | 1.6 | 2.35E-05  |
| 1433887_at   | DnaJ (Hsp40) homolog, subfamily C, member 3                                | Dnajc3        | 100037258 | 1.6 | 6.976E-05 |
| 1440230_at   | tsukushin                                                                  | Tsku          | 244152    | 1.6 | 0.000974  |
| 1451383_a_at | conserved helix-loop-helix ubiquitous kinase                               | Chuk          | 12675     | 1.6 | 0.0231117 |
| 1420826_at   | leucine zipper-EF-hand containing transmembrane protein 1                  | Letm1         | 56384     | 1.6 | 0.0010477 |
| 1434295_at   | RAS guanyl releasing protein 1                                             | Rasgrp1       | 19419     | 1.6 | 0.0342854 |
| 1415909_at   | stress-induced phosphoprotein 1                                            | Stip1         | 20867     | 1.6 | 0.0005457 |
| 1419766_at   | salt inducible kinase 1                                                    | Sik1          | 17691     | 1.6 | 0.0337938 |
| 1433934_at   | Sec24 related gene family, member A (S. cerevisiae)                        | Sec24a        | 77371     | 1.6 | 0.0003034 |
| 1448782_at   | thioredoxin domain containing 11                                           | Txndc11       | 106200    | 1.6 | 0.0026817 |
| 1427229_at   | 3-hydroxy-3-methylglutaryl-Coenzyme A reductase                            | Hmgcr         | 15357     | 1.6 | 0.0015775 |
| 1416684_at   | fibrillarin                                                                | Fbl           | 14113     | 1.6 | 0.0001125 |
| 1456212_x_at | suppressor of cytokine signaling 3                                         | Socs3         | 12702     | 1.6 | 0.0011043 |
| 1416185_a_at | alcohol dehydrogenase 5 (class III), chi polypeptide                       | Adh5          | 11532     | 1.6 | 0.0003315 |
| 1417587_at   | timeless homolog (Drosophila)                                              | Timeless      | 21853     | 1.6 | 0.0099854 |
| 1449750_at   | expressed sequence AA407331                                                | AA407331      | 106839    | 1.6 | 0.024539  |
| 1418255_s_at | serum response factor                                                      | Srf           | 20807     | 1.6 | 0.0015367 |

|              |                                                                          |               |             |     |           |
|--------------|--------------------------------------------------------------------------|---------------|-------------|-----|-----------|
| 1429080_at   | M-phase phosphoprotein 10 (U3 small nucleolar ribonucleoprotein)         | Mphosph10     | 67973       | 1.6 | 0.0039496 |
| 1417013_at   | heat shock protein 8                                                     | Hspb8         | 80888       | 1.6 | 0.001143  |
| 1423826_at   | nucleolar complex associated 4 homolog ( <i>S. cerevisiae</i> )          | Noc4l         | 100608      | 1.6 | 0.0003962 |
| 1450845_a_at | basic leucine zipper and W2 domains 1                                    | Bzw1          | 66882       | 1.6 | 0.0048325 |
| 1442944_at   | expressed sequence C76555                                                | C76555        | 97125       | 1.6 | 0.0422213 |
| 1433464_at   | importin 13                                                              | Ipo13         | 230673      | 1.6 | 0.0025605 |
| 1454709_at   | transmembrane protein 64                                                 | Tmem64        | 100201      | 1.6 | 0.0003103 |
| 1429251_at   | PR domain containing 2, with ZNF domain                                  | Prdm2         | 110593      | 1.6 | 0.0055762 |
| 1427196_at   | WNK lysine deficient protein kinase 4                                    | Wnk4          | 69847       | 1.6 | 0.0143172 |
| 1416445_at   | family with sequence similarity 98, member A                             | Fam98a        | 72722       | 1.6 | 0.0004964 |
| 1425016_at   | Eph receptor B2                                                          | Ephb2         | 13844       | 1.6 | 0.0085781 |
| 1423709_s_at | phenylalanyl-tRNA synthetase, beta subunit                               | Farsb         | 23874       | 1.6 | 2.011E-06 |
| 1421305_x_at | rabaptin, RAB GTPase binding effector protein 1                          | Rabep1        | 54189       | 1.6 | 0.0002626 |
| 1439205_at   | nuclear factor of activated T-cells, cytoplasmic, calcineurin-dependent  | Nfatc2        | 18019       | 1.6 | 0.0007564 |
| 1416890_at   | WD repeat domain 74                                                      | Wdr74         | 107071      | 1.6 | 0.0008014 |
| 1441317_x_at | janus kinase and microtubule interacting protein 1                       | Jakmip1       | 76071       | 1.6 | 0.0069576 |
| 1437325_x_at | aldehyde dehydrogenase 18 family, member A1                              | Aldh18a1      | 56454       | 1.6 | 0.0001961 |
| 1448729_a_at | septin 4                                                                 |               | 40060 18952 | 1.6 | 0.0003348 |
| 1428353_at   | forkhead box K2                                                          | Foxk2         | 68837       | 1.6 | 0.0004206 |
| 1417823_at   | glycine C-acetyltransferase (2-amino-3-ketobutyrate-coenzyme A ligase)   | Gcat          | 26912       | 1.6 | 0.0091289 |
| 1416685_s_at | fibrillarin                                                              | Fbl           | 14113       | 1.6 | 0.0007817 |
| 1452012_a_at | exosome component 1                                                      | Exosc1        | 66583       | 1.6 | 0.0021947 |
| 1449870_a_at | ATPase, H+ transporting, lysosomal V0 subunit A2                         | Atp6v0a2      | 21871       | 1.6 | 0.0025035 |
| 1452340_at   | zinc finger protein 518B                                                 | Zfp518b       | 100515      | 1.6 | 0.0014185 |
| 1435674_at   | Rho-related BTB domain containing 2                                      | Rhobtb2       | 246710      | 1.6 | 0.0041302 |
| 1437985_a_at | RIKEN cDNA 2310061104 gene                                               | 2310061104Rik | 69662       | 1.6 | 0.0006135 |
| 1424274_at   | USO1 homolog, vesicle docking protein (yeast)                            | Uso1          | 56041       | 1.6 | 0.0003455 |
| 1417092_at   | parathyroid hormone 1 receptor                                           | Pth1r         | 19228       | 1.6 | 0.0236502 |
| 1424883_s_at | splicing factor, arginine/serine-rich 7                                  | Sfrs7         | 225027      | 1.5 | 0.0034548 |
| 1416815_s_at | budding uninhibited by benzimidazoles 3 homolog ( <i>S. cerevisiae</i> ) | Bub3          | 12237       | 1.5 | 0.0014007 |
| 1451979_at   | v-Ki-ras2 Kirsten rat sarcoma viral oncogene homolog                     | Kras          | 16653       | 1.5 | 0.0002937 |
| 1447602_x_at | sulfatase 2                                                              | Sulf2         | 72043       | 1.5 | 0.0028117 |
| 1421786_at   | protein phosphatase 3, regulatory subunit B, alpha isoform (calcineurin) | Ppp3r1        | 19058       | 1.5 | 0.0053705 |
| 1416569_at   | actin-like 6A                                                            | Actl6a        | 56456       | 1.5 | 0.0015861 |
| 1427127_x_at | heat shock protein 1B                                                    | Hspa1b        | 15511       | 1.5 | 0.0109565 |
| 1418137_at   | mitochondrial ribosomal protein 63                                       | Mrp63         | 67840       | 1.5 | 0.0004535 |
| 1430505_at   | transmembrane protein 219                                                | Tmem219       | 68742       | 1.5 | 0.008781  |

|              |                                                                        |               |        |     |           |
|--------------|------------------------------------------------------------------------|---------------|--------|-----|-----------|
| 1455899_x_at | suppressor of cytokine signaling 3                                     | Socs3         | 12702  | 1.5 | 0.0055514 |
| 1460036_at   | adaptor-related protein complex 1, sigma 2 subunit                     | Ap1s2         | 108012 | 1.5 | 0.0024898 |
| 1428315_at   | EBNA1 binding protein 2                                                | Ebna1bp2      | 69072  | 1.5 | 0.0001704 |
| 1449014_at   | lactamase, beta                                                        | Lactb         | 80907  | 1.5 | 0.0003465 |
| 1451218_at   | ER degradation enhancer, mannosidase alpha-like 1                      | Edem1         | 192193 | 1.5 | 0.0023479 |
| 1456434_x_at | heat shock protein 8                                                   | Hspb8         | 80888  | 1.5 | 0.0004389 |
| 1439741_x_at | uridine-cytidine kinase 2                                              | Uck2          | 80914  | 1.5 | 0.0056832 |
| 1448772_at   | ubiquitin-conjugating enzyme E2A, RAD6 homolog (S. cerevisiae)         | Ube2a         | 22209  | 1.5 | 0.0015127 |
| 1429177_x_at | SRY-box containing gene 17                                             | Sox17         | 20671  | 1.5 | 0.003886  |
| 1421033_a_at | transcription elongation regulator 1 (CA150)                           | Tcerg1        | 56070  | 1.5 | 0.0021885 |
| 1451742_a_at | UDP-glucose pyrophosphorylase 2                                        | Ugp2          | 216558 | 1.5 | 4.547E-05 |
| 1459240_at   | Transcription factor 25 (basic helix-loop-helix), mRNA (cDNA clone M   | Tcf25         | 66855  | 1.5 | 0.002771  |
| 1448153_at   | cytochrome c oxidase, subunit Va                                       | Cox5a         | 12858  | 1.5 | 0.0054953 |
| 1419173_at   | aminoacylase 1                                                         | Acy1          | 109652 | 1.5 | 0.0069102 |
| 1460486_at   | RAB GTPase activating protein 1                                        | Rabgap1       | 227800 | 1.5 | 0.0095352 |
| 1448564_at   | calcium and integrin binding 1 (calmyrin)                              | Cib1          | 23991  | 1.5 | 0.0064083 |
| 1460320_at   | beclin 1, autophagy related                                            | Becn1         | 56208  | 1.5 | 0.0025391 |
| 1435001_at   | phospholipase A2, activating protein                                   | Plaa          | 18786  | 1.5 | 0.0051821 |
| 1428390_at   | WD repeat domain 43                                                    | Wdr43         | 72515  | 1.5 | 0.0018498 |
| 1434773_a_at | solute carrier family 2 (facilitated glucose transporter), member 1    | Slc2a1        | 20525  | 1.5 | 0.0001047 |
| 1431939_a_at | myc induced nuclear antigen                                            | Mina          | 67014  | 1.5 | 0.0031744 |
| 1441568_at   | oxidative stress induced growth inhibitor family member 2              | Osgin2        | 209212 | 1.5 | 0.0035145 |
| 1418437_a_at | MAX-like protein X                                                     | Mlx           | 21428  | 1.5 | 0.0002612 |
| 1448170_at   | seven in absentia 2                                                    | Siah2         | 20439  | 1.5 | 0.0084096 |
| 1429758_at   | RIKEN cDNA 1700017B05 gene                                             | 1700017B05Rik | 74211  | 1.5 | 0.0012838 |
| 1435379_at   | URB2 ribosome biogenesis 2 homolog (S. cerevisiae)                     | Urb2          | 382038 | 1.5 | 0.0063163 |
| 1423766_at   | PAK1 interacting protein 1                                             | Pak1ip1       | 68083  | 1.5 | 0.0031286 |
| 1450909_at   | eukaryotic translation initiation factor 4E                            | Eif4e         | 13684  | 1.5 | 0.0001147 |
| 1421266_s_at | nuclear factor of kappa light polypeptide gene enhancer in B-cells inh | Nfkbib        | 18036  | 1.5 | 0.0061802 |
| 1435888_at   | epidermal growth factor receptor                                       | Egfr          | 13649  | 1.5 | 0.0016715 |
| 1437088_at   | SDA1 domain containing 1                                               | Sdad1         | 231452 | 1.5 | 0.0025018 |
| 1428950_s_at | nucleolar protein 8                                                    | Nol8          | 70930  | 1.5 | 0.0076725 |
| 1428506_at   | 5-aminoimidazole-4-carboxamide ribonucleotide formyltransferase/IM     | Atic          | 108147 | 1.5 | 5.441E-05 |
| 1432052_at   | Exosome component 1 (Exosc1), mRNA                                     | Exosc1        | 66583  | 1.5 | 0.0003127 |
| 1431226_a_at | fibronectin type III domain containing 4                               | Fndc4         | 64339  | 1.5 | 0.003839  |
| 1420867_at   | transmembrane emp24 domain trafficking protein 2                       | Tmed2         | 56334  | 1.5 | 0.049379  |
| 1457150_at   | expressed sequence AI428301                                            | AI428301      | 106201 | 1.5 | 0.0181041 |

|              |                                                                           |               |        |     |           |
|--------------|---------------------------------------------------------------------------|---------------|--------|-----|-----------|
| 1426960_a_at | fatty acid 2-hydroxylase                                                  | Fa2h          | 338521 | 1.5 | 0.0024438 |
| 1454674_at   | fasciculation and elongation protein zeta 1 (zygin I)                     | Fez1          | 235180 | 1.5 | 0.0099911 |
| 1423722_at   | transmembrane protein 49                                                  | Tmem49        | 75909  | 1.5 | 0.00681   |
| 1451649_a_at | WD repeat domain 75                                                       | Wdr75         | 73674  | 1.5 | 9.09E-05  |
| 1455019_x_at | cytoskeleton-associated protein 4                                         | Ckap4         | 216197 | 1.5 | 0.0001923 |
| 1439599_at   | galactose-3-O-sulfotransferase 2                                          | Gal3st2       | 381334 | 1.5 | 0.0149136 |
| 1453849_s_at | heterogeneous nuclear ribonucleoprotein A/B                               | Hnrnpab       | 15384  | 1.5 | 0.0010896 |
| 1457434_s_at | protein tyrosine phosphatase-like (proline instead of catalytic arginine) | Ptpla         | 30963  | 1.5 | 0.0032202 |
| 1448685_at   | RIKEN cDNA 2900010M23 gene                                                | 2900010M23Rik | 67267  | 1.5 | 0.0006904 |
| 1423575_a_at | Williams Beuren syndrome chromosome region 22                             | Wbscr22       | 66138  | 1.5 | 0.0001183 |
| 1433855_at   | 4-aminobutyrate aminotransferase                                          | Abat          | 268860 | 1.5 | 0.0018141 |
| 1454632_at   | RIKEN cDNA 6330442E10 gene                                                | 6330442E10Rik | 268567 | 1.5 | 0.0058694 |
| 1448100_at   | RIKEN cDNA 4833439L19 gene                                                | 4833439L19Rik | 97820  | 1.5 | 0.0019807 |
| 1456117_at   | ribosomal RNA processing 1 homolog B ( <i>S. cerevisiae</i> )             | Rrp1b         | 72462  | 1.5 | 0.0011384 |
| 1434882_at   | metadherin                                                                | Mtdh          | 67154  | 1.5 | 0.0031983 |
| 1452676_a_at | polyribonucleotide nucleotidyltransferase 1                               | Pnpt1         | 71701  | 1.5 | 0.0093017 |
| 1450904_at   | transmembrane protein 167                                                 | Tmem167       | 66074  | 1.5 | 0.0001275 |
| 1450873_at   | GTP binding protein 4                                                     | Gtpbp4        | 69237  | 1.5 | 0.0024447 |
| 1433692_at   | N-acetyltransferase 10                                                    | Nat10         | 98956  | 1.5 | 0.0037814 |
| 1452152_at   | clathrin interactor 1                                                     | Clint1        | 216705 | 1.5 | 0.0003114 |
| 1416726_s_at | ubiquitin-conjugating enzyme E2S                                          | Ube2s         | 77891  | 1.5 | 0.003153  |
| 1428350_at   | RIKEN cDNA 2310061F22 gene                                                | 2310061F22Rik | 66965  | 1.5 | 0.0032323 |
| 1417132_at   | cell division cycle 25 homolog A ( <i>S. pombe</i> )                      | Cdc25a        | 12530  | 1.5 | 0.0005554 |
| 1417083_at   | Sec61 beta subunit                                                        | Sec61b        | 66212  | 1.5 | 0.0008009 |
| 1432750_at   | zinc finger protein 711                                                   | Zfp711        | 245595 | 1.5 | 0.0012111 |
| 1424650_at   | protein disulfide isomerase associated 5                                  | Pdia5         | 72599  | 1.5 | 0.0007232 |
| 1416566_at   | serine/threonine kinase receptor associated protein                       | Strap         | 20901  | 1.5 | 0.00811   |
| 1428534_at   | nuclear receptor 2C2-associated protein                                   | Nr2c2ap       | 75692  | 1.5 | 0.0007206 |
| 1453007_at   | RIKEN cDNA 3110082I17 gene                                                | 3110082I17Rik | 73212  | 1.5 | 0.0004374 |
| 1455653_at   | cyclin J                                                                  | Ccnj          | 240665 | 1.5 | 0.0002762 |
| 1455991_at   | cysteine conjugate-beta lyase 2                                           | Ccbl2         | 229905 | 1.5 | 0.0025319 |
| 1451329_at   | nudix (nucleoside diphosphate linked moiety X)-type motif 22              | Nudt22        | 68323  | 1.5 | 0.0023915 |
| 1448475_at   | olfactomedin-like 3                                                       | Olfml3        | 99543  | 1.5 | 0.0038656 |
| 1426754_x_at | cytoskeleton-associated protein 4                                         | Ckap4         | 216197 | 1.5 | 4.721E-05 |
| 1438955_x_at | peptidylprolyl isomerase F (cyclophilin F)                                | Ppif          | 105675 | 1.5 | 0.005359  |
| 1454993_a_at | splicing factor, arginine/serine-rich 3 (SRp20)                           | Sfrs3         | 20383  | 1.5 | 0.000153  |
| 1450158_at   | rad and gem related GTP binding protein 1                                 | Rem1          | 19700  | 1.5 | 0.0036382 |

|            |            |      |        |     |           |
|------------|------------|------|--------|-----|-----------|
| 1454955_at | importin 7 | lpo7 | 233726 | 1.5 | 0.0034369 |
|------------|------------|------|--------|-----|-----------|

| SUPPLEMENTAL TABLE 2: List of Genes Down Regulated by P4 in SRC-2 <sup>ff</sup> (Control) Mice |                                                                       |               |           |             |           |
|------------------------------------------------------------------------------------------------|-----------------------------------------------------------------------|---------------|-----------|-------------|-----------|
| Probe set                                                                                      | Gene Title                                                            | Gene Symbol   | Entrez ID | Fold change | p value   |
| 1428837_at                                                                                     | kelch-like 14 (Drosophila)                                            | Klhl14        | 225266    | -10.7       | 0.0023643 |
| 1423367_at                                                                                     | wingless-related MMTV integration site 7A                             | Wnt7a         | 22421     | -9.2        | 0.0022056 |
| 1453231_at                                                                                     | cyclin-dependent kinase-like 1 (CDC2-related kinase)                  | Cdkl1         | 71091     | -8.5        | 0.0001965 |
| 1434800_at                                                                                     | synaptic vesicle glycoprotein 2 b                                     | Sv2b          | 64176     | -7.6        | 0.0004656 |
| 1451424_at                                                                                     | gamma-aminobutyric acid (GABA) A receptor, pi                         | Gabrp         | 216643    | -7.3        | 0.0092199 |
| 1429664_at                                                                                     | cyclin-dependent kinase-like 1 (CDC2-related kinase)                  | Cdkl1         | 71091     | -7.3        | 0.0031005 |
| 1449588_at                                                                                     | ATP-binding cassette, sub-family A (ABC1), member 4                   | Abca4         | 11304     | -6.5        | 2.857E-05 |
| 1457140_s_at                                                                                   | Ras association (RalGDS/AF-6) domain family (N-terminal) member       | Rassf10       | 78748     | -6.3        | 0.000605  |
| 1436532_at                                                                                     | doublecortin-like kinase 3                                            | Dclk3         | 245038    | -5.9        | 7.681E-05 |
| 1424647_at                                                                                     | gamma-aminobutyric acid (GABA) A receptor, pi                         | Gabrp         | 216643    | -5.6        | 0.0049577 |
| 1429567_at                                                                                     | Ras association (RalGDS/AF-6) domain family (N-terminal) member       | Rassf10       | 78748     | -5.5        | 0.0006194 |
| 1419717_at                                                                                     | sema domain, immunoglobulin domain (Ig), short basic domain, secreted | Sema3e        | 20349     | -5.2        | 1.679E-05 |
| 1442226_at                                                                                     | sema domain, immunoglobulin domain (Ig), short basic domain, secreted | Sema3e        | 20349     | -4.4        | 0.0025311 |
| 1428332_at                                                                                     | phosphoinositide-3-kinase interacting protein 1                       | Pik3ip1       | 216505    | -4.3        | 0.0003205 |
| 1416107_at                                                                                     | neuron specific gene family member 2                                  | Nsg2          | 18197     | -4.3        | 5.976E-05 |
| 1429891_at                                                                                     | calcyphosine-like                                                     | Capsl         | 75568     | -4.1        | 0.0115196 |
| 1439087_a_at                                                                                   | phosphoinositide-3-kinase interacting protein 1                       | Pik3ip1       | 216505    | -4.0        | 0.0011077 |
| 1448640_at                                                                                     | solute carrier family 14 (urea transporter), member 1                 | Slc14a1       | 108052    | -4.0        | 0.00039   |
| 1430143_at                                                                                     | RIKEN cDNA 4930426D05 gene                                            | 4930426D05Rik | 74644     | -3.9        | 0.0029205 |
| 1441975_at                                                                                     | acid phosphatase, prostate                                            | Acpp          | 56318     | -3.9        | 0.0003209 |
| 1417061_at                                                                                     | solute carrier family 40 (iron-regulated transporter), member 1       | Slc40a1       | 53945     | -3.9        | 0.0003086 |
| 1449545_at                                                                                     | fibroblast growth factor 18                                           | Fgf18         | 14172     | -3.6        | 0.0006758 |
| 1416306_at                                                                                     | chloride channel calcium activated 3                                  | Clca3         | 23844     | -3.5        | 0.0001892 |
| 1425848_a_at                                                                                   | dual specificity phosphatase 26 (putative)                            | Dusp26        | 66959     | -3.5        | 0.0006988 |
| 1438756_at                                                                                     | ankyrin repeat domain 29                                              | Ankrd29       | 225187    | -3.5        | 5.789E-05 |
| 1438718_at                                                                                     | fibroblast growth factor 9                                            | Fgf9          | 14180     | -3.5        | 0.0018904 |
| 1439757_s_at                                                                                   | Eph receptor A4                                                       | Epha4         | 13838     | -3.4        | 0.0055679 |
| 1443969_at                                                                                     | insulin receptor substrate 2                                          | Irs2          | 384783    | -3.4        | 0.0013058 |
| 1441926_x_at                                                                                   | transmembrane inner ear                                               | Tmie          | 20776     | -3.3        | 1.57E-05  |
| 1417155_at                                                                                     | v-myc myelocytomatosis viral related oncogene, neuroblastoma derived  | Mycn          | 18109     | -3.3        | 0.0015548 |
| 1438411_at                                                                                     | G protein-coupled receptor 81                                         | Gpr81         | 243270    | -3.3        | 0.0187851 |
| 1441338_at                                                                                     | RIKEN cDNA 5930412G12 gene                                            | 5930412G12Rik | 319616    | -3.3        | 8.517E-06 |
| 1436600_at                                                                                     | TOX high mobility group box family member 3                           | Tox3          | 244579    | -3.2        | 3.784E-06 |
| 1457589_at                                                                                     | FAT tumor suppressor homolog 3 (Drosophila)                           | Fat3          | 270120    | -3.2        | 0.0153863 |
| 1417522_at                                                                                     | F-box protein 32                                                      | Fbxo32        | 67731     | -3.2        | 0.0007463 |

|              |                                                                         |               |        |      |           |
|--------------|-------------------------------------------------------------------------|---------------|--------|------|-----------|
| 1428983_at   | scleraxis                                                               | Scx           | 20289  | -3.2 | 0.0002934 |
| 1448747_at   | F-box protein 32                                                        | Fbxo32        | 67731  | -3.2 | 0.0008686 |
| 1450448_at   | stanniocalcin 1                                                         | Stc1          | 20855  | -3.1 | 0.0004799 |
| 1436294_at   | ankyrin repeat domain 29                                                | Ankrd29       | 225187 | -3.1 | 0.0003358 |
| 1448227_at   | growth factor receptor bound protein 7                                  | Grb7          | 14786  | -3.1 | 0.0009666 |
| 1448566_at   | solute carrier family 40 (iron-regulated transporter), member 1         | Slc40a1       | 53945  | -3.1 | 0.0063127 |
| 1438567_at   | von Willebrand factor A domain containing 2                             | Vwa2          | 240675 | -3.1 | 0.0028321 |
| 1450780_s_at | high mobility group AT-hook 2                                           | Hmga2         | 15364  | -3.1 | 0.0011591 |
| 1450988_at   | leucine rich repeat containing G protein coupled receptor 5             | Lgr5          | 14160  | -3.1 | 0.002773  |
| 1450781_at   | high mobility group AT-hook 2                                           | Hmga2         | 15364  | -3.1 | 5.961E-05 |
| 1453442_at   | RIKEN cDNA 2310043M15 gene                                              | 2310043M15Rik | 71930  | -3.1 | 0.0154008 |
| 1422851_at   | high mobility group AT-hook 2                                           | Hmga2         | 15364  | -3.1 | 2.754E-05 |
| 1444687_at   | complement component 1, q subcomponent-like 2                           | C1ql2         | 226359 | -3.0 | 1.741E-05 |
| 1448789_at   | aldehyde dehydrogenase family 1, subfamily A3                           | Aldh1a3       | 56847  | -2.9 | 0.000314  |
| 1417000_at   | ankyrin repeat and BTB (POZ) domain containing 1                        | Abtb1         | 80283  | -2.9 | 9.837E-06 |
| 1415856_at   | embigin                                                                 | Emb           | 13723  | -2.9 | 0.0006981 |
| 1415871_at   | transforming growth factor, beta induced                                | Tgfb1         | 21810  | -2.9 | 2.454E-05 |
| 1441412_s_at | tripartite motif-containing 45                                          | Trim45        | 229644 | -2.9 | 0.0009534 |
| 1444139_at   | DNA-damage-inducible transcript 4-like                                  | Ddit4l        | 73284  | -2.9 | 0.0008435 |
| 1439395_at   | RIKEN cDNA 9630025I21 gene                                              | 9630025I21Rik | 408067 | -2.9 | 0.0006005 |
| 1448710_at   | chemokine (C-X-C motif) receptor 4                                      | Cxcr4         | 12767  | -2.9 | 0.0003416 |
| 1454646_at   | t-complex 11 (mouse) like 2                                             | Tcp11l2       | 216198 | -2.9 | 4.889E-05 |
| 1421929_at   | Eph receptor A4                                                         | Epha4         | 13838  | -2.9 | 0.018794  |
| 1457409_at   | fucosyltransferase 9                                                    | Fut9          | 14348  | -2.9 | 0.0118674 |
| 1435069_at   | cDNA sequence BC064078                                                  | BC064078      | 408064 | -2.9 | 0.0086508 |
| 1427512_a_at | laminin, alpha 3                                                        | Lama3         | 16774  | -2.9 | 0.00367   |
| 1420543_at   | DnaJ (Hsp40) homolog, subfamily C, member 28                            | Dnajc28       | 246738 | -2.8 | 0.000142  |
| 1418780_at   | cytochrome P450, family 39, subfamily a, polypeptide 1                  | Cyp39a1       | 56050  | -2.8 | 0.0005489 |
| 1435495_at   | adenosine A1 receptor                                                   | Adora1        | 11539  | -2.8 | 0.0123543 |
| 1452473_at   | proline rich 15                                                         | Prr15         | 78004  | -2.8 | 0.0013724 |
| 1429987_at   | RIKEN cDNA 9930013L23 gene                                              | 9930013L23Rik | 80982  | -2.8 | 0.0013924 |
| 1454880_s_at | BCL2 modifying factor                                                   | Bmf           | 171543 | -2.7 | 5.237E-05 |
| 1451751_at   | DNA-damage-inducible transcript 4-like                                  | Ddit4l        | 73284  | -2.7 | 3.4E-05   |
| 1428114_at   | solute carrier family 14 (urea transporter), member 1                   | Slc14a1       | 108052 | -2.7 | 0.0002095 |
| 1423271_at   | gap junction protein, beta 2                                            | Gjb2          | 14619  | -2.7 | 0.0037734 |
| 1426621_a_at | protein phosphatase 2 (formerly 2A), regulatory subunit B (PR 52), beta | Ppp2r2b       | 72930  | -2.7 | 1.243E-05 |
| 1428812_at   | RIKEN cDNA 1700040L02 gene                                              | 1700040L02Rik | 73287  | -2.7 | 0.0011224 |



|              |                                                                                 |               |        |      |           |
|--------------|---------------------------------------------------------------------------------|---------------|--------|------|-----------|
| 1418672_at   | aldo-keto reductase family 1, member C13                                        | Akr1c13       | 27384  | -2.7 | 0.0004241 |
| 1417066_at   | chaperone, ABC1 activity of bc1 complex like (S. pombe)                         | Cabc1         | 67426  | -2.7 | 0.0006669 |
| 1435135_at   | arylacetamide deacetylase-like 1                                                | Aadacl1       | 320024 | -2.7 | 0.0013903 |
| 1439680_at   | tumor necrosis factor (ligand) superfamily, member 10                           | Tnfsf10       | 22035  | -2.7 | 0.0005444 |
| 1427482_a_at | carbonic anhydrase 8                                                            | Car8          | 12319  | -2.6 | 0.0016428 |
| 1442113_at   | RIKEN cDNA 5330417C22 gene                                                      | 5330417C22Rik | 229722 | -2.6 | 0.0026819 |
| 1419323_at   | peptidyl arginine deiminase, type I                                             | Padi1         | 18599  | -2.6 | 0.0052965 |
| 1447808_s_at | solute carrier family 15 (H+/peptide transporter), member 2                     | Slc15a2       | 57738  | -2.6 | 0.0017021 |
| 1428651_at   | kelch-like 24 (Drosophila)                                                      | Klhl24        | 75785  | -2.6 | 2.281E-06 |
| 1437244_at   | growth arrest-specific 2 like 3                                                 | Gas2l3        | 237436 | -2.6 | 0.0020631 |
| 1437929_at   | dapper homolog 2, antagonist of beta-catenin (xenopus)                          | Dact2         | 240025 | -2.6 | 0.0004686 |
| 1437876_at   | interleukin 20 receptor beta                                                    | Il20rb        | 213208 | -2.6 | 0.0006652 |
| 1459913_at   | tumor necrosis factor (ligand) superfamily, member 10                           | Tnfsf10       | 22035  | -2.6 | 0.0042633 |
| 1439332_at   | DNA-damage-inducible transcript 4-like                                          | Ddit4l        | 73284  | -2.6 | 0.000356  |
| 1453509_at   | Ly6/Plaur domain containing 2                                                   | Lypd2         | 68311  | -2.6 | 0.0445577 |
| 1430336_at   | guanylate cyclase 2g                                                            | Gucy2g        | 73707  | -2.6 | 0.0008733 |
| 1418472_at   | aspartoacylase                                                                  | Aspa          | 11484  | -2.6 | 0.0010895 |
| 1455454_at   | aldo-keto reductase family 1, member C19                                        | Akr1c19       | 432720 | -2.6 | 0.0012225 |
| 1449519_at   | growth arrest and DNA-damage-inducible 45 alpha                                 | Gadd45a       | 13197  | -2.5 | 0.0005694 |
| 1437110_at   | RIKEN cDNA 2810474O19 gene                                                      | 2810474O19Rik | 67246  | -2.5 | 0.0001152 |
| 1417441_at   | DnaJ (Hsp40) homolog, subfamily C, member 12                                    | Dnajc12       | 30045  | -2.5 | 1.83E-05  |
| 1424354_at   | transmembrane protein 140                                                       | Tmem140       | 68487  | -2.5 | 0.0031477 |
| 1451453_at   | death-associated protein kinase 2                                               | Dapk2         | 13143  | -2.5 | 0.0001255 |
| 1425109_at   | solute carrier family 44, member 3                                              | Slc44a3       | 213603 | -2.5 | 0.002726  |
| 1457867_at   | sphingosine-1-phosphate phosphatase 2                                           | Sgpp2         | 433323 | -2.5 | 0.0013472 |
| 1423468_at   | STEAP family member 3                                                           | Steap3        | 68428  | -2.5 | 0.0010598 |
| 1415857_at   | embigin                                                                         | Emb           | 13723  | -2.5 | 0.0029621 |
| 1426864_a_at | neural cell adhesion molecule 1                                                 | Ncam1         | 17967  | -2.5 | 0.0012551 |
| 1442143_at   | anoctamin 4                                                                     | Ano4          | 320091 | -2.5 | 0.0013255 |
| 1450839_at   | DNA segment, human D4S114                                                       | D0H4S114      | 27528  | -2.5 | 0.0005612 |
| 1424730_a_at | solute carrier family 15 (H+/peptide transporter), member 2                     | Slc15a2       | 57738  | -2.5 | 0.0021877 |
| 1430700_a_at | phospholipase A2, group VII (platelet-activating factor acetylhydrolase)        | Pla2g7        | 27226  | -2.5 | 0.0016665 |
| 1439556_at   | neural cell adhesion molecule 1                                                 | Ncam1         | 17967  | -2.5 | 0.0057774 |
| 1421595_at   | family with sequence similarity 184, member B                                   | Fam184b       | 58227  | -2.5 | 0.0002202 |
| 1427387_a_at | integrin beta 4                                                                 | Itgb4         | 192897 | -2.5 | 0.0004761 |
| 1455220_at   | frequently rearranged in advanced T-cell lymphomas 2                            | Frat2         | 212398 | -2.5 | 0.0002931 |
| 1443536_at   | solute carrier family 7 (cationic amino acid transporter, y+ system), member 11 | Slc7a11       | 26570  | -2.5 | 0.0006333 |

|              |                                                                         |                    |           |      |           |
|--------------|-------------------------------------------------------------------------|--------------------|-----------|------|-----------|
| 1438519_at   | kelch-like 24 (Drosophila)                                              | Klhl24             | 75785     | -2.5 | 0.000851  |
| 1426865_a_at | neural cell adhesion molecule 1                                         | Ncam1              | 17967     | -2.5 | 9.141E-05 |
| 1434447_at   | met proto-oncogene                                                      | Met                | 17295     | -2.5 | 0.000178  |
| 1460336_at   | peroxisome proliferative activated receptor, gamma, coactivator 1 alpha | Ppargc1a           | 19017     | -2.4 | 0.0008911 |
| 1437661_at   | expressed sequence AU021092                                             | AU021092           | 239691    | -2.4 | 0.0002853 |
| 1443964_at   | transmembrane inner ear                                                 | Tmie               | 20776     | -2.4 | 0.0001545 |
| 1449311_at   | BTB and CNC homology 1                                                  | Bach1              | 12013     | -2.4 | 0.0342308 |
| 1417273_at   | pyruvate dehydrogenase kinase, isoenzyme 4                              | Pdk4               | 27273     | -2.4 | 0.0413317 |
| 1419155_a_at | SRY-box containing gene 4                                               | Sox4               | 20677     | -2.4 | 0.0060503 |
| 1448123_s_at | transforming growth factor, beta induced                                | Tgfb1              | 21810     | -2.4 | 1.302E-05 |
| 1453261_at   | RIKEN cDNA 2610035D17 gene                                              | 2610035D17Rik      | 72386     | -2.4 | 0.000141  |
| 1427334_s_at | RIKEN cDNA 2810474O19 gene                                              | 2810474O19Rik      | 67246     | -2.4 | 3.269E-05 |
| 1455980_a_at | growth arrest-specific 2 like 3                                         | Gas2l3             | 237436    | -2.4 | 0.0018128 |
| 1434028_at   | aryl hydrocarbon receptor nuclear translocator 2                        | Arnt2              | 11864     | -2.4 | 0.0006297 |
| 1422286_a_at | TGFB-induced factor homeobox 1                                          | Tgif1              | 21815     | -2.4 | 0.0010511 |
| 1440090_at   | Solute carrier family 25, member 27 (Slc25a27), nuclear gene encoding   | Slc25a27           | 74011     | -2.4 | 0.0002583 |
| 1455689_at   | frizzled homolog 10 (Drosophila)                                        | Fzd10              | 93897     | -2.4 | 0.0005463 |
| 1418359_at   | Williams Beuren syndrome chromosome region 27 (human)                   | Wbscr27            | 79565     | -2.4 | 0.0003074 |
| 1450713_at   | chondroitin sulfate proteoglycan 5                                      | Cspg5              | 29873     | -2.4 | 0.0021198 |
| 1419710_at   | neurexophilin 3                                                         | Nxph3              | 104079    | -2.4 | 0.0005124 |
| 1416111_at   | CD83 antigen                                                            | Cd83               | 12522     | -2.4 | 0.0006131 |
| 1447583_x_at | G protein-coupled estrogen receptor 1                                   | Gper               | 76854     | -2.3 | 0.0035333 |
| 1440973_at   | hypothetical LOC552874                                                  | LOC552874          | 552874    | -2.3 | 0.004372  |
| 1456395_at   | peroxisome proliferative activated receptor, gamma, coactivator 1 alpha | Ppargc1a           | 19017     | -2.3 | 0.0018296 |
| 1418979_at   | aldo-keto reductase family 1, member C14                                | Akr1c14            | 105387    | -2.3 | 0.0014356 |
| 1442514_a_at | elongation factor RNA polymerase II-like 3                              | Eif3               | 269344    | -2.3 | 0.0061717 |
| 1448793_a_at | syndecan 4                                                              | Sdc4               | 20971     | -2.3 | 0.0004397 |
| 1437463_x_at | transforming growth factor, beta induced                                | Tgfb1              | 21810     | -2.3 | 1.26E-05  |
| 1415997_at   | thioredoxin interacting protein                                         | Txnip              | 56338     | -2.3 | 0.0006863 |
| 1418417_at   | musculin                                                                | Msc                | 17681     | -2.3 | 0.0033864 |
| 1425792_a_at | RAR-related orphan receptor gamma                                       | Rorc               | 19885     | -2.3 | 0.0001956 |
| 1416564_at   | SRY-box containing gene 7                                               | Sox7               | 20680     | -2.3 | 0.0033719 |
| 1441506_at   | decorin                                                                 | Dcn                | 13179     | -2.3 | 0.0002745 |
| 1429351_at   | kelch-like 24 (Drosophila)                                              | Klhl24             | 75785     | -2.3 | 0.0023347 |
| 1424516_at   | RIKEN cDNA B230354K17 gene                                              | B230354K17Rik      | 320063    | -2.3 | 0.0002151 |
| 1419376_at   | fin bud initiation factor homolog (zebrafish)                           | Fibin              | 67606     | -2.3 | 0.0120548 |
| 1440759_at   | predicted gene, ENSMUSG00000074335                                      | ENSMUSG00000074335 | 100038499 | -2.3 | 7.996E-05 |

|              |                                                                       |               |           |      |           |
|--------------|-----------------------------------------------------------------------|---------------|-----------|------|-----------|
| 1417419_at   | cyclin D1                                                             | Ccnd1         | 12443     | -2.3 | 0.0025244 |
| 1455561_at   | carnosine dipeptidase 1 (metallopeptidase M20 family)                 | Cndp1         | 338403    | -2.3 | 0.0012321 |
| 1458330_x_at | Cyclin M3 (Cnnm3), transcript variant 1, mRNA                         | Cnnm3         | 94218     | -2.3 | 0.0002295 |
| 1437286_x_at | RIKEN cDNA 1110020G09 gene                                            | 1110020G09Rik | 68646     | -2.3 | 0.0006975 |
| 1424968_at   | RIKEN cDNA 2210023G05 gene                                            | 2210023G05Rik | 72361     | -2.3 | 0.0010027 |
| 1454617_at   | arrestin domain containing 3                                          | Arrdc3        | 105171    | -2.3 | 5.491E-05 |
| 1417991_at   | deiodinase, iodothyronine, type I                                     | Dio1          | 13370     | -2.3 | 0.0002005 |
| 1433919_at   | ankyrin repeat and SOCS box-containing 4                              | Asb4          | 65255     | -2.3 | 0.0092318 |
| 1456250_x_at | transforming growth factor, beta induced                              | Tgfb1         | 21810     | -2.3 | 4.455E-05 |
| 1427075_s_at | protein-L-isoaspartate (D-aspartate) O-methyltransferase domain con   | Pcmt2         | 245867    | -2.3 | 5.432E-06 |
| 1450376_at   | Max interacting protein 1                                             | Mxi1          | 17859     | -2.3 | 4.76E-05  |
| 1436739_at   | angiotensin II receptor, type 1a                                      | Agtr1a        | 11607     | -2.3 | 0.0009225 |
| 1426624_a_at | yippee-like 3 (Drosophila)                                            | Ypel3         | 66090     | -2.3 | 5.819E-06 |
| 1442368_at   | potassium channel tetramerisation domain containing 12b               | Kctd12b       | 207474    | -2.3 | 0.0008199 |
| 1453511_at   | RIKEN cDNA 2310007B03 gene                                            | 2310007B03Rik | 71874     | -2.3 | 0.021832  |
| 1429844_at   | RIKEN cDNA 2310043J07 gene                                            | 2310043J07Rik | 69665     | -2.3 | 0.0217866 |
| 1429236_at   | UDP-N-acetyl-alpha-D-galactosamine:polypeptide N-acetylgalactosa      | Galnt12       | 78754     | -2.3 | 0.0020661 |
| 1427074_at   | protein-L-isoaspartate (D-aspartate) O-methyltransferase domain con   | Pcmt2         | 245867    | -2.3 | 6.065E-06 |
| 1425793_a_at | RAR-related orphan receptor gamma                                     | Rorc          | 19885     | -2.3 | 0.0054035 |
| 1417234_at   | matrix metallopeptidase 11                                            | Mmp11         | 17385     | -2.3 | 0.0010195 |
| 1434315_at   | NIPA-like domain containing 3                                         | Nipal3        | 74552     | -2.3 | 2.806E-05 |
| 1450227_at   | ankyrin repeat domain 6                                               | Ankrd6        | 140577    | -2.3 | 0.0026757 |
| 1448906_at   | cadherin 16                                                           | Cdh16         | 12556     | -2.2 | 0.0359143 |
| 1440007_at   | RIKEN cDNA D930003E18 gene                                            | D930003E18Rik | 100048911 | -2.2 | 0.0086512 |
| 1453119_at   | OTU domain containing 1                                               | Otud1         | 71198     | -2.2 | 0.0009469 |
| 1424786_s_at | WD repeat domain 45                                                   | Wdr45         | 54636     | -2.2 | 6.457E-05 |
| 1441214_at   | exophilin 5                                                           | Exph5         | 320051    | -2.2 | 0.000783  |
| 1437217_at   | ankyrin repeat domain 6                                               | Ankrd6        | 140577    | -2.2 | 0.0002352 |
| 1433434_at   | expressed sequence AW551984                                           | AW551984      | 244810    | -2.2 | 0.0080892 |
| 1417673_at   | growth factor receptor bound protein 14                               | Grb14         | 50915     | -2.2 | 8.8E-05   |
| 1452841_at   | phosphoglucomutase 2-like 1                                           | Pgm2l1        | 70974     | -2.2 | 9.104E-05 |
| 1437751_at   | peroxisome proliferative activated receptor, gamma, coactivator 1 alp | Ppargc1a      | 19017     | -2.2 | 0.0005211 |
| 1419458_at   | Rho-guanine nucleotide exchange factor                                | Rgnef         | 110596    | -2.2 | 0.0007644 |
| 1427521_a_at | RIKEN cDNA 9930023K05 gene                                            | 9930023K05Rik | 226245    | -2.2 | 0.0003856 |
| 1424515_at   | RIKEN cDNA B230354K17 gene                                            | B230354K17Rik | 320063    | -2.2 | 2.263E-06 |
| 1426787_at   | Sfi1 homolog, spindle assembly associated (yeast)                     | Sfi1          | 78887     | -2.2 | 0.0002755 |
| 1449303_at   | Sestrin 3, mRNA (cDNA clone IMAGE:3481673)                            | Sesn3         | 75747     | -2.2 | 0.0006811 |

|              |                                                                   |               |        |      |           |
|--------------|-------------------------------------------------------------------|---------------|--------|------|-----------|
| 1427961_s_at | UDP glucuronosyltransferase 2 family, polypeptide B34             | Ugt2b34       | 100727 | -2.2 | 0.0315909 |
| 1434577_at   | cDNA sequence BC052040                                            | BC052040      | 399568 | -2.2 | 6.932E-05 |
| 1425245_a_at | regulator of G-protein signaling 11                               | Rgs11         | 50782  | -2.2 | 0.0044103 |
| 1434913_at   | 3-hydroxymethyl-3-methylglutaryl-Coenzyme A lyase-like 1          | Hmgcl1        | 208982 | -2.2 | 0.0020034 |
| 1437287_at   | RIKEN cDNA 1110020G09 gene                                        | 1110020G09Rik | 68646  | -2.2 | 0.0001284 |
| 1455553_at   | transmembrane protein 194B                                        | Tmem194b      | 227094 | -2.2 | 6.738E-05 |
| 1433600_at   | adrenergic receptor, alpha 2a                                     | Adra2a        | 11551  | -2.2 | 0.0005895 |
| 1428682_at   | zinc finger CCCH type containing 6                                | Zc3h6         | 78751  | -2.2 | 0.0252082 |
| 1436237_at   | tetratricopeptide repeat domain 9                                 | Ttc9          | 69480  | -2.2 | 0.0300263 |
| 1437302_at   | adrenergic receptor, beta 2                                       | Adrb2         | 11555  | -2.2 | 0.0013635 |
| 1417693_a_at | growth factor receptor bound protein 2-associated protein 1       | Gab1          | 14388  | -2.2 | 0.0001684 |
| 1420639_at   | junction-mediating and regulatory protein                         | Jmy           | 57748  | -2.2 | 0.006755  |
| 1454032_at   | neuropilin (NRP) and tolloid (TLL)-like 2                         | Neto2         | 74513  | -2.2 | 0.004156  |
| 1457054_a_at | RIKEN cDNA D130020L05 gene                                        | D130020L05Rik | 319760 | -2.2 | 0.0027799 |
| 1420444_at   | solute carrier family 22 (organic cation transporter), member 3   | Slc22a3       | 20519  | -2.2 | 0.0037647 |
| 1435198_at   | predicted gene, 545228                                            | 545228        | 545228 | -2.2 | 0.000877  |
| 1457321_at   | RIKEN cDNA D130037M23 gene                                        | D130037M23Rik | 328330 | -2.2 | 0.0027456 |
| 1432143_a_at | high mobility group box transcription factor 1                    | Hbp1          | 73389  | -2.1 | 0.0042691 |
| 1416482_at   | tetratricopeptide repeat domain 3                                 | Ttc3          | 22129  | -2.1 | 0.0149459 |
| 1434777_at   | v-myc myelocytomatosis viral oncogene homolog 1, lung carcinoma c | Mycl1         | 16918  | -2.1 | 0.0006258 |
| 1454984_at   | leukemia inhibitory factor receptor                               | Lifr          | 16880  | -2.1 | 0.0014124 |
| 1451754_a_at | WD repeat domain 45                                               | Wdr45         | 54636  | -2.1 | 0.0021712 |
| 1452195_s_at | Sfi1 homolog, spindle assembly associated (yeast)                 | Sfi1          | 78887  | -2.1 | 0.0006439 |
| 1453141_at   | RIKEN cDNA 0610009L18 gene                                        | 0610009L18Rik | 66838  | -2.1 | 0.0040313 |
| 1460367_at   | high mobility group box transcription factor 1                    | Hbp1          | 73389  | -2.1 | 0.0001071 |
| 1444262_at   | RIKEN cDNA 1110017F19 gene                                        | 1110017F19Rik | 68528  | -2.1 | 0.0008633 |
| 1447774_x_at | RIKEN cDNA 5730469M10 gene                                        | 5730469M10Rik | 70564  | -2.1 | 0.0023722 |
| 1417758_at   | integrin alpha 2b                                                 | Itga2b        | 16399  | -2.1 | 0.0009944 |
| 1420537_at   | potassium channel tetramerisation domain containing 4             | Kctd4         | 67516  | -2.1 | 0.0044027 |
| 1429021_at   | Eph receptor A4                                                   | Epha4         | 13838  | -2.1 | 0.0002914 |
| 1434156_at   | RAB11 family interacting protein 4 (class II)                     | Rab11fip4     | 268451 | -2.1 | 0.0015438 |
| 1434572_at   | histone deacetylase 9                                             | Hdac9         | 79221  | -2.1 | 0.0006905 |
| 1448978_at   | neuronal guanine nucleotide exchange factor                       | Ngef          | 53972  | -2.1 | 0.0011482 |
| 1452397_at   | RIKEN cDNA 2810474O19 gene                                        | 2810474O19Rik | 67246  | -2.1 | 0.0034925 |
| 1426911_at   | desmocollin 2                                                     | Dsc2          | 13506  | -2.1 | 0.0111401 |
| 1451690_a_at | poliovirus receptor-related 4                                     | Pvrl4         | 71740  | -2.1 | 0.0216349 |
| 1451516_at   | Ras homolog enriched in brain like 1                              | Rheb1         | 69159  | -2.1 | 1.441E-06 |

|              |                                                                        |               |        |      |           |
|--------------|------------------------------------------------------------------------|---------------|--------|------|-----------|
| 1437872_at   | N-acyl phosphatidylethanolamine phospholipase D                        | Napepld       | 242864 | -2.1 | 0.0052057 |
| 1436309_at   | neuropilin (NRP) and tolloid (TLL)-like 2                              | Neto2         | 74513  | -2.1 | 0.0011652 |
| 1456262_at   | RNA binding motif protein 5                                            | Rbm5          | 83486  | -2.1 | 0.0017567 |
| 1423659_a_at | TBC1 domain family, member 17                                          | Tbc1d17       | 233204 | -2.1 | 6.761E-05 |
| 1429235_at   | UDP-N-acetyl-alpha-D-galactosamine:polypeptide N-acetylgalactosa       | Galnt12       | 78754  | -2.1 | 0.0033927 |
| 1448825_at   | pyruvate dehydrogenase kinase, isoenzyme 2                             | Pdk2          | 18604  | -2.1 | 0.0006076 |
| 1417849_at   | zinc finger protein 704                                                | Zfp704        | 170753 | -2.1 | 0.0015308 |
| 1423310_at   | trophoblast glycoprotein                                               | Tpbg          | 21983  | -2.1 | 0.0002565 |
| 1452354_at   | RIKEN cDNA 2810459M11 gene                                             | 2810459M11Rik | 72792  | -2.1 | 0.0020231 |
| 1421346_a_at | solute carrier family 6 (neurotransmitter transporter, taurine), membe | Slc6a6        | 21366  | -2.1 | 0.0004118 |
| 1420683_at   | BCL2/adenovirus E1B 19kD interacting protein like                      | Bnpl          | 171388 | -2.1 | 0.007593  |
| 1453416_at   | growth arrest-specific 2 like 3                                        | Gas2l3        | 237436 | -2.1 | 0.0043227 |
| 1428835_at   | myosin, heavy polypeptide 14                                           | Myh14         | 71960  | -2.1 | 0.0322795 |
| 1447818_x_at | Ras homolog enriched in brain like 1                                   | Rheb1         | 69159  | -2.1 | 0.00048   |
| 1435703_at   | similar to RIKEN cDNA 2810457I06                                       | LOC677224     | 677224 | -2.1 | 0.0008215 |
| 1437765_at   | cytoplasmic polyadenylation element binding protein 3                  | Cpeb3         | 208922 | -2.1 | 0.0040144 |
| 1427367_at   | EF-hand calcium binding domain 4A                                      | Efcab4a       | 213573 | -2.1 | 0.0096    |
| 1460204_at   | tec protein tyrosine kinase                                            | Tec           | 21682  | -2.1 | 0.000346  |
| 1436033_at   | cDNA sequence BC031353                                                 | BC031353      | 235493 | -2.1 | 1.896E-06 |
| 1434784_s_at | transmembrane protein 106C                                             | Tmem106c      | 380967 | -2.0 | 0.0005393 |
| 1451888_a_at | odd Oz/ten-m homolog 4 (Drosophila)                                    | Odz4          | 23966  | -2.0 | 0.0061246 |
| 1419070_at   | cystin 1                                                               | Cys1          | 12879  | -2.0 | 0.0023334 |
| 1424034_at   | RAR-related orphan receptor alpha                                      | Rora          | 19883  | -2.0 | 0.0003674 |
| 1438628_x_at | contactin 3                                                            | Cntn3         | 18488  | -2.0 | 0.0288382 |
| 1439293_at   | cDNA sequence BC031353                                                 | BC031353      | 235493 | -2.0 | 0.0004853 |
| 1424180_a_at | mediator complex subunit 24                                            | Med24         | 23989  | -2.0 | 0.0008613 |
| 1423422_at   | ankyrin repeat and SOCS box-containing 4                               | Asb4          | 65255  | -2.0 | 0.0022736 |
| 1417028_a_at | tripartite motif-containing 2                                          | Trim2         | 80890  | -2.0 | 8.315E-05 |
| 1442531_at   | DNA segment, Chr 12, ERATO Doi 123, expressed                          | D12Ert123e    | 52532  | -2.0 | 0.0001771 |
| 1437252_at   | GATS protein-like 2                                                    | Gatsl2        | 80909  | -2.0 | 0.0059373 |
| 1453004_at   | solute carrier family 22, member 23                                    | Slc22a23      | 73102  | -2.0 | 0.0007467 |
| 1419056_at   | reticulon 2 (Z-band associated protein)                                | Rtn2          | 20167  | -2.0 | 0.0007617 |
| 1417694_at   | growth factor receptor bound protein 2-associated protein 1            | Gab1          | 14388  | -2.0 | 0.0006133 |
| 1453313_at   | sestrin 3                                                              | Sesn3         | 75747  | -2.0 | 2.888E-05 |
| 1426584_a_at | sorbitol dehydrogenase                                                 | Sord          | 20322  | -2.0 | 0.0006376 |
| 1453571_at   | DEP domain containing 6                                                | Depdc6        | 97998  | -2.0 | 0.0027452 |
| 1437900_at   | RIKEN cDNA 4930523C07 gene                                             | 4930523C07Rik | 67647  | -2.0 | 0.0002118 |

|              |                                                                 |               |        |      |           |
|--------------|-----------------------------------------------------------------|---------------|--------|------|-----------|
| 1433743_at   | dachshund 1 (Drosophila)                                        | Dach1         | 13134  | -2.0 | 0.0007322 |
| 1457038_at   | Fras1 related extracellular matrix protein 2                    | Frem2         | 242022 | -2.0 | 0.0015023 |
| 1425767_a_at | sine oculis-related homeobox 4 homolog (Drosophila)             | Six4          | 20474  | -2.0 | 0.0003746 |
| 1422941_at   | wingless-related MMTV integration site 16                       | Wnt16         | 93735  | -2.0 | 0.0003967 |
| 1435657_at   | stonin 2                                                        | Ston2         | 108800 | -2.0 | 0.0011544 |
| 1435993_at   | predicted gene, OTTMUSG00000000421                              | OTTMUSG0000   | 544922 | -2.0 | 0.0105036 |
| 1422178_a_at | RAB17, member RAS oncogene family                               | Rab17         | 19329  | -2.0 | 0.0024568 |
| 1416923_a_at | BCL2/adenovirus E1B interacting protein 3-like                  | Bnip3l        | 12177  | -2.0 | 3.336E-05 |
| 1420518_a_at | immunoglobulin superfamily, member 9                            | Igsf9         | 93842  | -2.0 | 0.0089861 |
| 1417814_at   | phospholipase A2, group V                                       | Pla2g5        | 18784  | -2.0 | 0.0004353 |
| 1452861_at   | RIKEN cDNA 2010300C02 gene                                      | 2010300C02Rik | 72097  | -2.0 | 0.006481  |
| 1433668_at   | proline-rich nuclear receptor coactivator 1                     | Pnrc1         | 108767 | -2.0 | 0.0004445 |
| 1455242_at   | forkhead box P1                                                 | Foxp1         | 108655 | -2.0 | 0.0003988 |
| 1437667_a_at | BTB and CNC homology 2                                          | Bach2         | 12014  | -2.0 | 0.0006984 |
| 1429779_at   | eukaryotic translation initiation factor 2C, 4                  | Eif2c4        | 76850  | -2.0 | 0.0021419 |
| 1459860_x_at | tripartite motif-containing 2                                   | Trim2         | 80890  | -2.0 | 0.0007377 |
| 1451418_a_at | splA/ryanodine receptor domain and SOCS box containing 4        | Spsb4         | 211949 | -2.0 | 0.0369229 |
| 1417343_at   | FXD domain-containing ion transport regulator 6                 | Fxd6          | 59095  | -2.0 | 0.0027293 |
| 1423893_x_at | amyloid beta (A4) precursor protein-binding, family B, member 1 | Apbb1         | 11785  | -2.0 | 0.0018917 |
| 1438012_at   | protein phosphatase 1 (formerly 2C)-like                        | Ppm1l         | 242083 | -2.0 | 0.0054272 |
| 1419140_at   | activin receptor IIB                                            | Acvr2b        | 11481  | -2.0 | 0.0007024 |
| 1449878_a_at | solute carrier family 12, member 6                              | Slc12a6       | 107723 | -2.0 | 0.0072881 |
| 1438069_a_at | RNA binding motif protein 5                                     | Rbm5          | 83486  | -2.0 | 0.0007613 |
| 1434628_a_at | rhopilin, Rho GTPase binding protein 2                          | Rhpn2         | 52428  | -2.0 | 0.003449  |
| 1421140_a_at | forkhead box P1                                                 | Foxp1         | 108655 | -2.0 | 0.0001138 |
| 1436591_at   | cDNA sequence BC023744                                          | BC023744      | 231668 | -2.0 | 0.001453  |
| 1448379_at   | protection of telomeres 1A                                      | Pot1a         | 101185 | -2.0 | 2.431E-05 |
| 1418280_at   | Kruppel-like factor 6                                           | Klf6          | 23849  | -2.0 | 0.0009523 |
| 1426565_at   | insulin-like growth factor I receptor                           | Igf1r         | 16001  | -2.0 | 0.0005114 |
| 1452360_a_at | lysine (K)-specific demethylase 5A                              | Kdm5a         | 214899 | -2.0 | 0.0075585 |
| 1436326_at   | RAR-related orphan receptor alpha                               | Rora          | 19883  | -2.0 | 0.0191084 |
| 1418311_at   | fructosamine 3 kinase                                           | Fn3k          | 63828  | -2.0 | 0.0011666 |
| 1424072_at   | RIKEN cDNA 2010107G23 gene                                      | 2010107G23Rik | 69894  | -2.0 | 0.001073  |
| 1428988_at   | ATP-binding cassette, sub-family C (CFTR/MRP), member 3         | Abcc3         | 76408  | -2.0 | 0.0050836 |
| 1419457_at   | Rho-guanine nucleotide exchange factor                          | Rgnef         | 110596 | -2.0 | 0.00012   |
| 1435207_at   | DIX domain containing 1                                         | Dixdc1        | 330938 | -2.0 | 0.0007823 |
| 1427633_a_at | pregnancy-associated plasma protein A                           | Pappa         | 18491  | -2.0 | 0.0338248 |

|              |                                                                   |               |        |      |           |
|--------------|-------------------------------------------------------------------|---------------|--------|------|-----------|
| 1452507_at   | distal-less homeobox 6                                            | Dlx6          | 13396  | -2.0 | 0.0061251 |
| 1417377_at   | cell adhesion molecule 1                                          | Cadm1         | 54725  | -2.0 | 0.0009113 |
| 1456478_at   | phosphoglucomutase 2-like 1                                       | Pgm2l1        | 70974  | -2.0 | 0.0002398 |
| 1417839_at   | claudin 5                                                         | Cldn5         | 12741  | -2.0 | 0.0014728 |
| 1431805_a_at | rhophilin, Rho GTPase binding protein 2                           | Rhpn2         | 52428  | -1.9 | 0.0046261 |
| 1452336_at   | zinc finger protein 395                                           | Zfp395        | 380912 | -1.9 | 0.0019512 |
| 1434171_at   | RIKEN cDNA C330011K17 gene                                        | C330011K17Rik | 238692 | -1.9 | 0.0040737 |
| 1418051_at   | Eph receptor B6                                                   | Ephb6         | 13848  | -1.9 | 0.0094239 |
| 1417376_a_at | cell adhesion molecule 1                                          | Cadm1         | 54725  | -1.9 | 0.0007737 |
| 1452935_at   | predicted gene, EG546143                                          | EG546143      | 546143 | -1.9 | 0.0028641 |
| 1427307_a_at | disabled homolog 1 (Drosophila)                                   | Dab1          | 13131  | -1.9 | 0.0045914 |
| 1441213_at   | cDNA sequence BC021891                                            | BC021891      | 234878 | -1.9 | 0.0100582 |
| 1424187_at   | coiled-coil domain containing 80                                  | Ccdc80        | 67896  | -1.9 | 5.09E-05  |
| 1431204_at   | RIKEN cDNA 4930578N16 gene                                        | 4930578N16Rik | 75051  | -1.9 | 0.0088872 |
| 1421955_a_at | neural precursor cell expressed, developmentally down-regulated 4 | Nedd4         | 17999  | -1.9 | 0.0261311 |
| 1418018_at   | carboxypeptidase D                                                | Cpd           | 12874  | -1.9 | 0.0236211 |
| 1435991_at   | nuclear receptor subfamily 3, group C, member 2                   | Nr3c2         | 110784 | -1.9 | 0.0041296 |
| 1436736_x_at | DNA segment, human D4S114                                         | D0H4S114      | 27528  | -1.9 | 0.001081  |
| 1437668_at   | Chemokine (C-C motif) receptor-like 1 (Ccr1), mRNA                | Ccr1          | 252837 | -1.9 | 0.0039451 |
| 1438677_at   | plakophilin 4                                                     | Pkp4          | 227937 | -1.9 | 0.0006242 |
| 1445418_at   | Smg-6 homolog, nonsense mediated mRNA decay factor (C. elegans)   | Smg6          | 103677 | -1.9 | 0.0090583 |
| 1447901_x_at | Sfi1 homolog, spindle assembly associated (yeast)                 | Sfi1          | 78887  | -1.9 | 0.0006213 |
| 1428066_at   | coiled-coil domain containing 120                                 | Ccdc120       | 54648  | -1.9 | 0.0044851 |
| 1419906_at   | Hydroxyprostaglandin dehydrogenase 15 (NAD), mRNA (cDNA clone)    | Hpgd          | 15446  | -1.9 | 0.0016531 |
| 1451793_at   | kelch-like 24 (Drosophila)                                        | Klhl24        | 75785  | -1.9 | 0.0009402 |
| 1418260_at   | hormonally upregulated Neu-associated kinase                      | Hunk          | 26559  | -1.9 | 0.0010028 |
| 1456005_a_at | BCL2-like 11 (apoptosis facilitator)                              | Bcl2l11       | 12125  | -1.9 | 0.0002071 |
| 1460163_at   | C1q and tumor necrosis factor related protein 7                   | C1qtnf7       | 109323 | -1.9 | 0.0012922 |
| 1455227_at   | arylacetamide deacetylase-like 1                                  | Aadacl1       | 320024 | -1.9 | 0.0009    |
| 1429679_at   | leucine rich repeat containing 17                                 | Lrrc17        | 74511  | -1.9 | 0.0013255 |
| 1450337_a_at | NIMA (never in mitosis gene a)-related expressed kinase 8         | Nek8          | 140859 | -1.9 | 0.0084964 |
| 1420481_at   | cyclin M3                                                         | Cnm3          | 94218  | -1.9 | 0.000812  |
| 1440787_s_at | Bardet-Biedl syndrome 10 (human)                                  | Bbs10         | 71769  | -1.9 | 0.0054698 |
| 1449734_s_at | Bardet-Biedl syndrome 4 (human)                                   | Bbs4          | 102774 | -1.9 | 0.0003095 |
| 1435296_at   | adrenergic receptor, alpha 2c                                     | Adra2c        | 11553  | -1.9 | 0.0016001 |
| 1416315_at   | abhydrolase domain containing 4                                   | Abhd4         | 105501 | -1.9 | 0.0001797 |
| 1438937_x_at | angiogenin, ribonuclease, RNase A family, 5                       | Ang           | 11727  | -1.9 | 0.0053569 |

|              |                                                                   |               |        |      |           |
|--------------|-------------------------------------------------------------------|---------------|--------|------|-----------|
| 1451650_at   | D-aspartate oxidase                                               | Ddo           | 70503  | -1.9 | 0.0370814 |
| 1417214_at   | RAB27b, member RAS oncogene family                                | Rab27b        | 80718  | -1.9 | 0.0230896 |
| 1450967_at   | protein tyrosine phosphatase-like A domain containing 2           | Ptplad2       | 66775  | -1.9 | 0.0030338 |
| 1439096_at   | D-aspartate oxidase                                               | Ddo           | 70503  | -1.9 | 0.0050634 |
| 1417520_at   | nuclear factor, erythroid derived 2, like 3                       | Nfe2l3        | 18025  | -1.9 | 0.0023584 |
| 1449370_at   | SRY-box containing gene 4                                         | Sox4          | 20677  | -1.9 | 0.0062962 |
| 1417848_at   | zinc finger protein 704                                           | Zfp704        | 170753 | -1.9 | 0.0009922 |
| 1450151_at   | zinc finger protein 316                                           | Zfp316        | 54201  | -1.9 | 0.0014011 |
| 1449167_at   | erythrocyte protein band 4.1-like 4a                              | Epb4.1l4a     | 13824  | -1.9 | 0.0009722 |
| 1419759_at   | ATP-binding cassette, sub-family B (MDR/TAP), member 1A           | Abcb1a        | 18671  | -1.9 | 0.0004421 |
| 1451527_at   | procollagen C-endopeptidase enhancer 2                            | Pcolce2       | 76477  | -1.9 | 0.0084286 |
| 1436187_at   | RIKEN cDNA 1110054M08 gene                                        | 1110054M08Rik | 68841  | -1.9 | 0.0044468 |
| 1457827_at   | arylsulfatase J                                                   | Arsj          | 271970 | -1.9 | 0.0059919 |
| 1452716_at   | RIKEN cDNA 5730469M10 gene                                        | 5730469M10Rik | 70564  | -1.9 | 0.00095   |
| 1418045_at   | inositol polyphosphate-1-phosphatase                              | Inpp1         | 16329  | -1.9 | 0.0006871 |
| 1457915_at   | RIKEN cDNA 4833442J19 gene                                        | 4833442J19Rik | 320204 | -1.9 | 3.617E-05 |
| 1437657_at   | S phase cyclin A-associated protein in the ER                     | Scaper        | 244891 | -1.9 | 0.0014911 |
| 1455794_at   | smoothelin-like 2                                                 | Smtnl2        | 276829 | -1.9 | 0.0009455 |
| 1451103_at   | HAUS augmin-like complex, subunit 4                               | Haus4         | 219072 | -1.9 | 0.0006565 |
| 1449509_at   | small EDRK-rich factor 1                                          | Serf1         | 20365  | -1.9 | 0.0336364 |
| 1448525_a_at | BCL2/adenovirus E1B interacting protein 3-like                    | Bnip3l        | 12177  | -1.9 | 0.0004714 |
| 1417378_at   | cell adhesion molecule 1                                          | Cadm1         | 54725  | -1.9 | 0.0002149 |
| 1419639_at   | ephrin B2                                                         | Efnb2         | 13642  | -1.9 | 0.000702  |
| 1454803_a_at | histone deacetylase 11                                            | Hdac11        | 232232 | -1.9 | 0.0009484 |
| 1417812_a_at | laminin, beta 3                                                   | Lamb3         | 16780  | -1.9 | 0.0493547 |
| 1436515_at   | BTB and CNC homology 2                                            | Bach2         | 12014  | -1.9 | 4.4E-06   |
| 1419133_at   | envoplakin                                                        | Evpl          | 14027  | -1.9 | 0.0095843 |
| 1418607_at   | zinc finger with KRAB and SCAN domains 14                         | Zkscan14      | 67235  | -1.9 | 0.0006446 |
| 1427357_at   | cytidine deaminase                                                | Cda           | 72269  | -1.9 | 0.0050322 |
| 1435494_s_at | desmoplakin                                                       | Dsp           | 109620 | -1.9 | 0.0048715 |
| 1439022_at   | phosphatase and actin regulator 1                                 | Phactr1       | 218194 | -1.9 | 0.0019391 |
| 1437633_at   | ankyrin repeat domain 11                                          | Ankrd11       | 77087  | -1.9 | 0.0006048 |
| 1427180_at   | solute carrier family 27 (fatty acid transporter), member 3       | Slc27a3       | 26568  | -1.9 | 0.0007911 |
| 1455450_at   | protein tyrosine phosphatase, non-receptor type 3                 | Ptpn3         | 545622 | -1.9 | 0.000225  |
| 1429503_at   | family with sequence similarity 69, member A                      | Fam69a        | 67266  | -1.9 | 0.0004099 |
| 1416922_a_at | BCL2/adenovirus E1B interacting protein 3-like                    | Bnip3l        | 12177  | -1.9 | 6.187E-05 |
| 1416418_at   | gamma-aminobutyric acid (GABA) A receptor-associated protein-like | Gabarapl1     | 57436  | -1.9 | 0.0019804 |



|              |                                                                       |               |        |      |           |
|--------------|-----------------------------------------------------------------------|---------------|--------|------|-----------|
| 1451589_at   | GATS protein-like 2                                                   | Gatsl2        | 80909  | -1.9 | 0.0009045 |
| 1456481_at   | family with sequence similarity 62, member C                          | Fam62c        | 272636 | -1.9 | 0.0035161 |
| 1429727_at   | solute carrier family 16 (monocarboxylic acid transporters), member 9 | Slc16a9       | 66859  | -1.9 | 0.000867  |
| 1418762_at   | CD55 antigen                                                          | Cd55          | 13136  | -1.9 | 0.0029554 |
| 1431892_a_at | phospholipase C, delta 3                                              | Plcd3         | 72469  | -1.9 | 0.0011849 |
| 1437241_at   | Kruppel-like factor 11                                                | Klf11         | 194655 | -1.9 | 0.0330361 |
| 1426566_s_at | interleukin 17 receptor E                                             | Il17re        | 57890  | -1.9 | 0.0019185 |
| 1427182_s_at | DNA segment, Chr 18, ERATO Doi 653, expressed                         | D18Ertdd653e  | 52662  | -1.9 | 0.0034044 |
| 1439884_at   | nudix (nucleoside diphosphate linked moiety X)-type motif 16          | Nudt16        | 75686  | -1.9 | 0.0007514 |
| 1426263_at   | cell adhesion molecule 4                                              | Cadm4         | 260299 | -1.9 | 0.0077861 |
| 1427202_at   | RIKEN cDNA 4833442J19 gene                                            | 4833442J19Rik | 320204 | -1.9 | 0.0001618 |
| 1426464_at   | nuclear receptor subfamily 1, group D, member 1                       | Nr1d1         | 217166 | -1.9 | 0.0015602 |
| 1455607_at   | R-spondin 3 homolog ( <i>Xenopus laevis</i> )                         | Rspo3         | 72780  | -1.9 | 0.0042211 |
| 1428758_at   | transmembrane protein 86A                                             | Tmem86a       | 67893  | -1.9 | 0.0006401 |
| 1453377_at   | SH2 domain containing 4A                                              | Sh2d4a        | 72281  | -1.9 | 0.0199726 |
| 1419156_at   | SRY-box containing gene 4                                             | Sox4          | 20677  | -1.9 | 0.0039247 |
| 1421048_a_at | yippee-like 1 ( <i>Drosophila</i> )                                   | Ypel1         | 106369 | -1.9 | 0.0075511 |
| 1423311_s_at | trophoblast glycoprotein                                              | Tpbp          | 21983  | -1.9 | 0.0001743 |
| 1451991_at   | Eph receptor A7                                                       | Epha7         | 13841  | -1.9 | 0.0031806 |
| 1427155_at   | FCH and double SH3 domains 1                                          | Fchsd1        | 319262 | -1.9 | 0.0062516 |
| 1453645_at   | RIKEN cDNA 2700046A07 gene                                            | 2700046A07Rik | 78449  | -1.8 | 0.0028871 |
| 1436990_s_at | coiled-coil-helix-coiled-coil-helix domain containing 10              | Chchd10       | 103172 | -1.8 | 0.0013784 |
| 1442119_at   | expressed sequence AI449212                                           | AI449212      | 100653 | -1.8 | 0.0013336 |
| 1439689_at   | RIKEN cDNA 9030224M15 gene                                            | 9030224M15Rik | 327747 | -1.8 | 0.003489  |
| 1434530_at   | odd Oz/ten-m homolog 4 ( <i>Drosophila</i> )                          | Odz4          | 23966  | -1.8 | 0.0077592 |
| 1431754_at   | RIKEN cDNA 4930578N16 gene                                            | 4930578N16Rik | 75051  | -1.8 | 0.0097988 |
| 1424433_at   | methionine sulfoxide reductase B2                                     | Msrb2         | 76467  | -1.8 | 0.0005262 |
| 1425732_a_at | Max interacting protein 1                                             | Mxi1          | 17859  | -1.8 | 0.0020902 |
| 1428523_at   | latrophilin 3                                                         | Lphn3         | 319387 | -1.8 | 0.00746   |
| 1453103_at   | actin-binding LIM protein 1                                           | Ablim1        | 226251 | -1.8 | 0.0009036 |
| 1435222_at   | forkhead box P1                                                       | Foxp1         | 108655 | -1.8 | 0.0006151 |
| 1421034_a_at | interleukin 4 receptor, alpha                                         | Il4ra         | 16190  | -1.8 | 7.957E-05 |
| 1434101_at   | nuclear factor I/B                                                    | Nfib          | 18028  | -1.8 | 0.0009265 |
| 1448509_at   | family with sequence similarity 107, member B                         | Fam107b       | 66540  | -1.8 | 0.0012153 |
| 1429089_s_at | RIKEN cDNA 2900026A02 gene                                            | 2900026A02Rik | 243219 | -1.8 | 0.0001089 |
| 1428375_at   | RIKEN cDNA 4932415G12 gene                                            | 4932415G12Rik | 67723  | -1.8 | 0.0074722 |
| 1451229_at   | histone deacetylase 11                                                | Hdac11        | 232232 | -1.8 | 0.0041743 |

|              |                                                                      |               |           |      |           |
|--------------|----------------------------------------------------------------------|---------------|-----------|------|-----------|
| 1418713_at   | pterin 4 alpha carbinolamine dehydratase/dimerization cofactor of he | Pcbd1         | 13180     | -1.8 | 0.027298  |
| 1447551_x_at | latrophilin 3                                                        | Lphn3         | 319387    | -1.8 | 0.0045968 |
| 1452358_at   | retinoic acid induced 2                                              | Rai2          | 24004     | -1.8 | 0.0054715 |
| 1435221_at   | forkhead box P1                                                      | Foxp1         | 108655    | -1.8 | 5.09E-05  |
| 1424598_at   | DEAD (Asp-Glu-Ala-Asp) box polypeptide 6                             | Ddx6          | 13209     | -1.8 | 0.0081998 |
| 1417995_at   | protein tyrosine phosphatase, non-receptor type 22 (lymphoid)        | Ptpn22        | 19260     | -1.8 | 0.0027838 |
| 1417248_at   | ralA binding protein 1                                               | Ralbp1        | 19765     | -1.8 | 0.0001809 |
| 1433720_s_at | coiled-coil-helix-coiled-coil-helix domain containing 10             | Chchd10       | 103172    | -1.8 | 0.0014191 |
| 1426818_at   | arrestin domain containing 4                                         | Arrdc4        | 66412     | -1.8 | 0.0131091 |
| 1451764_at   | MARVEL (membrane-associating) domain containing 3                    | Marveld3      | 73608     | -1.8 | 0.0071536 |
| 1449911_at   | lymphocyte-activation gene 3                                         | Lag3          | 16768     | -1.8 | 0.0018202 |
| 1448147_at   | tumor necrosis factor receptor superfamily, member 19                | Tnfrsf19      | 29820     | -1.8 | 0.0001274 |
| 1438699_at   | steroid 5 alpha-reductase 1                                          | Srd5a1        | 78925     | -1.8 | 0.0068494 |
| 1426165_a_at | caspase 3                                                            | Casp3         | 12367     | -1.8 | 0.0043842 |
| 1426780_at   | DNA segment, Chr 14, ERATO Doi 436, expressed                        | D14Ert436e    | 218978    | -1.8 | 0.0003979 |
| 1450861_at   | Fanconi anemia, complementation group C                              | Fancc         | 14088     | -1.8 | 0.005766  |
| 1435493_at   | desmoplakin                                                          | Dsp           | 109620    | -1.8 | 0.0015142 |
| 1430543_at   | CAP-GLY domain containing linker protein 3                           | Clip3         | 76686     | -1.8 | 0.0061521 |
| 1443579_s_at | DEP domain containing 6                                              | Depdc6        | 97998     | -1.8 | 0.0042952 |
| 1455993_at   | odd Oz/ten-m homolog 4 (Drosophila)                                  | Odz4          | 23966     | -1.8 | 0.0037273 |
| 1443640_at   | Zinc finger protein 617 (Zfp617), mRNA                               | Zfp617        | 170938    | -1.8 | 0.006259  |
| 1423672_at   | tetratricopeptide repeat domain 30B                                  | Ttc30b        | 72421     | -1.8 | 1.724E-05 |
| 1421011_at   | hydroxysteroid (17-beta) dehydrogenase 11                            | Hsd17b11      | 114664    | -1.8 | 0.0014145 |
| 1435321_at   | LIM and calponin homology domains 1                                  | Limch1        | 77569     | -1.8 | 0.0001988 |
| 1418174_at   | D site albumin promoter binding protein                              | Dbp           | 13170     | -1.8 | 0.0052968 |
| 1434130_at   | lipoma HMGIC fusion partner-like 2                                   | Lhfpl2        | 218454    | -1.8 | 0.0001505 |
| 1434581_at   | RIKEN cDNA 2410066E13 gene                                           | 2410066E13Rik | 68235     | -1.8 | 0.0006507 |
| 1460440_at   | latrophilin 3                                                        | Lphn3         | 319387    | -1.8 | 0.0406616 |
| 1435171_at   | RIKEN cDNA 2810416G20 gene                                           | 2810416G20Rik | 100040353 | -1.8 | 0.0087946 |
| 1428622_at   | DEP domain containing 6                                              | Depdc6        | 97998     | -1.8 | 0.0059781 |
| 1435184_at   | natriuretic peptide receptor 3                                       | Npr3          | 18162     | -1.8 | 0.0018525 |
| 1432590_at   | RIKEN cDNA 4930573O21 gene                                           | 4930573O21Rik | 114670    | -1.8 | 0.0042252 |
| 1434501_at   | yippee-like 4 (Drosophila)                                           | Ypel4         | 241525    | -1.8 | 8.723E-05 |
| 1418449_at   | ladinin                                                              | Lad1          | 16763     | -1.8 | 0.0067016 |
| 1428936_at   | ATPase, Ca++ transporting, plasma membrane 1                         | Atp2b1        | 67972     | -1.8 | 0.0077869 |
| 1439527_at   | progesterone receptor                                                | Pgr           | 18667     | -1.8 | 0.0011623 |
| 1423892_at   | amyloid beta (A4) precursor protein-binding, family B, member 1      | Apbb1         | 11785     | -1.8 | 0.0042175 |

|              |                                                                    |               |           |      |           |
|--------------|--------------------------------------------------------------------|---------------|-----------|------|-----------|
| 1418102_at   | hairy and enhancer of split 1 (Drosophila)                         | Hes1          | 15205     | -1.8 | 0.0056397 |
| 1428267_at   | DEAH (Asp-Glu-Ala-His) box polypeptide 40                          | Dhx40         | 67487     | -1.8 | 0.0001022 |
| 1422748_at   | zinc finger E-box binding homeobox 2                               | Zeb2          | 24136     | -1.8 | 0.0004008 |
| 1420482_at   | cyclin M3                                                          | Cnm3          | 94218     | -1.8 | 0.0036003 |
| 1425526_a_at | paired related homeobox 1                                          | Prrx1         | 18933     | -1.8 | 0.0061606 |
| 1442800_x_at | family with sequence similarity 181, member B                      | Fam181b       | 58238     | -1.8 | 0.0001649 |
| 1441727_s_at | zinc finger protein 467                                            | Zfp467        | 68910     | -1.8 | 0.0053666 |
| 1455992_at   | vestigial like 4 (Drosophila)                                      | Vgll4         | 232334    | -1.8 | 0.0013749 |
| 1437128_a_at | RIKEN cDNA A630033E08 gene                                         | A630033E08Rik | 240041    | -1.8 | 0.0006664 |
| 1419564_at   | zinc finger protein 467                                            | Zfp467        | 68910     | -1.8 | 0.0063259 |
| 1451019_at   | cathepsin F                                                        | Ctsf          | 56464     | -1.8 | 4.705E-05 |
| 1435499_at   | leucine zipper-EF-hand containing transmembrane protein 2          | Letm2         | 270035    | -1.8 | 0.0003171 |
| 1456420_at   | AT rich interactive domain 4A (RBP1-like)                          | Arid4a        | 238247    | -1.8 | 0.0044439 |
| 1453255_at   | solute carrier family 43, member 1                                 | Slc43a1       | 72401     | -1.8 | 0.0250506 |
| 1448870_at   | latent transforming growth factor beta binding protein 1           | Ltbp1         | 268977    | -1.8 | 0.0002622 |
| 1444632_at   | cDNA sequence BC064078                                             | BC064078      | 408064    | -1.8 | 0.0269677 |
| 1420947_at   | alpha thalassemia/mental retardation syndrome X-linked homolog (h  | Atrx          | 22589     | -1.8 | 0.0087612 |
| 1436325_at   | RAR-related orphan receptor alpha                                  | Rora          | 19883     | -1.8 | 0.0047597 |
| 1426516_a_at | lipin 1                                                            | Lpin1         | 14245     | -1.8 | 0.0196658 |
| 1435553_at   | PDZ domain containing 2                                            | Pdzd2         | 68070     | -1.8 | 0.0001679 |
| 1451348_at   | DEP domain containing 6                                            | Depdc6        | 97998     | -1.8 | 0.0033588 |
| 1424450_at   | G protein-coupled receptor, family C, group 5, member C            | Gprc5c        | 70355     | -1.8 | 0.0059618 |
| 1448005_at   | SAM and SH3 domain containing 1                                    | Sash1         | 70097     | -1.8 | 0.0003601 |
| 1419638_at   | ephrin B2                                                          | Efnb2         | 13642     | -1.8 | 0.0017725 |
| 1441867_x_at | RIKEN cDNA 4930534B04 gene                                         | 4930534B04Rik | 75216     | -1.8 | 0.0068876 |
| 1443485_at   | Eph receptor A7                                                    | Epha7         | 13841     | -1.8 | 0.0118483 |
| 1418288_at   | lipin 1                                                            | Lpin1         | 14245     | -1.8 | 0.0092812 |
| 1418356_at   | mercaptopyruvate sulfurtransferase                                 | Mpst          | 246221    | -1.8 | 0.0014689 |
| 1431220_at   | RIKEN cDNA 2810416G20 gene                                         | 2810416G20Rik | 100040353 | -1.8 | 0.012958  |
| 1417904_at   | DNA cross-link repair 1A, PSO2 homolog (S. cerevisiae)             | Dclre1a       | 55947     | -1.8 | 0.0004045 |
| 1424917_a_at | WD repeat domain, phosphoinositide interacting 1                   | Wipi1         | 52639     | -1.8 | 0.0005849 |
| 1418917_at   | heme binding protein 2                                             | Hebp2         | 56016     | -1.8 | 0.003368  |
| 1427008_at   | ring finger protein 43                                             | Rnf43         | 207742    | -1.8 | 0.0029563 |
| 1424549_at   | degenerative spermatocyte homolog 2 (Drosophila), lipid desaturase | Degs2         | 70059     | -1.8 | 0.0040066 |
| 1458439_a_at | DAZ interacting protein 3, zinc finger                             | Dzip3         | 224170    | -1.8 | 0.0027779 |
| 1419758_at   | ATP-binding cassette, sub-family B (MDR/TAP), member 1A            | Abcb1a        | 18671     | -1.8 | 0.0010936 |
| 1434151_at   | methyltransferase like 7A1                                         | Mettl7a1      | 70152     | -1.8 | 0.0005696 |

|              |                                                                     |               |        |      |           |
|--------------|---------------------------------------------------------------------|---------------|--------|------|-----------|
| 1428895_at   | raftlin family member 2                                             | Rftn2         | 74013  | -1.8 | 0.0006849 |
| 1421065_at   | Janus kinase 2                                                      | Jak2          | 16452  | -1.8 | 0.0041167 |
| 1436458_at   | sema domain, transmembrane domain (TM), and cytoplasmic domain      | Sema6a        | 20358  | -1.8 | 0.000858  |
| 1433687_at   | expressed sequence AI662250                                         | AI662250      | 106639 | -1.8 | 0.0028589 |
| 1428801_at   | mannoside acetylglucosaminyltransferase 3                           | Mgat3         | 17309  | -1.8 | 0.0001037 |
| 1456609_at   | calcium/calmodulin-dependent protein kinase II inhibitor 1          | Camk2n1       | 66259  | -1.8 | 0.0006631 |
| 1426528_at   | neuropilin 2                                                        | Nrp2          | 18187  | -1.8 | 3.414E-06 |
| 1417654_at   | syndecan 4                                                          | Sdc4          | 20971  | -1.8 | 0.0004478 |
| 1449292_at   | RB1-inducible coiled-coil 1                                         | Rb1cc1        | 12421  | -1.8 | 0.0088149 |
| 1416332_at   | cold inducible RNA binding protein                                  | Cirbp         | 12696  | -1.8 | 0.0072672 |
| 1447643_x_at | snail homolog 2 (Drosophila)                                        | Snai2         | 20583  | -1.8 | 0.0071328 |
| 1452982_at   | insulin-like growth factor I receptor                               | Igf1r         | 16001  | -1.8 | 0.0003966 |
| 1455425_at   | expressed sequence BB001228                                         | BB001228      | 103503 | -1.8 | 0.0003747 |
| 1428809_at   | RIKEN cDNA 1810010H24 gene                                          | 1810010H24Rik | 69066  | -1.8 | 0.0030276 |
| 1423375_at   | RIKEN cDNA 1700023B02 gene                                          | 1700023B02Rik | 66935  | -1.8 | 0.0004443 |
| 1416301_a_at | early B-cell factor 1                                               | Ebf1          | 13591  | -1.7 | 0.0034784 |
| 1416101_a_at | histone cluster 1, H1c                                              | Hist1h1c      | 50708  | -1.7 | 0.0019769 |
| 1416419_s_at | gamma-aminobutyric acid (GABA) A receptor-associated protein-like   | Gabarapl1     | 57436  | -1.7 | 0.0004741 |
| 1448551_a_at | tripartite motif-containing 2                                       | Trim2         | 80890  | -1.7 | 0.0016585 |
| 1435829_at   | zinc finger, matrin type 1                                          | Zmat1         | 215693 | -1.7 | 0.0022355 |
| 1427231_at   | roundabout homolog 1 (Drosophila)                                   | Robo1         | 19876  | -1.7 | 0.0023604 |
| 1437473_at   | avian musculoaponeurotic fibrosarcoma (v-maf) AS42 oncogene homolog | Maf           | 17132  | -1.7 | 0.0013456 |
| 1443406_at   | phospholipid scramblase 4                                           | Plscr4        | 235527 | -1.7 | 0.0093679 |
| 1426603_at   | ribonuclease L (2', 5'-oligoadenylate synthetase-dependent)         | Rnasel        | 24014  | -1.7 | 0.0081368 |
| 1429071_at   | malic enzyme 3, NADP(+)-dependent, mitochondrial                    | Me3           | 109264 | -1.7 | 0.0307352 |
| 1446095_at   | antisense Igf2r RNA                                                 | Airn          | 104103 | -1.7 | 0.0031136 |
| 1428701_at   | poliovirus receptor-related 4                                       | Pvrl4         | 71740  | -1.7 | 0.0030298 |
| 1418320_at   | protease, serine, 8 (prostasin)                                     | Prss8         | 76560  | -1.7 | 0.0051894 |
| 1438936_s_at | angiogenin, ribonuclease, RNase A family, 5                         | Ang           | 11727  | -1.7 | 0.0060781 |
| 1437002_at   | family with sequence similarity 73, member A                        | Fam73a        | 215708 | -1.7 | 0.0042946 |
| 1430527_a_at | ring finger protein 167                                             | Rnf167        | 70510  | -1.7 | 0.000594  |
| 1425272_at   | epithelial membrane protein 2                                       | Emp2          | 13731  | -1.7 | 0.0061263 |
| 1438321_x_at | family with sequence similarity 63, member A                        | Fam63a        | 75007  | -1.7 | 0.0008122 |
| 1452946_a_at | raftlin family member 2                                             | Rftn2         | 74013  | -1.7 | 0.002143  |
| 1417174_at   | transmembrane protein 218                                           | Tmem218       | 66279  | -1.7 | 0.0017716 |
| 1439962_at   | RIKEN cDNA 2310010J17 gene                                          | 2310010J17Rik | 78329  | -1.7 | 0.009918  |
| 1437303_at   | interleukin 6 signal transducer                                     | Il6st         | 16195  | -1.7 | 0.0090338 |

|              |                                                                                     |               |        |      |           |
|--------------|-------------------------------------------------------------------------------------|---------------|--------|------|-----------|
| 1452588_at   | zinc finger protein 688                                                             | Zfp688        | 69234  | -1.7 | 0.0036459 |
| 1439503_at   | zinc finger protein 28                                                              | Zfp28         | 22690  | -1.7 | 0.009391  |
| 1416895_at   | ephrin A1                                                                           | Efna1         | 13636  | -1.7 | 0.0026999 |
| 1452890_at   | tubulin tyrosine ligase-like family, member 5                                       | Ttll5         | 320244 | -1.7 | 0.001493  |
| 1429595_at   | RIKEN cDNA 2700049A03 gene                                                          | 2700049A03Rik | 76967  | -1.7 | 0.0039129 |
| 1428967_at   | insulin-like growth factor I receptor                                               | Igf1r         | 16001  | -1.7 | 0.0056559 |
| 1435338_at   | cyclin-dependent kinase 6                                                           | Cdk6          | 12571  | -1.7 | 9.981E-05 |
| 1425558_at   | kinesin light chain 3                                                               | Klc3          | 232943 | -1.7 | 0.0038149 |
| 1449023_a_at | enhancer of zeste homolog 1 (Drosophila)                                            | Ezh1          | 14055  | -1.7 | 9.432E-05 |
| 1438348_x_at | cysteine conjugate-beta lyase 1                                                     | Ccbl1         | 70266  | -1.7 | 0.0022426 |
| 1421142_s_at | forkhead box P1                                                                     | Foxp1         | 108655 | -1.7 | 0.0003923 |
| 1428513_at   | calcium binding and coiled coil domain 1                                            | Calcoco1      | 67488  | -1.7 | 0.0012596 |
| 1438799_at   | Dlx6 opposite strand transcript 1                                                   | Dlx6os1       | 320038 | -1.7 | 0.0047236 |
| 1437462_x_at | matrix metalloproteinase 15                                                         | Mmp15         | 17388  | -1.7 | 0.0166159 |
| 1417392_a_at | solute carrier family 7 (cationic amino acid transporter, y+ system), member 7      | Slc7a7        | 20540  | -1.7 | 0.0001841 |
| 1451529_at   | small glutamine-rich tetratricopeptide repeat (TPR)-containing, beta class member 1 | Sgtb          | 218544 | -1.7 | 0.0067631 |
| 1455031_at   | cell division cycle 2-like 6 (CDK8-like)                                            | Cdc2l6        | 78334  | -1.7 | 0.0006953 |
| 1434374_at   | family with sequence similarity 168, member A                                       | Fam168a       | 319604 | -1.7 | 0.0061009 |
| 1436365_at   | zinc finger and BTB domain containing 7C                                            | Zbtb7c        | 207259 | -1.7 | 0.0022361 |
| 1438255_at   | forkhead box N3                                                                     | Foxn3         | 71375  | -1.7 | 0.008485  |
| 1416488_at   | cyclin G2                                                                           | Ccng2         | 12452  | -1.7 | 8.397E-05 |
| 1452961_at   | RIKEN cDNA 1200009O22 gene                                                          | 1200009O22Rik | 66873  | -1.7 | 0.0020103 |
| 1449813_at   | zinc finger protein 30                                                              | Zfp30         | 22693  | -1.7 | 0.0004875 |
| 1434129_s_at | lipoma HMGIC fusion partner-like 2                                                  | Lhfpl2        | 218454 | -1.7 | 0.0009042 |
| 1438758_at   | acireductone dioxygenase 1                                                          | Adi1          | 104923 | -1.7 | 0.0019914 |
| 1417826_at   | aldo-keto reductase family 1, member E1                                             | Akr1e1        | 56043  | -1.7 | 0.0027237 |
| 1428120_at   | F-box and WD-40 domain protein 9                                                    | Fbxw9         | 68628  | -1.7 | 0.0006894 |
| 1454902_at   | protein kinase C, zeta                                                              | Prkcz         | 18762  | -1.7 | 0.0017483 |
| 1447886_at   | RIKEN cDNA 0610040B09 gene                                                          | 0610040B09Rik | 75395  | -1.7 | 0.0009598 |
| 1423655_a_at | RIKEN cDNA 1500010J02 gene                                                          | 1500010J02Rik | 68964  | -1.7 | 0.0041848 |
| 1440455_at   | calcium/calmodulin-dependent protein kinase II inhibitor 1                          | Camk2n1       | 66259  | -1.7 | 0.0010923 |
| 1429150_at   | coiled-coil domain containing 77                                                    | Ccdc77        | 67200  | -1.7 | 0.0002513 |
| 1436596_at   | H2A histone family, member V                                                        | H2afv         | 77605  | -1.7 | 0.003434  |
| 1416892_s_at | family with sequence similarity 107, member B                                       | Fam107b       | 66540  | -1.7 | 0.0001368 |
| 1455011_at   | StAR-related lipid transfer (START) domain containing 4                             | Stard4        | 170459 | -1.7 | 0.0006946 |
| 1448979_at   | muted                                                                               | Muted         | 17828  | -1.7 | 0.0032391 |
| 1422324_a_at | parathyroid hormone-like peptide                                                    | Pthlh         | 19227  | -1.7 | 0.0008388 |

|              |                                                                            |               |        |      |           |
|--------------|----------------------------------------------------------------------------|---------------|--------|------|-----------|
| 1456351_at   | bromodomain containing 8                                                   | Brd8          | 78656  | -1.7 | 0.0018766 |
| 1427964_at   | CKLF-like MARVEL transmembrane domain containing 8                         | Cmtm8         | 70031  | -1.7 | 0.0034299 |
| 1419773_at   | aprataxin and PNKP like factor                                             | Aplf          | 72103  | -1.7 | 0.0040624 |
| 1428743_at   | Bri3 binding protein                                                       | Bri3bp        | 76809  | -1.7 | 0.0004114 |
| 1437106_at   | lysine (K)-specific demethylase 5A                                         | Kdm5a         | 214899 | -1.7 | 0.0020593 |
| 1437150_at   | family with sequence similarity 110, member B                              | Fam110b       | 242297 | -1.7 | 0.0072595 |
| 1422914_at   | trans-acting transcription factor 5                                        | Sp5           | 64406  | -1.7 | 0.0014638 |
| 1436121_a_at | non-SMC element 1 homolog ( <i>S. cerevisiae</i> )                         | Nsmce1        | 67711  | -1.7 | 0.0002681 |
| 1455558_at   | non-protein coding RNA 153                                                 | Ncrna00153    | 228730 | -1.7 | 0.0005236 |
| 1434783_at   | transmembrane protein 106C                                                 | Tmem106c      | 380967 | -1.7 | 0.0076896 |
| 1435591_at   | expressed sequence AI426330                                                | AI426330      | 101563 | -1.7 | 3.673E-05 |
| 1443867_at   | ankyrin repeat domain 12                                                   | Ankrd12       | 106585 | -1.7 | 0.0030458 |
| 1457682_at   | RIKEN cDNA 9030420J04 gene                                                 | 9030420J04Rik | 71544  | -1.7 | 9.52E-05  |
| 1455799_at   | RAR-related orphan receptor beta                                           | Rorb          | 225998 | -1.7 | 0.0035186 |
| 1451332_at   | zinc finger protein 521                                                    | Zfp521        | 225207 | -1.7 | 0.000104  |
| 1439066_at   | angiopoietin 1                                                             | Angpt1        | 11600  | -1.7 | 0.0050748 |
| 1436994_a_at | histone cluster 1, H1c                                                     | Hist1h1c      | 50708  | -1.7 | 0.0017615 |
| 1423974_at   | nuclear mitotic apparatus protein 1                                        | Numa1         | 101706 | -1.7 | 0.0001811 |
| 1429427_s_at | transcription factor 7-like 2, T-cell specific, HMG-box                    | Tcf7l2        | 21416  | -1.7 | 0.0002242 |
| 1423180_at   | potassium voltage gated channel, Shab-related subfamily, member 1          | Kcnb1         | 16500  | -1.7 | 0.0001921 |
| 1420841_at   | protein tyrosine phosphatase, receptor type, F                             | Ptpnf         | 19268  | -1.7 | 0.0062403 |
| 1421141_a_at | forkhead box P1                                                            | Foxp1         | 108655 | -1.7 | 9.878E-05 |
| 1419356_at   | Kruppel-like factor 7 (ubiquitous)                                         | Klf7          | 93691  | -1.7 | 0.0072292 |
| 1451809_s_at | RWD domain containing 3                                                    | Rwdd3         | 73170  | -1.7 | 0.001833  |
| 1450686_at   | paraoxonase 2                                                              | Pon2          | 330260 | -1.7 | 0.0011944 |
| 1440048_at   | SWI/SNF related, matrix associated, actin dependent regulator of chromatin | Smarca5       | 93762  | -1.7 | 0.0010669 |
| 1449579_at   | Sh3 domain YSC-like 1                                                      | Sh3yl1        | 24057  | -1.7 | 0.0005468 |
| 1455075_at   | phosphatidylinositol glycan anchor biosynthesis, class V                   | Pigv          | 230801 | -1.7 | 0.0010141 |
| 1453102_at   | fibronectin leucine rich transmembrane protein 3                           | Flrt3         | 71436  | -1.7 | 0.0015697 |
| 1443906_at   | CD55 antigen                                                               | Cd55          | 13136  | -1.7 | 0.0015732 |
| 1418440_at   | collagen, type VIII, alpha 1                                               | Col8a1        | 12837  | -1.7 | 0.0039757 |
| 1422904_at   | flavin containing monooxygenase 2                                          | Fmo2          | 55990  | -1.7 | 0.0011428 |
| 1454858_x_at | methyltransferase like 7A1                                                 | Mettl7a1      | 70152  | -1.7 | 0.0002631 |
| 1422982_at   | androgen receptor                                                          | Ar            | 11835  | -1.7 | 0.0060503 |
| 1450355_a_at | capping protein (actin filament), gelsolin-like                            | Capg          | 12332  | -1.7 | 0.0035476 |
| 1427386_at   | Rho guanine nucleotide exchange factor (GEF) 16                            | Arhgef16      | 230972 | -1.7 | 0.0020804 |
| 1421106_at   | jagged 1                                                                   | Jag1          | 16449  | -1.7 | 0.0015436 |

|              |                                                                           |               |           |      |           |
|--------------|---------------------------------------------------------------------------|---------------|-----------|------|-----------|
| 1426047_a_at | protein tyrosine phosphatase, receptor type, R                            | Ptprr         | 19279     | -1.7 | 0.0046828 |
| 1420843_at   | protein tyrosine phosphatase, receptor type, F                            | Ptprf         | 19268     | -1.7 | 0.0012068 |
| 1455627_at   | collagen, type VIII, alpha 1                                              | Col8a1        | 12837     | -1.7 | 0.0136219 |
| 1416844_at   | protein arginine N-methyltransferase 2                                    | Prmt2         | 15468     | -1.7 | 0.0011555 |
| 1429137_at   | RIKEN cDNA 2810422O20 gene                                                | 2810422O20Rik | 69962     | -1.7 | 0.0023633 |
| 1438079_at   | cDNA sequence BC050078                                                    | BC050078      | 237775    | -1.7 | 0.0029091 |
| 1453168_at   | RIKEN cDNA 1700029J07 gene                                                | 1700029J07Rik | 69479     | -1.7 | 0.0075846 |
| 1424850_at   | mitogen-activated protein kinase kinase kinase 1                          | Map3k1        | 26401     | -1.7 | 2.015E-05 |
| 1434277_a_at | yippee-like 2 (Drosophila)                                                | Ypel2         | 77864     | -1.7 | 0.0008177 |
| 1436533_at   | TROVE domain family, member 2                                             | Trove2        | 20822     | -1.7 | 0.0090414 |
| 1417164_at   | dual specificity phosphatase 10                                           | Dusp10        | 63953     | -1.7 | 0.0090382 |
| 1435704_at   | RIKEN cDNA C920006O11 gene                                                | C920006O11Rik | 320295    | -1.7 | 0.0029444 |
| 1415995_at   | caspase 6                                                                 | Casp6         | 12368     | -1.7 | 0.0009937 |
| 1417027_at   | tripartite motif-containing 2                                             | Trim2         | 80890     | -1.7 | 1.74E-06  |
| 1415877_at   | dihydropyrimidinase-like 3                                                | Dpysl3        | 22240     | -1.7 | 0.0016786 |
| 1443932_at   | kelch domain containing 1                                                 | Klhdc1        | 271005    | -1.7 | 0.0012103 |
| 1426539_at   | ubiquitin specific peptidase 11                                           | Usp11         | 236733    | -1.7 | 0.0005629 |
| 1423499_at   | synuclein, alpha interacting protein (synphilin)                          | Sncap         | 67847     | -1.7 | 0.001639  |
| 1429551_at   | RIKEN cDNA 4930579G22 gene                                                | 4930579G22Rik | 69034     | -1.7 | 0.003907  |
| 1422905_s_at | flavin containing monooxygenase 2                                         | Fmo2          | 55990     | -1.7 | 0.0094341 |
| 1416483_at   | tetratricopeptide repeat domain 3                                         | Ttc3          | 22129     | -1.7 | 0.0007555 |
| 1430681_at   | crystallin, lambda 1                                                      | Cryl1         | 68631     | -1.7 | 0.0005674 |
| 1435256_at   | CAP-GLY domain containing linker protein 3                                | Clip3         | 76686     | -1.7 | 0.0010975 |
| 1427465_at   | ATPase, Na <sup>+</sup> /K <sup>+</sup> transporting, alpha 2 polypeptide | Atp1a2        | 98660     | -1.7 | 0.0028674 |
| 1434283_at   | similar to modulator recognition factor 2                                 | LOC100044968  | 100044968 | -1.7 | 0.0008185 |
| 1452269_at   | spectrin beta 3                                                           | Spnb3         | 20743     | -1.7 | 0.0005478 |
| 1428443_a_at | Rap1 GTPase-activating protein                                            | Rap1gap       | 110351    | -1.7 | 0.0106656 |
| 1455316_x_at | cDNA sequence BC094435                                                    | BC094435      | 639390    | -1.7 | 0.0044289 |
| 1438061_at   | RIKEN cDNA 4930523C07 gene                                                | 4930523C07Rik | 67647     | -1.7 | 0.0003686 |
| 1434291_a_at | small EDRK-rich factor 1                                                  | Serf1         | 20365     | -1.7 | 0.0041358 |
| 1452123_s_at | FERM domain containing 4B                                                 | Frmd4b        | 232288    | -1.7 | 0.009669  |
| 1417071_s_at | cytochrome P450, family 4, subfamily v, polypeptide 3                     | Cyp4v3        | 102294    | -1.7 | 0.0068132 |
| 1436827_at   | family with sequence similarity 59, member A                              | Fam59a        | 381126    | -1.7 | 3.046E-05 |
| 1440096_at   | extracellular matrix protein 2, female organ and adipocyte specific       | Ecm2          | 407800    | -1.7 | 0.0007371 |
| 1437234_x_at | protein arginine N-methyltransferase 2                                    | Prmt2         | 15468     | -1.7 | 0.002587  |
| 1439787_at   | purinergic receptor P2X, ligand-gated ion channel, 7                      | P2rx7         | 18439     | -1.7 | 0.0001953 |
| 1434186_at   | lysophosphatidic acid receptor 4                                          | Lpar4         | 78134     | -1.7 | 0.0016845 |

|              |                                                                         |               |        |      |           |
|--------------|-------------------------------------------------------------------------|---------------|--------|------|-----------|
| 1424755_at   | huntingtin interacting protein 1                                        | Hip1          | 215114 | -1.7 | 0.0091062 |
| 1417070_at   | cytochrome P450, family 4, subfamily v, polypeptide 3                   | Cyp4v3        | 102294 | -1.7 | 0.0001363 |
| 1427343_at   | RASD family, member 2                                                   | Rasd2         | 75141  | -1.7 | 0.0091722 |
| 1438231_at   | forkhead box P2                                                         | Foxp2         | 114142 | -1.7 | 0.0124629 |
| 1449839_at   | caspase 3                                                               | Casp3         | 12367  | -1.7 | 0.0040188 |
| 1455533_at   | family with sequence similarity 113, member A                           | Fam113a       | 319513 | -1.7 | 0.0021964 |
| 1452738_at   | stomatin-like 1                                                         | Stoml1        | 69106  | -1.7 | 0.0029351 |
| 1433557_at   | chromobox homolog 7                                                     | Cbx7          | 52609  | -1.7 | 0.0006779 |
| 1427527_a_at | parathyroid hormone-like peptide                                        | Pthlh         | 19227  | -1.7 | 0.007748  |
| 1425043_s_at | RIKEN cDNA 0610037D15 gene                                              | 0610037D15Rik | 68394  | -1.7 | 0.0040143 |
| 1449482_at   | histone cluster 3, H2ba                                                 | Hist3h2ba     | 78303  | -1.7 | 0.0087352 |
| 1436101_at   | ring finger protein 24                                                  | Rnf24         | 51902  | -1.7 | 0.0030305 |
| 1434478_at   | headcase homolog (Drosophila)                                           | Heca          | 380629 | -1.7 | 0.0001209 |
| 1431611_a_at | cell adhesion molecule 1                                                | Cadm1         | 54725  | -1.7 | 0.0066824 |
| 1435236_at   | transcription elongation factor A (SII) N-terminal and central domain c | Tceanc        | 245695 | -1.7 | 0.0132095 |
| 1436989_s_at | solute carrier family 12, member 6                                      | Slc12a6       | 107723 | -1.7 | 6.156E-05 |
| 1437542_at   | IKAROS family zinc finger 2                                             | Ikzf2         | 22779  | -1.7 | 0.0003783 |
| 1455369_at   | amyloid beta (A4) precursor protein binding, family A, member 1         | Apba1         | 319924 | -1.7 | 0.0039909 |
| 1434070_at   | jagged 1                                                                | Jag1          | 16449  | -1.7 | 0.0005887 |
| 1441997_at   | zinc finger protein 184 (Kruppel-like)                                  | Zfp184        | 193452 | -1.7 | 0.0188427 |
| 1454708_at   | actin-binding LIM protein 1                                             | Ablim1        | 226251 | -1.7 | 7.375E-06 |
| 1424133_at   | transmembrane protein 98                                                | Tmem98        | 103743 | -1.7 | 0.0003202 |
| 1440355_at   | potassium channel tetramerisation domain containing 12b                 | Kctd12b       | 207474 | -1.7 | 0.0002674 |
| 1417408_at   | coagulation factor III                                                  | F3            | 14066  | -1.7 | 0.0006925 |
| 1449244_at   | cadherin 2                                                              | Cdh2          | 12558  | -1.7 | 0.0003249 |
| 1425538_x_at | carcinoembryonic antigen-related cell adhesion molecule 1               | Ceacam1       | 26365  | -1.7 | 0.0062657 |
| 1437104_at   | ADP-ribosylation factor guanine nucleotide-exchange factor 1(brefeld    | Arfgef1       | 211673 | -1.7 | 0.0028081 |
| 1435635_at   | protein-L-isoaspartate (D-aspartate) O-methyltransferase domain cor     | Pcmt1         | 319263 | -1.7 | 0.0024618 |
| 1439766_x_at | vascular endothelial growth factor C                                    | Vegfc         | 22341  | -1.7 | 0.0024232 |
| 1416484_at   | tetratricopeptide repeat domain 3                                       | Ttc3          | 22129  | -1.7 | 0.0003595 |
| 1429893_at   | interleukin 17 receptor D                                               | Il17rd        | 171463 | -1.7 | 0.0002928 |
| 1448678_at   | family with sequence similarity 118, member A                           | Fam118a       | 73225  | -1.7 | 0.001829  |
| 1445422_at   | hypothetical protein LOC621549                                          | LOC621549     | 621549 | -1.7 | 0.0006018 |
| 1452309_at   | cingulin-like 1                                                         | Cgnl1         | 68178  | -1.7 | 0.0013079 |
| 1452109_at   | interleukin 17 receptor E                                               | Il17re        | 57890  | -1.7 | 0.0078353 |
| 1420416_at   | sema domain, immunoglobulin domain (Ig), short basic domain, secr       | Sema3a        | 20346  | -1.7 | 0.0020572 |
| 1419853_a_at | purinergic receptor P2X, ligand-gated ion channel, 7                    | P2rx7         | 18439  | -1.7 | 0.0003553 |



|              |                                                                           |               |        |      |           |
|--------------|---------------------------------------------------------------------------|---------------|--------|------|-----------|
| 1437149_at   | solute carrier family 6 (neurotransmitter transporter, taurine), member 6 | Slc6a6        | 21366  | -1.7 | 0.0003666 |
| 1435448_at   | BCL2-like 11 (apoptosis facilitator)                                      | Bcl2l11       | 12125  | -1.7 | 0.0013258 |
| 1454675_at   | thyroid hormone receptor alpha                                            | Thra          | 21833  | -1.6 | 0.0046834 |
| 1422938_at   | B-cell leukemia/lymphoma 2                                                | Bcl2          | 12043  | -1.6 | 0.0005252 |
| 1455049_at   | immunoglobulin superfamily, member 3                                      | Igsf3         | 78908  | -1.6 | 0.0030763 |
| 1441878_s_at | RIKEN cDNA 1810049H13 gene                                                | 1810049H13Rik | 66431  | -1.6 | 0.0072387 |
| 1423825_at   | G protein-coupled receptor 177                                            | Gpr177        | 68151  | -1.6 | 0.0016943 |
| 1420842_at   | protein tyrosine phosphatase, receptor type, F                            | Ptpnf         | 19268  | -1.6 | 0.0012411 |
| 1449626_s_at | acyl-Coenzyme A binding domain containing 4                               | Acbd4         | 67131  | -1.6 | 0.001149  |
| 1439477_at   | ubiquitin-conjugating enzyme E2B, RAD6 homology (S. cerevisiae)           | Ube2b         | 22210  | -1.6 | 0.0025185 |
| 1453286_at   | plexin A2                                                                 | Plxna2        | 18845  | -1.6 | 0.0014145 |
| 1440928_at   | RIKEN cDNA D630037F22 gene                                                | D630037F22Rik | 544696 | -1.6 | 0.005711  |
| 1420539_a_at | chordin-like 2                                                            | Chrdl2        | 69121  | -1.6 | 0.0077268 |
| 1422438_at   | epoxide hydrolase 1, microsomal                                           | Ephx1         | 13849  | -1.6 | 0.0017378 |
| 1439108_at   | myeloid/lymphoid or mixed-lineage leukemia 5                              | Mll5          | 69188  | -1.6 | 0.0094682 |
| 1439259_x_at | abhydrolase domain containing 4                                           | Abhd4         | 105501 | -1.6 | 0.0002994 |
| 1434997_at   | cell division cycle 2-like 6 (CDK8-like)                                  | Cdc2l6        | 78334  | -1.6 | 0.0047448 |
| 1419905_s_at | hydroxyprostaglandin dehydrogenase 15 (NAD)                               | Hpgd          | 15446  | -1.6 | 0.0021007 |
| 1429588_at   | RIKEN cDNA 2810474O19 gene                                                | 2810474O19Rik | 67246  | -1.6 | 0.0016948 |
| 1454901_at   | yippee-like 2 (Drosophila)                                                | Ypel2         | 77864  | -1.6 | 0.0009883 |
| 1435577_at   | disabled homolog 1 (Drosophila)                                           | Dab1          | 13131  | -1.6 | 0.0026471 |
| 1452308_a_at | ATPase, Na <sup>+</sup> /K <sup>+</sup> transporting, alpha 2 polypeptide | Atp1a2        | 98660  | -1.6 | 0.0063811 |
| 1429212_a_at | leucine rich repeat containing 51                                         | Lrrc51        | 69358  | -1.6 | 0.0073785 |
| 1418162_at   | toll-like receptor 4                                                      | Tlr4          | 21898  | -1.6 | 0.0067126 |
| 1456786_at   | LIM domain binding 2                                                      | Ldb2          | 16826  | -1.6 | 0.0070924 |
| 1418968_at   | RB1-inducible coiled-coil 1                                               | Rb1cc1        | 12421  | -1.6 | 0.0066457 |
| 1422912_at   | bone morphogenetic protein 4                                              | Bmp4          | 12159  | -1.6 | 0.0021835 |
| 1451431_a_at | dysbindin (dystrobrevin binding protein 1) domain containing 2            | Dbnidd2       | 52840  | -1.6 | 0.0004305 |
| 1449510_at   | zinc finger protein 467                                                   | Zfp467        | 68910  | -1.6 | 0.0003986 |
| 1451303_at   | cDNA sequence BC002230                                                    | BC002230      | 217827 | -1.6 | 0.0023118 |
| 1455551_at   | UEV and lactate/malate dehydrogenase domains                              | Uevld         | 54122  | -1.6 | 0.0088565 |
| 1424857_a_at | tripartite motif-containing 34                                            | Trim34        | 94094  | -1.6 | 0.0002235 |
| 1431057_a_at | protease, serine, 23                                                      | Prss23        | 76453  | -1.6 | 0.0089474 |
| 1460444_at   | arrestin, beta 1                                                          | Arrb1         | 109689 | -1.6 | 0.0014943 |
| 1437442_at   | Protocadherin 7 (Pcdh7), transcript variant 2, mRNA                       | Pcdh7         | 54216  | -1.6 | 0.0013877 |
| 1434853_x_at | makorin, ring finger protein, 1                                           | Mkrn1         | 54484  | -1.6 | 0.0001363 |
| 1435106_at   | LIM and calponin homology domains 1                                       | Limch1        | 77569  | -1.6 | 0.0011044 |

|              |                                                                           |               |        |      |           |
|--------------|---------------------------------------------------------------------------|---------------|--------|------|-----------|
| 1436983_at   | CREB binding protein                                                      | Crebbp        | 12914  | -1.6 | 0.000404  |
| 1425702_a_at | ectonucleotide pyrophosphatase/phosphodiesterase 5                        | Enpp5         | 83965  | -1.6 | 0.0007667 |
| 1453053_at   | RIKEN cDNA 2610036L11 gene                                                | 2610036L11Rik | 66311  | -1.6 | 0.0026527 |
| 1418673_at   | snail homolog 2 (Drosophila)                                              | Snai2         | 20583  | -1.6 | 0.0071431 |
| 1437127_at   | RIKEN cDNA A630033E08 gene (A630033E08Rik), transcript variant            | A630033E08Rik | 240041 | -1.6 | 0.0001138 |
| 1455646_at   | RIKEN cDNA 2010004M13 gene                                                | 2010004M13Rik | 76511  | -1.6 | 0.0061909 |
| 1451505_at   | coiled-coil-helix-coiled-coil-helix domain containing 5                   | Chchd5        | 66170  | -1.6 | 0.0062505 |
| 1448169_at   | keratin 18                                                                | Krt18         | 16668  | -1.6 | 0.0023235 |
| 1415996_at   | thioredoxin interacting protein                                           | Txnip         | 56338  | -1.6 | 0.0017581 |
| 1449770_x_at | transmembrane protein 191C                                                | Tmem191c      | 224019 | -1.6 | 0.0049094 |
| 1455467_at   | RIKEN cDNA C330043M08 gene                                                | C330043M08Rik | 330323 | -1.6 | 0.0007626 |
| 1426152_a_at | kit ligand                                                                | Kitl          | 17311  | -1.6 | 0.0047475 |
| 1426997_at   | thyroid hormone receptor alpha                                            | Thra          | 21833  | -1.6 | 9.071E-06 |
| 1439109_at   | coiled-coil domain containing 68                                          | Ccdc68        | 381175 | -1.6 | 0.0091544 |
| 1416795_at   | crystallin, lambda 1                                                      | Cryl1         | 68631  | -1.6 | 0.0097949 |
| 1443790_x_at | RIKEN cDNA 4930414L22 gene                                                | 4930414L22Rik | 78108  | -1.6 | 0.0037412 |
| 1439805_at   | Nuclear factor of activated T-cells 5 (Nfat5), transcript variant a, mRNA | Nfat5         | 54446  | -1.6 | 0.0024583 |
| 1436137_at   | solute carrier family 6 (neurotransmitter transporter), member 17         | Slc6a17       | 229706 | -1.6 | 0.0003449 |
| 1417994_a_at | amiloride-sensitive cation channel 1, neuronal (degenerin)                | Accn1         | 11418  | -1.6 | 0.0087276 |
| 1418671_at   | calpain 5                                                                 | Capn5         | 12337  | -1.6 | 0.0026253 |
| 1422025_at   | microphthalmia-associated transcription factor                            | Mitf          | 17342  | -1.6 | 0.0090484 |
| 1424988_at   | myosin regulatory light chain interacting protein                         | Myliip        | 218203 | -1.6 | 0.0011504 |
| 1426743_at   | adaptor protein, phosphotyrosine interaction, PH domain and leucine       | Appl2         | 216190 | -1.6 | 0.0003689 |
| 1426604_at   | ribonuclease L (2', 5'-oligoadenylate synthetase-dependent)               | Rnasel        | 24014  | -1.6 | 0.0003773 |
| 1455214_at   | microphthalmia-associated transcription factor                            | Mitf          | 17342  | -1.6 | 0.0039428 |
| 1438294_at   | ataxin 1                                                                  | Atxn1         | 20238  | -1.6 | 0.0035808 |
| 1415743_at   | histone deacetylase 5                                                     | Hdac5         | 15184  | -1.6 | 0.0020137 |
| 1417661_at   | RAD52 motif 1                                                             | Rdm1          | 66599  | -1.6 | 0.0038397 |
| 1430436_at   | family with sequence similarity 115, member A                             | Fam115a       | 77574  | -1.6 | 0.0018012 |
| 1419256_at   | spectrin beta 2                                                           | Spnb2         | 20742  | -1.6 | 0.0026312 |
| 1451326_at   | abhydrolase domain containing 14b                                         | Abhd14b       | 76491  | -1.6 | 0.0002171 |
| 1423413_at   | N-myc downstream regulated gene 1                                         | Ndrp1         | 17988  | -1.6 | 0.0132372 |
| 1434045_at   | cyclin-dependent kinase inhibitor 1B                                      | Cdkn1b        | 12576  | -1.6 | 0.001795  |
| 1448510_at   | ephrin A1                                                                 | Efna1         | 13636  | -1.6 | 0.0038816 |
| 1423104_at   | insulin receptor substrate 1                                              | Irs1          | 16367  | -1.6 | 0.0293134 |
| 1424826_s_at | metastasis suppressor 1                                                   | Mtss1         | 211401 | -1.6 | 0.0001122 |
| 1427879_at   | RIKEN cDNA 1810031K17 gene                                                | 1810031K17Rik | 69171  | -1.6 | 0.0019236 |

|              |                                                                                  |               |              |      |           |
|--------------|----------------------------------------------------------------------------------|---------------|--------------|------|-----------|
| 1424250_a_at | Rho guanine nucleotide exchange factor (GEF) 3                                   | Arhgef3       | 71704        | -1.6 | 0.0014612 |
| 1434470_at   | synaptotagmin XIII                                                               | Syt13         | 80976        | -1.6 | 0.0068299 |
| 1455927_x_at | Non-SMC element 1 homolog ( <i>S. cerevisiae</i> ), mRNA (cDNA clone M           | Nsmce1        | 67711        | -1.6 | 0.0009311 |
| 1451629_at   | limb-bud and heart                                                               | Lbh           | 77889        | -1.6 | 0.0065387 |
| 1418400_at   | La ribonucleoprotein domain family, member 6                                     | Larp6         | 67557        | -1.6 | 0.0074111 |
| 1437208_at   | septin 10                                                                        |               | 40066 103080 | -1.6 | 0.0017292 |
| 1435258_at   | transmembrane protein 141                                                        | Tmem141       | 51875        | -1.6 | 0.0025843 |
| 1437152_at   | mex3 homolog B ( <i>C. elegans</i> )                                             | Mex3b         | 108797       | -1.6 | 0.0022801 |
| 1434642_at   | hydroxysteroid (17-beta) dehydrogenase 11                                        | Hsd17b11      | 114664       | -1.6 | 0.0003435 |
| 1438789_s_at | dihydropyrimidinase-like 3                                                       | Dpysl3        | 22240        | -1.6 | 0.0012245 |
| 1429399_at   | ring finger protein 125                                                          | Rnf125        | 67664        | -1.6 | 8.144E-06 |
| 1433626_at   | phospholipid scramblase 4                                                        | Plscr4        | 235527       | -1.6 | 0.0011189 |
| 1416654_at   | solute carrier family 31, member 2                                               | Slc31a2       | 20530        | -1.6 | 0.0016835 |
| 1449614_s_at | expressed sequence AI314976                                                      | AI314976      | 106821       | -1.6 | 0.0003036 |
| 1439971_at   | RIKEN cDNA 6330439K17 gene                                                       | 6330439K17Rik | 241688       | -1.6 | 0.0039506 |
| 1427239_at   | intraflagellar transport 122 homolog ( <i>Chlamydomonas</i> )                    | Ift122        | 81896        | -1.6 | 2.474E-05 |
| 1429281_at   | RIKEN cDNA 2610008E11 gene                                                       | 2610008E11Rik | 72128        | -1.6 | 0.0001785 |
| 1434311_at   | CCR4-NOT transcription complex, subunit 6-like                                   | Cnot6l        | 231464       | -1.6 | 0.0046757 |
| 1422838_at   | potassium channel, subfamily U, member 1                                         | Kcnu1         | 16532        | -1.6 | 0.0042464 |
| 1448117_at   | kit ligand                                                                       | Kitl          | 17311        | -1.6 | 0.0021882 |
| 1417892_a_at | sirtuin 3 (silent mating type information regulation 2, homolog) 3 ( <i>S. c</i> | Sirt3         | 64384        | -1.6 | 0.0060983 |
| 1452889_at   | RIKEN cDNA 2310007H09 gene                                                       | 2310007H09Rik | 76429        | -1.6 | 0.0005315 |
| 1429229_s_at | RIKEN cDNA 4930534B04 gene                                                       | 4930534B04Rik | 75216        | -1.6 | 0.0005799 |
| 1426810_at   | lysine (K)-specific demethylase 3A                                               | Kdm3a         | 104263       | -1.6 | 0.0001458 |
| 1441165_s_at | calsyntenin 2                                                                    | Clstn2        | 64085        | -1.6 | 0.0073702 |
| 1426331_a_at | FERM domain containing 4B                                                        | Frm4b         | 232288       | -1.6 | 0.010345  |
| 1439180_at   | INO80 complex subunit D                                                          | Ino80d        | 227195       | -1.6 | 0.0020553 |
| 1438724_at   | oxysterol binding protein-like 3                                                 | Osbpl3        | 71720        | -1.6 | 0.0092397 |
| 1427371_at   | ATP-binding cassette, sub-family A (ABC1), member 8a                             | Abca8a        | 217258       | -1.6 | 0.0001499 |
| 1419124_at   | major facilitator superfamily domain containing 6                                | Mfsd6         | 98682        | -1.6 | 0.0016468 |
| 1422574_at   | Max dimerization protein 4                                                       | Mxd4          | 17122        | -1.6 | 2.656E-05 |
| 1431279_s_at | tubulin tyrosine ligase-like family, member 5                                    | Ttll5         | 320244       | -1.6 | 0.0011563 |
| 1453290_at   | HMG box domain containing 4                                                      | Hmgxb4        | 70823        | -1.6 | 0.0022323 |
| 1418434_at   | makorin, ring finger protein, 1                                                  | Mkrn1         | 54484        | -1.6 | 0.0014568 |
| 1451539_at   | BAI1-associated protein 2-like 1                                                 | Baiap2l1      | 66898        | -1.6 | 0.0032797 |
| 1454832_at   | phosphatase and actin regulator 1                                                | Phacr1        | 218194       | -1.6 | 0.0041225 |
| 1440215_at   | predicted gene, OTTMUSG00000004461                                               | OTTMUSG0000   | 208820       | -1.6 | 0.0122654 |

|              |                                                                           |                    |           |      |           |
|--------------|---------------------------------------------------------------------------|--------------------|-----------|------|-----------|
| 1454200_at   | zinc finger E-box binding homeobox 2                                      | Zeb2               | 24136     | -1.6 | 0.0031369 |
| 1417568_at   | neurocalcin delta                                                         | Ncald              | 52589     | -1.6 | 0.009346  |
| 1454837_at   | ceroid-lipofuscinosis, neuronal 6                                         | Cln6               | 76524     | -1.6 | 0.0029698 |
| 1427410_at   | deleted in lymphocytic leukemia, 2                                        | Dleu2              | 328425    | -1.6 | 0.0040713 |
| 1451126_at   | MAF1 homolog (S. cerevisiae)                                              | Maf1               | 68877     | -1.6 | 0.000724  |
| 1429413_at   | carboxypeptidase M                                                        | Cpm                | 70574     | -1.6 | 0.0160658 |
| 1436357_at   | predicted gene, ENSMUSG00000072593                                        | ENSMUSG00000072593 | 100191074 | -1.6 | 0.0001175 |
| 1427680_a_at | nuclear factor I/B                                                        | Nfib               | 18028     | -1.6 | 0.0020806 |
| 1429308_at   | PR domain containing 16                                                   | Prdm16             | 70673     | -1.6 | 0.0171288 |
| 1426969_at   | tripartite motif-containing 23                                            | Trim23             | 81003     | -1.6 | 0.00113   |
| 1443823_s_at | ATPase, Na <sup>+</sup> /K <sup>+</sup> transporting, alpha 2 polypeptide | Atp1a2             | 98660     | -1.6 | 0.0044568 |
| 1424999_at   | RIKEN cDNA 1700022C21 gene                                                | 1700022C21Rik      | 76416     | -1.6 | 0.0233187 |
| 1429448_s_at | tet oncogene 1                                                            | Tet1               | 52463     | -1.6 | 0.0070252 |
| 1433972_at   | calmodulin binding transcription activator 1                              | Camta1             | 100072    | -1.6 | 0.0011514 |
| 1451196_at   | yippee-like 5 (Drosophila)                                                | Ypel5              | 383295    | -1.6 | 0.0023041 |
| 1426951_at   | cysteine rich transmembrane BMP regulator 1 (chordin like)                | Crim1              | 50766     | -1.6 | 0.005194  |
| 1435870_at   | choline phosphotransferase 1                                              | Chpt1              | 212862    | -1.6 | 0.0023864 |
| 1456746_a_at | CD99 antigen-like 2                                                       | Cd99l2             | 171486    | -1.6 | 0.0066897 |
| 1436870_s_at | actin filament associated protein 1-like 2                                | Afap1l2            | 226250    | -1.6 | 0.0019677 |
| 1439557_s_at | LIM domain binding 2                                                      | Ldb2               | 16826     | -1.6 | 0.0006577 |
| 1429260_at   | RIKEN cDNA 1810014B01 gene                                                | 1810014B01Rik      | 66263     | -1.6 | 0.0025323 |
| 1426594_at   | FERM domain containing 4B                                                 | Frm4b              | 232288    | -1.6 | 0.0011977 |
| 1434809_at   | Rho GTPase activating protein 28                                          | Arhgap28           | 268970    | -1.6 | 0.0010984 |
| 1455436_at   | DIRAS family, GTP-binding RAS-like 2                                      | Diras2             | 68203     | -1.6 | 0.006764  |
| 1434193_at   | predicted gene, OTTMUSG00000009332                                        | OTTMUSG00000009332 | 100039968 | -1.6 | 0.0034069 |
| 1433837_at   | RIKEN cDNA 8430408G22 gene                                                | 8430408G22Rik      | 213393    | -1.6 | 0.0069598 |
| 1426808_at   | lectin, galactose binding, soluble 3                                      | Lgals3             | 16854     | -1.6 | 0.0460498 |
| 1436584_at   | sprouty homolog 2 (Drosophila)                                            | Spry2              | 24064     | -1.6 | 0.0037734 |
| 1434631_at   | DNA segment, Chr 3, ERATO Doi 751, expressed                              | D3Ert751e          | 73852     | -1.6 | 0.0092798 |
| 1437122_at   | B-cell leukemia/lymphoma 2                                                | Bcl2               | 12043     | -1.6 | 0.0038153 |
| 1435336_at   | cadherin, EGF LAG seven-pass G-type receptor 2 (flamingo homolog)         | Celsr2             | 53883     | -1.6 | 0.0313009 |
| 1422185_a_at | cytochrome b5 reductase 3                                                 | Cyb5r3             | 109754    | -1.6 | 0.0006952 |
| 1439397_at   | formin 1                                                                  | Fmn1               | 14260     | -1.6 | 0.0148012 |
| 1451153_a_at | cysteine and histidine rich 1                                             | Cyhr1              | 54151     | -1.6 | 0.0058094 |
| 1433593_at   | yippee-like 5 (Drosophila)                                                | Ypel5              | 383295    | -1.6 | 0.001909  |
| 1425201_a_at | hydroxypyruvate isomerase homolog (E. coli)                               | Hyi                | 68180     | -1.6 | 0.0019631 |
| 1422738_at   | discoidin domain receptor family, member 2                                | Ddr2               | 18214     | -1.6 | 0.008884  |

|              |                                                                           |               |        |      |           |
|--------------|---------------------------------------------------------------------------|---------------|--------|------|-----------|
| 1420019_at   | Tetraspanin 8 (Tspan8), mRNA                                              | Tspan8        | 216350 | -1.6 | 0.0005442 |
| 1437046_x_at | family with sequence similarity 63, member A                              | Fam63a        | 75007  | -1.6 | 1.376E-05 |
| 1435549_at   | transient receptor potential cation channel, subfamily M, member 4        | Trpm4         | 68667  | -1.6 | 0.0001397 |
| 1423765_at   | ATH1, acid trehalase-like 1 (yeast)                                       | Ath1          | 212974 | -1.6 | 0.0009201 |
| 1428565_at   | unkempt-like (Drosophila)                                                 | Unkl          | 74154  | -1.6 | 0.0004836 |
| 1436560_at   | kinesin family member 3A                                                  | Kif3a         | 16568  | -1.6 | 0.0036235 |
| 1421009_at   | radical S-adenosyl methionine domain containing 2                         | Rsad2         | 58185  | -1.6 | 0.0044488 |
| 1434893_at   | ATPase, Na <sup>+</sup> /K <sup>+</sup> transporting, alpha 2 polypeptide | Atp1a2        | 98660  | -1.6 | 0.0007442 |
| 1450410_a_at | solute carrier family 48 (heme transporter), member 1                     | Slc48a1       | 67739  | -1.6 | 0.000678  |
| 1416978_at   | Fc receptor, IgG, alpha chain transporter                                 | Fcgrt         | 14132  | -1.6 | 0.0020423 |
| 1424463_at   | major facilitator superfamily domain containing 6                         | Mfsd6         | 98682  | -1.6 | 0.0008982 |
| 1449271_a_at | heme binding protein 2                                                    | Hebp2         | 56016  | -1.6 | 0.0034581 |
| 1418172_at   | heme binding protein 1                                                    | Hebp1         | 15199  | -1.6 | 0.0015895 |
| 1456089_at   | tripartite motif-containing 23                                            | Trim23        | 81003  | -1.6 | 0.0195019 |
| 1453011_at   | 3-hydroxybutyrate dehydrogenase, type 2                                   | Bdh2          | 69772  | -1.6 | 0.0012835 |
| 1436426_at   | coiled-coil and C2 domain containing 2A                                   | Cc2d2a        | 231214 | -1.6 | 0.0037238 |
| 1430554_at   | leucine-rich repeats and immunoglobulin-like domains 3                    | Lrig3         | 320398 | -1.6 | 0.0008843 |
| 1418419_at   | F-box and leucine-rich repeat protein 20                                  | Fbxl20        | 72194  | -1.6 | 1.954E-05 |
| 1433653_at   | family with sequence similarity 20, member A                              | Fam20a        | 208659 | -1.6 | 0.027206  |
| 1448288_at   | nuclear factor I/B                                                        | Nfib          | 18028  | -1.6 | 0.0009758 |
| 1431130_at   | RIKEN cDNA 2010110P09 gene                                                | 2010110P09Rik | 70261  | -1.6 | 0.004903  |
| 1455743_at   | olfactomedin-like 2A                                                      | Olfml2a       | 241327 | -1.6 | 0.0012064 |
| 1437271_at   | cardiotrophin-like cytokine factor 1                                      | Clcf1         | 56708  | -1.6 | 0.0004319 |
| 1426655_a_at | family with sequence similarity 63, member A                              | Fam63a        | 75007  | -1.6 | 0.0019304 |
| 1455712_at   | histone cluster 3, H2a                                                    | Hist3h2a      | 319162 | -1.6 | 0.0001586 |
| 1457632_s_at | Meis homeobox 2                                                           | Meis2         | 17536  | -1.6 | 0.0006144 |
| 1449481_at   | solute carrier family 25 (mitochondrial carrier, adenine nucleotide tran  | Slc25a13      | 50799  | -1.6 | 0.0055191 |
| 1421101_a_at | LIM domain binding 2                                                      | Ldb2          | 16826  | -1.6 | 0.0005285 |
| 1451848_a_at | crystallin, zeta                                                          | Cryz          | 12972  | -1.6 | 0.0098497 |
| 1428352_at   | arrestin domain containing 2                                              | Arrdc2        | 70807  | -1.6 | 0.0032935 |
| 1422532_at   | xeroderma pigmentosum, complementation group C                            | Xpc           | 22591  | -1.6 | 0.0019843 |
| 1460234_at   | WD repeat domain 81                                                       | Wdr81         | 192652 | -1.6 | 0.000279  |
| 1424919_at   | v-erb-b2 erythroblastic leukemia viral oncogene homolog 2, neuro/gli      | ErbB2         | 13866  | -1.6 | 0.0013826 |
| 1452618_at   | CDK5 regulatory subunit associated protein 2                              | Cdk5rap2      | 214444 | -1.6 | 0.015372  |
| 1417108_at   | kinesin light chain 4                                                     | Klc4          | 74764  | -1.6 | 0.0002706 |
| 1449273_at   | cytoplasmic FMR1 interacting protein 2                                    | Cyfi2         | 76884  | -1.6 | 0.0097157 |
| 1424464_s_at | major facilitator superfamily domain containing 6                         | Mfsd6         | 98682  | -1.6 | 0.0079082 |

|              |                                                                                |               |        |      |           |
|--------------|--------------------------------------------------------------------------------|---------------|--------|------|-----------|
| 1448410_at   | ubiquitination factor E4B, UFD2 homolog ( <i>S. cerevisiae</i> )               | Ube4b         | 63958  | -1.6 | 0.0004614 |
| 1434133_s_at | WD repeat domain 42A                                                           | Wdr42a        | 98193  | -1.6 | 0.004853  |
| 1419509_a_at | N-acetylglucosamine kinase                                                     | Nagk          | 56174  | -1.6 | 3.252E-05 |
| 1455204_at   | phosphatidylinositol transfer protein, cytoplasmic 1                           | Pitpnc1       | 71795  | -1.6 | 0.0041064 |
| 1427201_at   | musculoskeletal, embryonic nuclear protein 1                                   | Mustn1        | 66175  | -1.6 | 0.0068092 |
| 1429240_at   | StAR-related lipid transfer (START) domain containing 4                        | Stard4        | 170459 | -1.6 | 0.001247  |
| 1425914_a_at | armadillo repeat containing, X-linked 1                                        | Armcx1        | 78248  | -1.6 | 0.0011402 |
| 1430309_at   | Nipped-B homolog ( <i>Drosophila</i> )                                         | Nipbl         | 71175  | -1.6 | 0.0005893 |
| 1449490_at   | methyl-CpG binding domain protein 4                                            | Mbd4          | 17193  | -1.6 | 0.00152   |
| 1426766_at   | RIKEN cDNA 6330403K07 gene                                                     | 6330403K07Rik | 103712 | -1.6 | 0.0031642 |
| 1439665_at   | lysophosphatidic acid receptor 4                                               | Lpar4         | 78134  | -1.6 | 0.0089631 |
| 1436054_at   | RIKEN cDNA 9130227C08Rik gene                                                  | 9130227C08Rik | 219094 | -1.6 | 0.0008857 |
| 1426478_at   | RAS p21 protein activator 1                                                    | Rasa1         | 218397 | -1.6 | 0.0003853 |
| 1424886_at   | protein tyrosine phosphatase, receptor type, D                                 | Ptprd         | 19266  | -1.6 | 0.0003277 |
| 1425108_a_at | cDNA sequence BC004728                                                         | BC004728      | 207818 | -1.6 | 0.0048412 |
| 1429367_at   | WD repeat domain, phosphoinositide interacting 2                               | Wipi2         | 74781  | -1.5 | 0.0044659 |
| 1436805_at   | ubiquitin associated and SH3 domain containing, B                              | Ubash3b       | 72828  | -1.5 | 0.0007183 |
| 1423726_at   | vesicle amine transport protein 1 homolog ( <i>T. californica</i> )            | Vat1          | 26949  | -1.5 | 0.0006608 |
| 1435461_at   | membrane associated guanylate kinase, WW and PDZ domain containing             | Magi3         | 99470  | -1.5 | 0.0003747 |
| 1423432_at   | pleckstrin homology domain interacting protein                                 | Phip          | 83946  | -1.5 | 0.0005385 |
| 1416689_at   | tuftelin 1                                                                     | Tuft1         | 22156  | -1.5 | 0.0032778 |
| 1426656_at   | family with sequence similarity 63, member A                                   | Fam63a        | 75007  | -1.5 | 0.0005791 |
| 1428922_at   | RIKEN cDNA 1200009O22 gene                                                     | 1200009O22Rik | 66873  | -1.5 | 0.0008004 |
| 1449951_at   | nuclear factor of kappa light polypeptide gene enhancer in B-cells inhibitor 1 | Nfkbil1       | 18038  | -1.5 | 0.0014476 |
| 1435794_at   | cDNA sequence BC050254                                                         | BC050254      | 269630 | -1.5 | 0.006006  |
| 1447819_x_at | collagen, type VIII, alpha 1                                                   | Col8a1        | 12837  | -1.5 | 0.0137176 |
| 1441259_s_at | intraflagellar transport 122 homolog ( <i>Chlamydomonas</i> )                  | Ift122        | 81896  | -1.5 | 0.0018315 |
| 1451121_a_at | glioma tumor suppressor candidate region gene 2                                | Gltscr2       | 68077  | -1.5 | 0.0063278 |
| 1454973_at   | activating transcription factor 7 interacting protein                          | Atf7ip        | 54343  | -1.5 | 0.000492  |
| 1420046_s_at | MAF1 homolog ( <i>S. cerevisiae</i> )                                          | Maf1          | 68877  | -1.5 | 0.0004152 |
| 1455169_at   | RAB11 family interacting protein 2 (class I)                                   | Rab11fip2     | 74998  | -1.5 | 0.0021165 |
| 1435930_at   | S phase cyclin A-associated protein in the ER                                  | Scaper        | 244891 | -1.5 | 0.001797  |
| 1434796_at   | vesicle-associated membrane protein 4                                          | Vamp4         | 53330  | -1.5 | 0.0002225 |
| 1434007_at   | glycosyltransferase-like 1B                                                    | Gylt1b        | 228366 | -1.5 | 0.0055987 |
| 1423062_at   | insulin-like growth factor binding protein 3                                   | Igfbp3        | 16009  | -1.5 | 0.0099361 |
| 1428834_at   | dual specificity phosphatase 4                                                 | Dusp4         | 319520 | -1.5 | 0.0338208 |
| 1447547_at   | latent transforming growth factor beta binding protein 1                       | Ltbp1         | 268977 | -1.5 | 0.0077943 |

|              |                                                                      |              |        |      |           |
|--------------|----------------------------------------------------------------------|--------------|--------|------|-----------|
| 1459054_at   | castor homolog 1, zinc finger (Drosophila)                           | Casz1        | 69743  | -1.5 | 0.0052083 |
| 1427369_at   | NLR family, pyrin domain containing 6                                | Nlrp6        | 101613 | -1.5 | 0.0030681 |
| 1446990_at   | nuclear factor I/A                                                   | Nfia         | 18027  | -1.5 | 0.007475  |
| 1439264_x_at | LIM and SH3 protein 1                                                | Lasp1        | 16796  | -1.5 | 0.0007262 |
| 1416121_at   | lysyl oxidase                                                        | Lox          | 16948  | -1.5 | 0.0429093 |
| 1458882_at   | serine (or cysteine) peptidase inhibitor, clade B, member 8          | Serpinb8     | 20725  | -1.5 | 0.0340349 |
| 1429432_at   | BAT2 domain containing 1                                             | Bat2d        | 226562 | -1.5 | 0.0059924 |
| 1451323_at   | zinc finger protein 7                                                | Zfp7         | 223669 | -1.5 | 0.0012101 |
| 1437205_at   | transcription factor 25 (basic helix-loop-helix)                     | Tcf25        | 66855  | -1.5 | 0.007931  |
| 1448361_at   | tetratricopeptide repeat domain 3                                    | Ttc3         | 22129  | -1.5 | 0.0001314 |
| 1417843_s_at | EPS8-like 2                                                          | Eps8l2       | 98845  | -1.5 | 0.0014924 |
| 1418293_at   | interferon-induced protein with tetratricopeptide repeats 2          | Ifit2        | 15958  | -1.5 | 0.0091097 |
| 1426545_at   | trinucleotide repeat containing 6b                                   | Tnrc6b       | 213988 | -1.5 | 0.0001529 |
| 1449270_at   | plexin domain containing 2                                           | Plxdc2       | 67448  | -1.5 | 0.0070508 |
| 1457635_s_at | nuclear receptor subfamily 3, group C, member 1                      | Nr3c1        | 14815  | -1.5 | 0.0070058 |
| 1417649_at   | cyclin-dependent kinase inhibitor 1C (P57)                           | Cdkn1c       | 12577  | -1.5 | 0.0082501 |
| 1436447_at   | RIKEN cDNA A630026N12 gene                                           | A630026N12Ri | 320961 | -1.5 | 0.0097916 |
| 1423312_at   | trophoblast glycoprotein                                             | Tpbg         | 21983  | -1.5 | 0.0127558 |
| 1436117_at   | RIKEN cDNA A830010M20 gene                                           | A830010M20Ri | 231570 | -1.5 | 0.0016487 |
| 1420760_s_at | N-myc downstream regulated gene 1                                    | Ndrg1        | 17988  | -1.5 | 0.0379851 |
| 1429264_at   | RIKEN cDNA C030044B11 gene                                           | C030044B11Ri | 68128  | -1.5 | 0.0003077 |
| 1427143_at   | lysine (K)-specific demethylase 5B                                   | Kdm5b        | 75605  | -1.5 | 0.0012467 |
| 1448165_at   | caspase 2                                                            | Casp2        | 12366  | -1.5 | 0.0035795 |
| 1424112_at   | insulin-like growth factor 2 receptor                                | Igf2r        | 16004  | -1.5 | 0.0010903 |
| 1425979_a_at | Fas (TNFRSF6) binding factor 1                                       | Fbf1         | 217335 | -1.5 | 0.0011996 |
| 1420795_at   | fibroblast growth factor 9                                           | Fgf9         | 14180  | -1.5 | 0.0038801 |
| 1433489_s_at | fibroblast growth factor receptor 2                                  | Fgfr2        | 14183  | -1.5 | 0.0094117 |
| 1421317_x_at | myeloblastosis oncogene                                              | Myb          | 17863  | -1.5 | 0.0090892 |
| 1460728_s_at | inhibitor of growth family, member 4                                 | Ing4         | 28019  | -1.5 | 0.000842  |
| 1417644_at   | sarcospan                                                            | Sspn         | 16651  | -1.5 | 0.00029   |
| 1435084_at   | RIKEN cDNA C730049O14 gene                                           | C730049O14Ri | 320117 | -1.5 | 0.0023866 |
| 1455342_at   | RIKEN cDNA A230083H22 gene                                           | A230083H22Ri | 353211 | -1.5 | 0.002978  |
| 1433971_at   | calmodulin binding transcription activator 1                         | Camta1       | 100072 | -1.5 | 0.0169026 |
| 1448465_at   | 4-nitrophenylphosphatase domain and non-neuronal SNAP25-like protein | Nipsnap1     | 18082  | -1.5 | 0.001067  |
| 1460003_at   | expressed sequence AI956758                                          | AI956758     | 99132  | -1.5 | 0.0013292 |
| 1421276_a_at | dystonin                                                             | Dst          | 13518  | -1.5 | 0.0005444 |
| 1450881_s_at | G protein-coupled receptor 137B                                      | Gpr137b      | 83924  | -1.5 | 0.0078742 |

|              |                                                                      |               |        |      |           |
|--------------|----------------------------------------------------------------------|---------------|--------|------|-----------|
| 1452127_a_at | protein tyrosine phosphatase, non-receptor type 13                   | Ptpn13        | 19249  | -1.5 | 0.0022095 |
| 1435153_at   | BTB (POZ) domain containing 6                                        | Btbd6         | 399566 | -1.5 | 0.0035417 |
| 1438432_at   | leucyl/cystinyl aminopeptidase                                       | Lnpep         | 240028 | -1.5 | 0.0016123 |
| 1424478_at   | Bardet-Biedl syndrome 2 (human)                                      | Bbs2          | 67378  | -1.5 | 0.0001835 |
| 1430614_at   | RIKEN cDNA 4632415K11 gene                                           | 4632415K11Rik | 74347  | -1.5 | 0.0001172 |
| 1435866_s_at | histone cluster 3, H2a                                               | Hist3h2a      | 319162 | -1.5 | 0.0045948 |
| 1421064_at   | membrane protein, palmitoylated 5 (MAGUK p55 subfamily member        | Mpp5          | 56217  | -1.5 | 0.0095291 |
| 1438169_a_at | FERM domain containing 4B                                            | Frmd4b        | 232288 | -1.5 | 0.0055959 |
| 1433695_at   | cannabinoid receptor interacting protein 1                           | Cnrip1        | 380686 | -1.5 | 0.0095194 |
| 1455144_s_at | expressed sequence AU040829                                          | AU040829      | 216831 | -1.5 | 0.0024361 |
| 1428417_at   | family with sequence similarity 164, member A                        | Fam164a       | 67306  | -1.5 | 0.0005104 |
| 1427070_at   | sorting nexin family member 21                                       | Snx21         | 101113 | -1.5 | 0.0091726 |
| 1417420_at   | cyclin D1                                                            | Ccnd1         | 12443  | -1.5 | 0.001407  |
| 1443891_at   | RAD51-like 3 ( <i>S. cerevisiae</i> )                                | Rad51l3       | 19364  | -1.5 | 0.0018202 |
| 1454834_at   | nuclear factor I/B                                                   | Nfib          | 18028  | -1.5 | 0.0010827 |
| 1422747_at   | CHK2 checkpoint homolog ( <i>S. pombe</i> )                          | Chek2         | 50883  | -1.5 | 0.0020394 |
| 1444207_at   | Alstrom syndrome 1 homolog (human) ( <i>Alms1</i> ), mRNA            | Alms1         | 236266 | -1.5 | 0.0056263 |
| 1416981_at   | forkhead box O1                                                      | Foxo1         | 56458  | -1.5 | 0.0002206 |
| 1446560_at   | protease, serine, 23                                                 | Prss23        | 76453  | -1.5 | 0.0178111 |
| 1435787_at   | protein phosphatase 1 (formerly 2C)-like                             | Ppm1l         | 242083 | -1.5 | 0.0082936 |
| 1418862_at   | enoyl Coenzyme A hydratase domain containing 3                       | Echdc3        | 67856  | -1.5 | 0.0094054 |
| 1428509_at   | myosin IE                                                            | Myo1e         | 71602  | -1.5 | 0.0007078 |
| 1434206_s_at | protein phosphatase 2, regulatory subunit B (B56), gamma isoform     | Ppp2r5c       | 26931  | -1.5 | 0.0066631 |
| 1437650_at   | hypothetical protein C730026J16                                      | C730026J16    | 331006 | -1.5 | 0.0047094 |
| 1451634_at   | RIKEN cDNA 2810051F02 gene                                           | 2810051F02Rik | 72704  | -1.5 | 0.0001056 |
| 1422607_at   | ets variant gene 1                                                   | Etv1          | 14009  | -1.5 | 0.0053318 |
| 1416424_at   | mannose-6-phosphate receptor binding protein 1                       | M6prbp1       | 66905  | -1.5 | 0.0005222 |
| 1438985_x_at | OTU domain containing 5                                              | Otud5         | 54644  | -1.5 | 0.0022468 |
| 1415736_at   | prefoldin 5                                                          | Pfdn5         | 56612  | -1.5 | 0.0063328 |
| 1448293_at   | early B-cell factor 1                                                | Ebf1          | 13591  | -1.5 | 0.000927  |
| 1452333_at   | SWI/SNF related, matrix associated, actin dependent regulator of chr | Smarca2       | 67155  | -1.5 | 0.0030456 |
| 1455549_at   | SEC14 and spectrin domains 1                                         | Sestd1        | 228071 | -1.5 | 1.443E-05 |
| 1459813_at   | RIKEN cDNA 1700012D01 gene                                           | 1700012D01Rik | 72243  | -1.5 | 0.0001896 |
| 1454685_at   | G protein-coupled receptor 146                                       | Gpr146        | 80290  | -1.5 | 0.0088925 |
| 1450717_at   | angiogenin, ribonuclease, RNase A family, 5                          | Ang           | 11727  | -1.5 | 0.0349616 |
| 1425615_a_at | phosphoenolpyruvate carboxykinase 2 (mitochondrial)                  | Pck2          | 74551  | -1.5 | 0.0020536 |
| 1440870_at   | PR domain containing 16                                              | Prdm16        | 70673  | -1.5 | 0.0067672 |



|              |                                                              |               |        |      |           |
|--------------|--------------------------------------------------------------|---------------|--------|------|-----------|
| 1439150_x_at | GH regulated TBC protein 1                                   | Grtp1         | 66790  | -1.5 | 0.0154778 |
| 1453009_at   | carboxypeptidase M                                           | Cpm           | 70574  | -1.5 | 0.0059074 |
| 1456779_a_at | RIKEN cDNA 4930414L22 gene                                   | 4930414L22Rik | 78108  | -1.5 | 0.0081336 |
| 1429339_a_at | acyl-Coenzyme A dehydrogenase family, member 10              | Acad10        | 71985  | -1.5 | 0.0089739 |
| 1417129_a_at | Meis homeobox 2                                              | Meis2         | 17536  | -1.5 | 0.0020703 |
| 1430516_at   | RIKEN cDNA 4930428B01 gene                                   | 4930428B01Rik | 73854  | -1.5 | 0.0037687 |
| 1436195_at   | cDNA sequence BC046404                                       | BC046404      | 192976 | -1.5 | 0.0004099 |
| 1447500_at   | cut-like homeobox 2                                          | Cux2          | 13048  | -1.5 | 0.0073582 |
| 1435595_at   | RIKEN cDNA 1810011O10 gene                                   | 1810011O10Rik | 69068  | -1.5 | 0.0011938 |
| 1437270_a_at | cardiotrophin-like cytokine factor 1                         | Clcf1         | 56708  | -1.5 | 0.00214   |
| 1435974_at   | CDC42 guanine nucleotide exchange factor (GEF) 9             | Arhgef9       | 236915 | -1.5 | 0.000268  |
| 1436181_at   | development and differentiation enhancing factor 2           | Ddef2         | 211914 | -1.5 | 0.0098828 |
| 1429066_at   | RIKEN cDNA 4930565B19 gene                                   | 4930565B19Rik | 75325  | -1.5 | 0.000302  |
| 1434036_at   | metastasis suppressor 1                                      | Mtss1         | 211401 | -1.5 | 1.221E-05 |
| 1438910_a_at | stomatin                                                     | Stom          | 13830  | -1.5 | 0.0048243 |
| 1427604_a_at | ATPase, class II, type 9A                                    | Atp9a         | 11981  | -1.5 | 0.0045787 |
| 1416195_at   | inositol polyphosphate 5-phosphatase K                       | Inpp5k        | 19062  | -1.5 | 0.0041416 |
| 1429202_at   | RIKEN cDNA 2610019N06 gene                                   | 2610019N06Rik | 66299  | -1.5 | 0.0034299 |
| 1452885_at   | splicing factor, arginine/serine-rich 2, interacting protein | Sfrs2ip       | 72193  | -1.5 | 0.0010579 |
| 1429052_at   | protein tyrosine phosphatase, receptor type, D               | Ptprd         | 19266  | -1.5 | 0.0011033 |
| 1454613_at   | dihydropyrimidinase-like 3                                   | Dpysl3        | 22240  | -1.5 | 0.0048355 |
| 1421854_at   | fibrinogen-like protein 2                                    | Fgl2          | 14190  | -1.5 | 0.0033398 |
| 1424220_a_at | porcupine homolog (Drosophila)                               | Porcn         | 53627  | -1.5 | 0.006957  |
| 1434339_at   | formin binding protein 1-like                                | Fnbp1l        | 214459 | -1.5 | 0.0003632 |
| 1455287_at   | cyclin-dependent kinase 6                                    | Cdk6          | 12571  | -1.5 | 0.0063816 |
| 1420425_at   | PR domain containing 1, with ZNF domain                      | Prdm1         | 12142  | -1.5 | 0.0036064 |
| 1456225_x_at | tribbles homolog 3 (Drosophila)                              | Trib3         | 228775 | -1.5 | 0.038141  |
| 1416539_at   | sialic acid acetyltransferase                                | Siae          | 22619  | -1.5 | 0.0426913 |
| 1419309_at   | podoplanin                                                   | Pdpn          | 14726  | -1.5 | 0.0077088 |
| 1420679_a_at | androgen-induced 1                                           | Aig1          | 66253  | -1.5 | 0.001944  |
| 1438633_x_at | LIM and SH3 protein 1                                        | Lasp1         | 16796  | -1.5 | 0.0003781 |
| 1420649_at   | zinc finger homeobox 3                                       | Zfhx3         | 11906  | -1.5 | 9.403E-05 |
| 1436982_at   | trinucleotide repeat containing 6b                           | Tnrc6b        | 213988 | -1.5 | 0.000232  |
| 1417039_a_at | cullin 7                                                     | Cul7          | 66515  | -1.5 | 0.0055685 |
| 1430555_s_at | leucine-rich repeats and immunoglobulin-like domains 3       | Lrig3         | 320398 | -1.5 | 0.0044115 |
| 1416538_at   | sialic acid acetyltransferase                                | Siae          | 22619  | -1.5 | 0.0001226 |
| 1448634_at   | ralA binding protein 1                                       | Ralbp1        | 19765  | -1.5 | 0.0004186 |

|              |                                                                   |               |        |      |           |
|--------------|-------------------------------------------------------------------|---------------|--------|------|-----------|
| 1451687_a_at | HNF1 homeobox B                                                   | Hnf1b         | 21410  | -1.5 | 0.0062058 |
| 1424111_at   | insulin-like growth factor 2 receptor                             | Igf2r         | 16004  | -1.5 | 0.000608  |
| 1442061_at   | BTB (POZ) domain containing 7, mRNA (cDNA clone MGC:66540 IM      | Btbd7         | 238386 | -1.5 | 0.0367551 |
| 1416619_at   | RIKEN cDNA 4632428N05 gene                                        | 4632428N05Rik | 74048  | -1.5 | 0.0066386 |
| 1434675_at   | zinc finger protein 763                                           | Zfp763        | 73451  | -1.5 | 0.0194178 |
| 1450435_at   | L1 cell adhesion molecule                                         | L1cam         | 16728  | -1.5 | 0.0456895 |
| 1415932_x_at | ATPase, class II, type 9A                                         | Atp9a         | 11981  | -1.5 | 8.696E-05 |
| 1451479_a_at | transmembrane protein 53                                          | Tmem53        | 68777  | -1.5 | 0.0026593 |
| 1426880_at   | enhancer trap locus 4                                             | Etl4          | 208618 | -1.5 | 0.0017367 |
| 1429019_s_at | paraoxonase 2                                                     | Pon2          | 330260 | -1.5 | 0.0041188 |
| 1420132_s_at | CDNA fis, clone TRACH2005004,moderately similar to SURFACE G      | Pttg1ip       | 108705 | -1.5 | 0.0165188 |
| 1456174_x_at | N-myc downstream regulated gene 1                                 | Ndrp1         | 17988  | -1.5 | 0.019772  |
| 1450771_at   | fucosyltransferase 9                                              | Fut9          | 14348  | -1.5 | 0.0481469 |
| 1437360_at   | protocadherin 19                                                  | Pcdh19        | 279653 | -1.5 | 0.0010592 |
| 1415758_at   | furry homolog-like (Drosophila)                                   | Fryl          | 72313  | -1.5 | 0.0002323 |
| 1433836_a_at | RIKEN cDNA 8430408G22 gene                                        | 8430408G22Rik | 213393 | -1.5 | 0.0308136 |
| 1449402_at   | carbohydrate (N-acetylglucosamino) sulfotransferase 7             | Chst7         | 60322  | -1.5 | 0.0002483 |
| 1438305_at   | regulating synaptic membrane exocytosis 1                         | Rims1         | 116837 | -1.5 | 0.0165341 |
| 1439788_at   | coiled-coil domain containing 111                                 | Ccdc111       | 408022 | -1.5 | 0.0025578 |
| 1456378_s_at | F-box and leucine-rich repeat protein 20                          | Fbxl20        | 72194  | -1.5 | 2.443E-05 |
| 1434943_at   | MORN repeat containing 4                                          | Morn4         | 226123 | -1.5 | 0.0009646 |
| 1417535_at   | F-box protein 25                                                  | Fbxo25        | 66822  | -1.5 | 0.0126165 |
| 1421943_at   | transforming growth factor alpha                                  | Tgfa          | 21802  | -1.5 | 0.0004965 |
| 1448415_a_at | sema domain, immunoglobulin domain (Ig), short basic domain, secr | Sema3b        | 20347  | -1.5 | 0.0265835 |
| 1416953_at   | connective tissue growth factor                                   | Ctgf          | 14219  | -1.5 | 0.0197098 |
| 1418163_at   | toll-like receptor 4                                              | Tlr4          | 21898  | -1.5 | 0.0101763 |
| 1450976_at   | N-myc downstream regulated gene 1                                 | Ndrp1         | 17988  | -1.5 | 0.0108828 |

| <b>SUPPLEMENTAL TABLE 3: List Of Genes Upregulated By P4 That Are Dependent On SRC-2</b> |                                                              |                    |                  |                    |                |
|------------------------------------------------------------------------------------------|--------------------------------------------------------------|--------------------|------------------|--------------------|----------------|
| <b>Probe set</b>                                                                         | <b>Gene Title</b>                                            | <b>Gene Symbol</b> | <b>Entrez ID</b> | <b>Fold change</b> | <b>p value</b> |
| 1444176_at                                                                               | ATPase, H+ transporting, lysosomal V0 subunit D2             | Atp6v0d2           | 242341           | -7.9               | 0.00096685     |
| 1456509_at                                                                               | RIKEN cDNA 1110032F04 gene                                   | 1110032F04Rik      | 68725            | -6.5               | 0.00015196     |
| 1434798_at                                                                               | ATPase, H+ transporting, lysosomal V0 subunit D2             | Atp6v0d2           | 242341           | -6.3               | 0.00013694     |
| 1421134_at                                                                               | amphiregulin                                                 | Areg               | 11839            | -5.3               | 0.00206937     |
| 1434458_at                                                                               | follistatin                                                  | Fst                | 14313            | -4.7               | 0.01025412     |
| 1419430_at                                                                               | cytochrome P450, family 26, subfamily a, polypeptide 1       | Cyp26a1            | 13082            | -4.4               | 0.00144659     |
| 1422177_at                                                                               | interleukin 13 receptor, alpha 2                             | Il13ra2            | 16165            | -3.3               | 0.00464522     |
| 1417231_at                                                                               | claudin 2                                                    | Cldn2              | 12738            | -3.2               | 0.0044433      |
| 1455913_x                                                                                | transthyretin                                                | Ttr                | 22139            | -2.9               | 0.00202424     |
| 1454608_x                                                                                | transthyretin                                                | Ttr                | 22139            | -2.8               | 0.00177001     |
| 1435234_at                                                                               | nuclear receptor coactivator 2                               | Ncoa2              | 17978            | -2.8               | 0.00017791     |
| 1453486_a                                                                                | signal peptide, CUB domain, EGF-like 2                       | Scube2             | 56788            | -2.5               | 0.00659789     |
| 1459737_s                                                                                | transthyretin                                                | Ttr                | 22139            | -2.4               | 0.00626089     |
| 1419195_at                                                                               | WAP four-disulfide core domain 15B                           | Wfdc15b            | 192201           | -2.4               | 0.00166999     |
| 1429013_at                                                                               | MAP7 domain containing 2                                     | Mtap7d2            | 78283            | -2.3               | 0.00033656     |
| 1416125_at                                                                               | FK506 binding protein 5                                      | Fkbp5              | 14229            | -2.3               | 0.00076274     |
| 1451580_a                                                                                | transthyretin                                                | Ttr                | 22139            | -2.2               | 0.00407171     |
| 1419491_at                                                                               | defensin beta 1                                              | Defb1              | 13214            | -2.2               | 0.04513233     |
| 1439795_at                                                                               | G protein-coupled receptor 64                                | Gpr64              | 237175           | -2.1               | 6.3613E-05     |
| 1421103_at                                                                               | BMP2 inducible kinase                                        | Bmp2k              | 140780           | -2.0               | 0.00174092     |
| 1437419_at                                                                               | BMP2 inducible kinase                                        | Bmp2k              | 140780           | -2.0               | 0.00469976     |
| 1438796_at                                                                               | nuclear receptor subfamily 4, group A, member 3              | Nr4a3              | 18124            | -2.0               | 0.00552334     |
| 1460555_at                                                                               | family with sequence similarity 65, member B                 | Fam65b             | 193385           | -2.0               | 0.01389412     |
| 1451895_a                                                                                | 24-dehydrocholesterol reductase                              | Dhcr24             | 74754            | -1.9               | 0.00327478     |
| 1418158_at                                                                               | transformation related protein 63                            | Trp63              | 22061            | -1.9               | 0.03949712     |
| 1429216_at                                                                               | progesterone and adipoQ receptor family member III           | Paqr3              | 231474           | -1.9               | 0.00103778     |
| 1433902_at                                                                               | kelch repeat and BTB (POZ) domain containing 8               | Kbtbd8             | 243574           | -1.9               | 0.00397408     |
| 1452490_a                                                                                | adaptor protein complex AP-2, alpha 2 subunit                | Ap2a2              | 11772            | -1.8               | 0.00166424     |
| 1460012_at                                                                               | WAP four-disulfide core domain 3                             | Wfdc3              | 71856            | -1.8               | 0.00085883     |
| 1416129_at                                                                               | ERBB receptor feedback inhibitor 1                           | Errfi1             | 74155            | -1.8               | 0.0367374      |
| 1449475_at                                                                               | ATPase, H+/K+ transporting, nongastric, alpha polypeptide    | Atp12a             | 192113           | -1.8               | 0.00583362     |
| 1421078_at                                                                               | transcription factor 23                                      | Tcf23              | 69852            | -1.8               | 0.01366596     |
| 1452013_at                                                                               | ATPase, class V, type 10A                                    | Atp10a             | 11982            | -1.8               | 0.00369995     |
| 1416761_at                                                                               | hydroxysteroid 11-beta dehydrogenase 2                       | Hsd11b2            | 15484            | -1.8               | 0.0028894      |
| 1423611_at                                                                               | alkaline phosphatase, liver/bone/kidney                      | Alpl               | 11647            | -1.8               | 0.02112812     |
| 1431315_at                                                                               | hydroletharus syndrome 1                                     | Hyls1              | 76832            | -1.8               | 0.00022287     |
| 1450855_at                                                                               | armadillo repeat gene deleted in velo-cardio-facial syndrome | Arvcf              | 11877            | -1.7               | 0.00736415     |
| 1450005_x                                                                                | delta-like 2 homolog (Drosophila)                            | Dlk2               | 106565           | -1.7               | 0.02842304     |
| 1418030_at                                                                               | solute carrier organic anion transporter family, member 3a1  | Slco3a1            | 108116           | -1.7               | 0.00132212     |

|            |                                                                                |           |        |      |            |
|------------|--------------------------------------------------------------------------------|-----------|--------|------|------------|
| 1417089_a  | creatine kinase, mitochondrial 1, ubiquitous                                   | Ckmt1     | 12716  | -1.7 | 0.0055818  |
| 1424529_s  | cell growth regulator with EF hand domain 1                                    | Cgref1    | 68567  | -1.7 | 0.01268911 |
| 1455366_at | mitochondrial ribosomal protein L52                                            | Mrpl52    | 68836  | -1.7 | 0.00366444 |
| 1421037_at | neuronal PAS domain protein 2                                                  | Npas2     | 18143  | -1.7 | 0.00065409 |
| 1418572_x  | tumor necrosis factor receptor superfamily, member 12a                         | Tnfrsf12a | 27279  | -1.7 | 0.01023714 |
| 1434537_at | solute carrier organic anion transporter family, member 3a1                    | Slco3a1   | 108116 | -1.7 | 0.00022652 |
| 1436321_at | UDP-GlcNAc:betaGal beta-1,3-N-acetylglucosaminyltransferase 7                  | B3gnt7    | 227327 | -1.7 | 0.00568998 |
| 1452652_at | transmembrane protein 158                                                      | Tmem158   | 72309  | -1.7 | 0.01604057 |
| 1419276_at | ectonucleotide pyrophosphatase/phosphodiesterase 1                             | Enpp1     | 18605  | -1.7 | 0.00154679 |
| 1449342_at | protein tyrosine phosphatase-like (proline instead of catalytic arginine), mem | Ptp1b     | 70757  | -1.7 | 0.00064612 |
| 1424211_at | solute carrier family 25, member 33                                            | Slc25a33  | 70556  | -1.7 | 0.00031991 |
| 1447272_s  | ATPase, class V, type 10A                                                      | Atp10a    | 11982  | -1.7 | 0.00132163 |
| 1452160_at | TCDD-inducible poly(ADP-ribose) polymerase                                     | Tiparp    | 99929  | -1.7 | 0.00529328 |
| 1449233_at | basic helix-loop-helix family, member a15                                      | Bhlha15   | 17341  | -1.6 | 0.02036724 |
| 1421113_at | pepsinogen 5, group I                                                          | Pga5      | 58803  | -1.6 | 0.00012327 |
| 1434188_at | solute carrier family 16 (monocarboxylic acid transporters), member 12         | Slc16a12  | 240638 | -1.6 | 0.00023822 |
| 1450728_at | four jointed box 1 (Drosophila)                                                | Fjx1      | 14221  | -1.6 | 0.00342889 |
| 1450852_s  | coagulation factor II (thrombin) receptor                                      | F2r       | 14062  | -1.6 | 0.01881149 |
| 1450389_s  | phosphatidylinositol-4-phosphate 5-kinase, type 1 beta                         | Pip5k1b   | 18719  | -1.6 | 0.00273877 |
| 1430596_s  | vestigial like 3 (Drosophila)                                                  | Vgll3     | 73569  | -1.6 | 0.00700435 |
| 1419254_at | methylenetetrahydrofolate dehydrogenase (NAD+ dependent), methenyltetra        | Mthfd2    | 17768  | -1.6 | 0.0018245  |
| 1455898_x  | solute carrier family 2 (facilitated glucose transporter), member 3            | Slc2a3    | 20527  | -1.6 | 0.00186112 |
| 1434096_at | solute carrier family 4 (anion exchanger), member 4                            | Slc4a4    | 54403  | -1.6 | 0.00854917 |
| 1419253_at | methylenetetrahydrofolate dehydrogenase (NAD+ dependent), methenyltetra        | Mthfd2    | 17768  | -1.6 | 0.0356176  |
| 1416316_at | solute carrier family 27 (fatty acid transporter), member 2                    | Slc27a2   | 26458  | -1.6 | 0.00539508 |
| 1418571_at | tumor necrosis factor receptor superfamily, member 12a                         | Tnfrsf12a | 27279  | -1.6 | 0.00930514 |
| 1434239_at | ribosomal RNA processing 12 homolog (S. cerevisiae)                            | Rrp12     | 107094 | -1.6 | 0.00016582 |
| 1435115_at | fibronectin type III domain containing 5                                       | Fndc5     | 384061 | -1.6 | 0.03062951 |
| 1432418_a  | creatine kinase, mitochondrial 1, ubiquitous                                   | Ckmt1     | 12716  | -1.6 | 0.00461391 |
| 1456003_a  | solute carrier family 1 (glutamate/neutral amino acid transporter), member 4   | Slc1a4    | 55963  | -1.6 | 0.02033819 |
| 1437329_at | protein tyrosine phosphatase-like (proline instead of catalytic arginine), mem | Ptp1b     | 70757  | -1.6 | 0.00738024 |
| 1420503_at | solute carrier family 6 (neurotransmitter transporter), member 14              | Slc6a14   | 56774  | -1.6 | 0.04121934 |
| 1451095_at | asparagine synthetase                                                          | Asns      | 27053  | -1.6 | 0.00086445 |
| 1447475_at | gene model 967, (NCBI)                                                         | Gm967     | 381217 | -1.6 | 0.00438952 |
| 1449091_at | claudin 8                                                                      | Cldn8     | 54420  | -1.6 | 0.00053762 |
| 1448918_at | solute carrier organic anion transporter family, member 3a1                    | Slco3a1   | 108116 | -1.6 | 0.00238623 |
| 1419874_x  | zinc finger and BTB domain containing 16                                       | Zbtb16    | 235320 | -1.6 | 0.01015406 |
| 1437914_at | E2F transcription factor 6                                                     | E2f6      | 50496  | -1.5 | 0.01594553 |
| 1451776_s  | HOP homeobox                                                                   | Hopx      | 74318  | -1.5 | 0.02435488 |
| 1433966_x  | asparagine synthetase                                                          | Asns      | 27053  | -1.5 | 0.00196954 |
| 1453135_at | fibronectin type III domain containing 5                                       | Fndc5     | 384061 | -1.5 | 0.00643116 |

|            |                                                                                              |               |        |      |            |
|------------|----------------------------------------------------------------------------------------------|---------------|--------|------|------------|
| 1436120_at | SET domain, bifurcated 2                                                                     | Setdb2        | 239122 | -1.5 | 0.00350429 |
| 1433894_at | JAZF zinc finger 1                                                                           | Jazf1         | 231986 | -1.5 | 0.00176561 |
| 1437052_s  | solute carrier family 2 (facilitated glucose transporter), member 3                          | Slc2a3        | 20527  | -1.5 | 0.00546348 |
| 1449592_at | transcription factor 15                                                                      | Tcf15         | 21407  | -1.5 | 0.00963535 |
| 1431705_a  | mucolipin 2                                                                                  | Mcoln2        | 68279  | -1.5 | 0.00267575 |
| 1455667_at | prolactin regulatory element binding                                                         | Preb          | 50907  | -1.5 | 0.03049212 |
| 1435367_at | mitogen-activated protein kinase 4                                                           | Mapk4         | 225724 | -1.5 | 0.00241983 |
| 1426721_s  | TCDD-inducible poly(ADP-ribose) polymerase                                                   | Tiparp        | 99929  | -1.5 | 0.00021012 |
| 1420504_at | solute carrier family 6 (neurotransmitter transporter), member 14                            | Slc6a14       | 56774  | -1.5 | 0.00528085 |
| 1449461_at | retinol binding protein 7, cellular                                                          | Rbp7          | 63954  | -1.5 | 0.01105444 |
| 1419519_at | insulin-like growth factor 1                                                                 | Igf1          | 16000  | -1.5 | 0.03398146 |
| 1423061_at | armadillo repeat gene deleted in velo-cardio-facial syndrome                                 | Arvcf         | 11877  | -1.5 | 0.00205181 |
| 1435302_at | TAF4B RNA polymerase II, TATA box binding protein (TBP)-associated factor 4                  | Taf4b         | 72504  | -1.5 | 0.00103202 |
| 1448231_at | FK506 binding protein 5                                                                      | Fkbp5         | 14229  | -1.5 | 0.01586167 |
| 1437308_s  | coagulation factor II (thrombin) receptor                                                    | F2r           | 14062  | -1.5 | 0.0439962  |
| 1426410_at | pyruvate dehydrogenase kinase, isoenzyme 3                                                   | Pdk3          | 236900 | -1.5 | 0.00046738 |
| 1435695_a  | gamma-glutamyl cyclotransferase                                                              | Ggct          | 110175 | -1.5 | 0.00065431 |
| 1452352_at | cytotoxic T lymphocyte-associated protein 2 beta                                             | Ctla2b        | 13025  | -1.5 | 0.03902845 |
| 1450017_at | cyclin G1                                                                                    | Ccng1         | 12450  | -1.5 | 0.0116237  |
| 1421260_a  | spermidine synthase                                                                          | Srm           | 20810  | -1.5 | 0.00194088 |
| 1423621_a  | solute carrier family 33 (acetyl-CoA transporter), member 1                                  | Slc33a1       | 11416  | -1.5 | 0.00295415 |
| 1455657_at | SMG1 homolog, phosphatidylinositol 3-kinase-related kinase (C. elegans)                      | Smg1          | 233789 | -1.5 | 0.0048968  |
| 1439036_a  | ATPase, Na <sup>+</sup> /K <sup>+</sup> transporting, beta 1 polypeptide                     | Atp1b1        | 11931  | -1.5 | 0.0036896  |
| 1434411_at | collagen, type XII, alpha 1                                                                  | Col12a1       | 12816  | -1.5 | 0.01189868 |
| 1438725_at | mediator complex subunit 13                                                                  | Med13         | 327987 | -1.5 | 0.03625713 |
| 1428839_at | WD repeat domain 53                                                                          | Wdr53         | 68980  | -1.5 | 0.03995653 |
| 1418453_a  | ATPase, Na <sup>+</sup> /K <sup>+</sup> transporting, beta 1 polypeptide                     | Atp1b1        | 11931  | -1.4 | 0.00851085 |
| 1419288_at | junction adhesion molecule 2                                                                 | Jam2          | 67374  | -1.4 | 0.01673037 |
| 1456981_at | transmembrane channel-like gene family 7                                                     | Tmc7          | 209760 | -1.4 | 0.04391874 |
| 1440116_at | RIKEN cDNA D630045J12 gene                                                                   | D630045J12Rik | 330286 | -1.4 | 0.01532479 |
| 1423890_x  | ATPase, Na <sup>+</sup> /K <sup>+</sup> transporting, beta 1 polypeptide                     | Atp1b1        | 11931  | -1.4 | 0.00255822 |
| 1438300_at | CDKN2A interacting protein                                                                   | Cdkn2aip      | 70925  | -1.4 | 0.01002648 |
| 1430352_at | a disintegrin-like and metalloproteinase (reprolysin type) with thrombospondin type 1 motifs | Adamts9       | 101401 | -1.4 | 0.02413255 |
| 1417094_at | acyl-CoA thioesterase 7                                                                      | Acot7         | 70025  | -1.4 | 0.00327835 |
| 1427347_s  | tubulin, beta 2A                                                                             | Tubb2a        | 22151  | -1.4 | 0.01150519 |
| 1447851_x  | ATPase, class V, type 10A                                                                    | Atp10a        | 11982  | -1.4 | 0.00024604 |
| 1451339_at | sulfite oxidase                                                                              | Suox          | 211389 | -1.4 | 0.02473852 |
| 1426658_x  | 3-phosphoglycerate dehydrogenase                                                             | Phgdh         | 236539 | -1.4 | 0.00111787 |
| 1417675_a  | midasin homolog (yeast)                                                                      | Mdn1          | 100019 | -1.4 | 0.00105013 |
| 1438818_at | NMD3 homolog (S. cerevisiae)                                                                 | Nmd3          | 97112  | -1.4 | 0.0111141  |
| 1451293_at | RRP9, small subunit (SSU) processome component, homolog (yeast)                              | Rrp9          | 27966  | -1.4 | 0.01127671 |

|            |                                                                                                |               |        |      |            |
|------------|------------------------------------------------------------------------------------------------|---------------|--------|------|------------|
| 1415917_at | methylenetetrahydrofolate dehydrogenase (NADP+ dependent), methenyltetrahydrofolate synthetase | Mthfd1        | 108156 | -1.4 | 0.00119579 |
| 1427097_at | WW domain containing E3 ubiquitin protein ligase 1                                             | Wwp1          | 107568 | -1.4 | 0.01654629 |
| 1433502_s  | TSR1, 20S rRNA accumulation, homolog (yeast)                                                   | Tsr1          | 104662 | -1.4 | 0.001537   |
| 1451152_a  | ATPase, Na+/K+ transporting, beta 1 polypeptide                                                | Atp1b1        | 11931  | -1.4 | 0.00399731 |
| 1433567_at | guanine monophosphate synthetase                                                               | Gmps          | 229363 | -1.4 | 0.00172505 |
| 1433907_at | Pbx/knotted 1 homeobox 2                                                                       | Pknox2        | 208076 | -1.4 | 0.0024623  |
| 1435057_x  | polymerase (RNA) I polypeptide E                                                               | Polr1e        | 64424  | -1.4 | 0.00504247 |
| 1435282_at | gene model 967, (NCBI)                                                                         | Gm967         | 381217 | -1.4 | 0.00768489 |
| 1450627_at | progressive ankylosis                                                                          | Ank           | 11732  | -1.4 | 0.00105612 |
| 1435252_at | UDP-Gal:betaGal beta 1,3-galactosyltransferase, polypeptide 6                                  | B3galt6       | 117592 | -1.4 | 0.03390006 |
| 1416432_at | 6-phosphofructo-2-kinase/fructose-2,6-biphosphatase 3                                          | Pfkfb3        | 170768 | -1.4 | 0.0040803  |
| 1451026_at | FtsJ homolog 3 (E. coli)                                                                       | Ftsj3         | 56095  | -1.4 | 0.00518366 |
| 1417270_at | WD repeat domain 12                                                                            | Wdr12         | 57750  | -1.4 | 0.04010307 |
| 1449408_at | junction adhesion molecule 2                                                                   | Jam2          | 67374  | -1.4 | 0.01715498 |
| 1428074_at | transmembrane protein 158                                                                      | Tmem158       | 72309  | -1.4 | 0.01532434 |
| 1451540_at | mannose phosphate isomerase                                                                    | Mpi           | 110119 | -1.4 | 0.03583151 |
| 1448270_at | DEAD (Asp-Glu-Ala-Asp) box polypeptide 21                                                      | Ddx21         | 56200  | -1.4 | 0.00956159 |
| 1435283_s  | gene model 967, (NCBI)                                                                         | Gm967         | 381217 | -1.4 | 0.00339589 |
| 1416962_at | regulator of chromosome condensation 1                                                         | Rcc1          | 100088 | -1.4 | 0.02334246 |
| 1419883_s  | ATPase, H+ transporting, lysosomal V1 subunit B2                                               | Atp6v1b2      | 11966  | -1.4 | 0.02606209 |
| 1448014_s  | ubiquitin specific peptidase 24                                                                | Usp24         | 329908 | -1.4 | 0.00358317 |
| 1454841_at | URB1 ribosome biogenesis 1 homolog (S. cerevisiae)                                             | Urb1          | 207932 | -1.4 | 0.00576852 |
| 1436568_at | junction adhesion molecule 2                                                                   | Jam2          | 67374  | -1.4 | 0.01271494 |
| 1428223_at | major facilitator superfamily domain containing 2                                              | Mfsd2         | 76574  | -1.4 | 0.01453271 |
| 1451508_at | La ribonucleoprotein domain family, member 2                                                   | Larp2         | 214048 | -1.4 | 0.01155902 |
| 1452445_at | Mus musculus, clone IMAGE:3980872, mRNA                                                        | Slc41a2       | 338365 | -1.4 | 0.03015681 |
| 1434185_at | acetyl-Coenzyme A carboxylase alpha                                                            | Acaca         | 107476 | -1.4 | 0.04851745 |
| 1418222_at | RIKEN cDNA 2610024G14 gene                                                                     | 2610024G14Rik | 56412  | -1.4 | 0.00083315 |
| 1428870_at | nucleolar and coiled-body phosphoprotein 1                                                     | Nolc1         | 70769  | -1.4 | 0.00272392 |
| 1421321_a  | neuroepithelial cell transforming gene 1                                                       | Net1          | 56349  | -1.4 | 0.02963884 |
| 1436196_at | hypothetical protein C030046G05                                                                | C030046G05    | 327885 | -1.4 | 0.02144374 |
| 1440799_s  | FERM, RhoGEF and pleckstrin domain protein 2                                                   | Farp2         | 227377 | -1.4 | 0.02065468 |
| 1459546_s  | ectonucleotide pyrophosphatase/phosphodiesterase 1                                             | Enpp1         | 18605  | -1.4 | 0.03198008 |

| SUPPLEMENTAL TABLE 4: List Of Genes Down Regulated By P4 That Are Dependent On SRC-2 |                                                                                 |               |           |             |         |
|--------------------------------------------------------------------------------------|---------------------------------------------------------------------------------|---------------|-----------|-------------|---------|
| Probe set                                                                            | Gene Title                                                                      | Gene Symbol   | Entrez ID | Fold change | p value |
| 1423367_at                                                                           | wingless-related MMTV integration site 7A                                       | Wnt7a         | 22421     | 3.3         | 0.0236  |
| 1427323_s_s                                                                          | WD repeat domain, phosphoinositide interacting 1                                | Wipi1         | 52639     | 2.3         | 0.0097  |
| 1453231_at                                                                           | cyclin-dependent kinase-like 1 (CDC2-related kinase)                            | Cdkl1         | 71091     | 2.2         | 0.0188  |
| 1430143_at                                                                           | RIKEN cDNA 4930426D05 gene                                                      | 4930426D05Rik | 74644     | 1.7         | 0.0036  |
| 1438567_at                                                                           | von Willebrand factor A domain containing 2                                     | Vwa2          | 240675    | 1.7         | 0.0312  |
| 1437244_at                                                                           | growth arrest-specific 2 like 3                                                 | Gas2l3        | 237436    | 1.7         | 0.0240  |
| 1441338_at                                                                           | RIKEN cDNA 5930412G12 gene                                                      | 5930412G12Rik | 319616    | 1.7         | 0.0256  |
| 1418174_at                                                                           | D site albumin promoter binding protein                                         | Dbp           | 13170     | 1.7         | 0.0103  |
| 1427961_s_s                                                                          | UDP glucuronosyltransferase 2 family, polypeptide B34                           | Ugt2b34       | 100727    | 1.7         | 0.0491  |
| 1441975_at                                                                           | acid phosphatase, prostate                                                      | Acpp          | 56318     | 1.7         | 0.0206  |
| 1453289_at                                                                           | eukaryotic translation initiation factor 2C, 4                                  | Eif2c4        | 76850     | 1.7         | 0.0224  |
| 1428332_at                                                                           | phosphoinositide-3-kinase interacting protein 1                                 | Pik3ip1       | 216505    | 1.6         | 0.0243  |
| 1450781_at                                                                           | high mobility group AT-hook 2                                                   | Hmga2         | 15364     | 1.6         | 0.0010  |
| 1440048_at                                                                           | SWI/SNF related, matrix associated, actin dependent regulator of chromatin      | Smarca5       | 93762     | 1.6         | 0.0049  |
| 1422851_at                                                                           | high mobility group AT-hook 2                                                   | Hmga2         | 15364     | 1.6         | 0.0294  |
| 1441213_at                                                                           | cDNA sequence BC021891                                                          | BC021891      | 234878    | 1.6         | 0.0204  |
| 1450988_at                                                                           | leucine rich repeat containing G protein coupled receptor 5                     | Lgr5          | 14160     | 1.6         | 0.0290  |
| 1446847_at                                                                           | coiled-coil domain containing 88C                                               | Ccdc88c       | 68339     | 1.6         | 0.0482  |
| 1443536_at                                                                           | solute carrier family 7 (cationic amino acid transporter, y+ system), member 11 | Slc7a11       | 26570     | 1.6         | 0.0033  |
| 1441926_x_s                                                                          | transmembrane inner ear                                                         | Tmie          | 20776     | 1.6         | 0.0188  |
| 1416101_a_s                                                                          | histone cluster 1, H1c                                                          | Hist1h1c      | 50708     | 1.5         | 0.0085  |
| 1437633_at                                                                           | ankyrin repeat domain 11                                                        | Ankrd11       | 77087     | 1.5         | 0.0108  |
| 1429551_at                                                                           | RIKEN cDNA 4930579G22 gene                                                      | 4930579G22Rik | 69034     | 1.5         | 0.0382  |
| 1456262_at                                                                           | RNA binding motif protein 5                                                     | Rbm5          | 83486     | 1.5         | 0.0059  |
| 1457140_s_s                                                                          | Ras association (RalGDS/AF-6) domain family (N-terminal) member 10              | Rassf10       | 78748     | 1.5         | 0.0192  |
| 1433434_at                                                                           | expressed sequence AW551984                                                     | AW551984      | 244810    | 1.5         | 0.0489  |
| 1420019_at                                                                           | Tetraspanin 8 (Tspan8), mRNA                                                    | Tspan8        | 216350    | 1.5         | 0.0030  |
| 1422185_a_s                                                                          | cytochrome b5 reductase 3                                                       | Cyb5r3        | 109754    | 1.5         | 0.0046  |
| 1437661_at                                                                           | expressed sequence AU021092                                                     | AU021092      | 239691    | 1.5         | 0.0021  |
| 1442143_at                                                                           | anoctamin 4                                                                     | Ano4          | 320091    | 1.5         | 0.0482  |
| 1454880_s_s                                                                          | BCL2 modifying factor                                                           | Bmf           | 171543    | 1.5         | 0.0049  |
| 1426621_a_s                                                                          | protein phosphatase 2 (formerly 2A), regulatory subunit B (PR 52), beta isoform | Ppp2r2b       | 72930     | 1.5         | 0.0360  |
| 1442368_at                                                                           | potassium channel tetramerisation domain containing 12b                         | Kctd12b       | 207474    | 1.5         | 0.0078  |
| 1418359_at                                                                           | Williams Beuren syndrome chromosome region 27 (human)                           | Wbscr27       | 79565     | 1.5         | 0.0092  |
| 1447551_x_s                                                                          | latrophilin 3                                                                   | Lphn3         | 319387    | 1.5         | 0.0249  |
| 1419070_at                                                                           | cystin 1                                                                        | Cys1          | 12879     | 1.5         | 0.0390  |
| 1421317_x_s                                                                          | myeloblastosis oncogene                                                         | Myb           | 17863     | 1.5         | 0.0377  |
| 1438069_a_s                                                                          | RNA binding motif protein 5                                                     | Rbm5          | 83486     | 1.5         | 0.0416  |
| 1455220_at                                                                           | frequently rearranged in advanced T-cell lymphomas 2                            | Frat2         | 212398    | 1.5         | 0.0139  |

|            |                                                                        |               |           |     |        |
|------------|------------------------------------------------------------------------|---------------|-----------|-----|--------|
| 1436596_at | H2A histone family, member V                                           | H2afv         | 77605     | 1.5 | 0.0016 |
| 1453645_at | RIKEN cDNA 2700046A07 gene                                             | 2700046A07Rik | 78449     | 1.5 | 0.0327 |
| 1452507_at | distal-less homeobox 6                                                 | Dlx6          | 13396     | 1.5 | 0.0183 |
| 1426566_s  | interleukin 17 receptor E                                              | Il17re        | 57890     | 1.4 | 0.0158 |
| 1425538_x  | carcinoembryonic antigen-related cell adhesion molecule 1              | Ceacam1       | 26365     | 1.4 | 0.0399 |
| 1452935_at | predicted gene, EG546143                                               | EG546143      | 546143    | 1.4 | 0.0086 |
| 1434156_at | RAB11 family interacting protein 4 (class II)                          | Rab11fip4     | 268451    | 1.4 | 0.0448 |
| 1426604_at | ribonuclease L (2', 5'-oligoadenylate synthetase-dependent)            | Rnase1        | 24014     | 1.4 | 0.0039 |
| 1436357_at | predicted gene, ENSMUSG00000072593                                     | ENSMUSG00000  | 100191074 | 1.4 | 0.0146 |
| 1428936_at | ATPase, Ca <sup>++</sup> transporting, plasma membrane 1               | Atp2b1        | 67972     | 1.4 | 0.0377 |
| 1453261_at | RIKEN cDNA 2610035D17 gene                                             | 2610035D17Rik | 72386     | 1.4 | 0.0072 |
| 1443640_at | Zinc finger protein 617 (Zfp617), mRNA                                 | Zfp617        | 170938    | 1.4 | 0.0109 |
| 1451539_at | BAI1-associated protein 2-like 1                                       | Baiap2l1      | 66898     | 1.4 | 0.0284 |
| 1428523_at | latrophilin 3                                                          | Lphn3         | 319387    | 1.4 | 0.0186 |
| 1452588_at | zinc finger protein 688                                                | Zfp688        | 69234     | 1.4 | 0.0121 |
| 1450839_at | DNA segment, human D4S114                                              | D0H4S114      | 27528     | 1.4 | 0.0250 |
| 1454617_at | arrestin domain containing 3                                           | Arrdc3        | 105171    | 1.4 | 0.0010 |
| 1450227_at | ankyrin repeat domain 6                                                | Ankrd6        | 140577    | 1.4 | 0.0335 |
| 1456888_at | 6-phosphofructo-2-kinase/fructose-2,6-biphosphatase 4                  | Pfkfb4        | 270198    | 1.4 | 0.0039 |
| 1455992_at | vestigial like 4 (Drosophila)                                          | Vgll4         | 232334    | 1.4 | 0.0078 |
| 1456351_at | bromodomain containing 8                                               | Brd8          | 78656     | 1.4 | 0.0128 |
| 1443964_at | transmembrane inner ear                                                | Tmie          | 20776     | 1.4 | 0.0255 |
| 1436994_a  | histone cluster 1, H1c                                                 | Hist1h1c      | 50708     | 1.4 | 0.0098 |
| 1438756_at | ankyrin repeat domain 29                                               | Ankrd29       | 225187    | 1.4 | 0.0410 |
| 1451326_at | abhydrolase domain containing 14b                                      | Abhd14b       | 76491     | 1.4 | 0.0086 |
| 1450967_at | protein tyrosine phosphatase-like A domain containing 2                | Ptplad2       | 66775     | 1.4 | 0.0191 |
| 1419458_at | Rho-guanine nucleotide exchange factor                                 | Rgnef         | 110596    | 1.4 | 0.0327 |
| 1453416_at | growth arrest-specific 2 like 3                                        | Gas2l3        | 237436    | 1.4 | 0.0324 |
| 1416922_a  | BCL2/adenovirus E1B interacting protein 3-like                         | Bnip3l        | 12177     | 1.4 | 0.0014 |
| 1426624_a  | yippee-like 3 (Drosophila)                                             | Ypel3         | 66090     | 1.4 | 0.0022 |
| 1422941_at | wingless-related MMTV integration site 16                              | Wnt16         | 93735     | 1.4 | 0.0148 |
| 1451019_at | cathepsin F                                                            | Ctsf          | 56464     | 1.4 | 0.0001 |
| 1420947_at | alpha thalassemia/mental retardation syndrome X-linked homolog (human) | Atrx          | 22589     | 1.4 | 0.0222 |
| 1418472_at | aspartoacylase                                                         | Aspa          | 11484     | 1.4 | 0.0264 |
| 1455646_at | RIKEN cDNA 2010004M13 gene                                             | 2010004M13Rik | 76511     | 1.4 | 0.0153 |
| 1440619_at | mitogen-activated protein kinase 8 interacting protein 1               | Mapk8ip1      | 19099     | 1.4 | 0.0339 |
| 1417000_at | ankyrin repeat and BTB (POZ) domain containing 1                       | Abtb1         | 80283     | 1.4 | 0.0024 |
| 1435499_at | leucine zipper-EF-hand containing transmembrane protein 2              | Letm2         | 270035    | 1.4 | 0.0158 |
| 1437217_at | ankyrin repeat domain 6                                                | Ankrd6        | 140577    | 1.4 | 0.0074 |
| 1420416_at | sema domain, immunoglobulin domain (Ig), short basic domain, secreted  | Sema3a        | 20346     | 1.4 | 0.0148 |
| 1427369_at | NLR family, pyrin domain containing 6                                  | Nlrp6         | 101613    | 1.4 | 0.0372 |



|            |                                                                    |               |        |     |        |
|------------|--------------------------------------------------------------------|---------------|--------|-----|--------|
| 1435198_at | predicted gene, 545228                                             | 545228        | 545228 | 1.4 | 0.0245 |
| 1446802_at | ATX1 (antioxidant protein 1) homolog 1 (yeast), mRNA (cDNA clone M | Atox1         | 11927  | 1.4 | 0.0057 |
| 1451453_at | death-associated protein kinase 2                                  | Dapk2         | 13143  | 1.4 | 0.0082 |
| 1437110_at | RIKEN cDNA 2810474O19 gene                                         | 2810474O19Rik | 67246  | 1.4 | 0.0027 |
| 1421912_at | solute carrier family 23 (nucleobase transporters), member 1       | Slc23a1       | 20522  | 1.4 | 0.0462 |
| 1423375_at | RIKEN cDNA 1700023B02 gene                                         | 1700023B02Rik | 66935  | 1.4 | 0.0062 |
| 1450782_at | wingless-related MMTV integration site 4                           | Wnt4          | 22417  | 1.4 | 0.0271 |
